# Supplementary material for: Prognosis and immunoinfiltration analysis of angiogene-related genes in grade 4 diffuse gliomas
Source: publisher site journal article supplement (doi:10.18632/aging.205054), 2023-09-21
Supplement: Supplementary file [file aging-v15i18-205054-supplementary-material-SD5.pdf]

## SUPPLEMENTARY TABLE

**Supplementary Table 5. Angiogenesis-related genes from the molecular signatures database (MSigDB).**

---

CANX  
EMCN  
EPGN  
FOXO4  
NPPB  
SPINK5  
THY1  
TNNI3

---
