# Supplementary material for: Prognosis and immunoinfiltration analysis of angiogene-related genes in grade 4 diffuse gliomas
Source: Aging (Albany NY). 2023 Sep 21;15(18):9842–57. doi: 10.18632/aging.205054 (PMC10564429; doi:10.18632/aging.205054)
Supplement: Supplementary Table 1 [file aging-15-205054-s001.xls]

## Sheet: Sheet1
Supplementary Table 1. Angiogenesis-related genes for grade 4 diffuse gliomas.
GENE	logFC	AveExpr	t	P.Value	adj.P.Val	B	regulated
VEGFA	-2.40701	13.609	-3.24809	0.00139759	0.0081734	-1.9529	Down
HIF1A	-1.43486	13.4722	-3.61867	0.000389298	0.00270199	-0.764759	Down
TEK	1.63242	8.24977	3.366	0.000941099	0.00586193	-1.587	Up
ANGPT2	-3.85369	10.6931	-7.35335	7.58e-12	2.93e-10	16.381	Down
ENG	-1.55153	12.2274	-3.93865	0.000118988	0.00095228	0.349124	Down
PLG	2.51777	0.86225	5.99396	1.17e-08	2.37e-07	9.21242	Up
MMP9	-6.4225	9.6781	-6.86028	1.19e-10	3.73e-09	13.6835	Down
MMP2	-3.47606	12.261	-6.44949	1.1e-09	2.85e-08	11.5177	Down
TYMP	-2.00159	10.4925	-3.78186	0.000214675	0.0016047	-0.206649	Down
NRP1	-1.5411	11.6163	-3.20294	0.00162157	0.00927084	-2.08998	Down
PGF	-2.43285	9.75961	-4.86452	2.58e-06	3.19e-05	3.9995	Down
FLT4	-1.56443	9.06882	-3.08303	0.00238803	0.0129373	-2.44568	Down
TGFB1	-1.35743	11.6816	-3.25314	0.00137442	0.00810288	-1.93746	Down
EPO	-2.01916	3.43927	-3.20505	0.00161037	0.0092171	-2.0836	Down
ISM1	1.53939	5.38819	2.29166	0.0231399	0.0863897	-4.48136	Up
HPSE	-1.41173	8.55695	-2.63245	0.00925021	0.0405954	-3.6724	Down
EGFR	-3.97462	14.6318	-3.96649	0.000106954	0.000867679	0.449782	Down
PECAM1	-1.25993	12.0799	-3.33375	0.00104972	0.00644883	-1.68823	Down
TP53	-2.44202	11.7005	-5.9451	1.51e-08	2.97e-07	8.97162	Down
BAIAP2	1.98713	11.1388	5.06536	1.04e-06	1.4e-05	4.86929	Up
MAPK1	1.45505	13.177	4.11629	5.97e-05	0.00051852	1.00143	Up
GDF2	1.37661	0.180173	7.76123	7.22e-13	3.38e-11	18.685	Up
ANG	-2.78973	7.47708	-5.88982	1.99e-08	3.83e-07	8.70068	Down
ETS1	-1.19795	11.3419	-2.90909	0.00410476	0.0205554	-2.94003	Down
ITGB1	-1.5244	12.615	-3.72743	0.000262388	0.00191567	-0.395133	Down
TIMP1	-3.05638	13.736	-4.79687	3.48e-06	4.16e-05	3.71249	Down
FGFR2	1.92571	10.6615	3.68826	0.000302756	0.00217392	-0.529344	Up
ITGB3	-2.94661	6.89128	-4.87726	2.44e-06	3.03e-05	4.0539	Down
ACE	-1.70867	9.51155	-3.21183	0.00157497	0.0090532	-2.06311	Down
PTK2	1.09088	12.3383	3.50347	0.000585654	0.00386652	-1.14605	Up
MMP14	-3.46988	13.0089	-6.2771	2.73e-09	6.31e-08	10.6329	Down
ANPEP	-2.03565	8.64468	-3.17007	0.00180507	0.0101672	-2.18868	Down
FN1	-3.21844	15.5919	-5.96094	1.39e-08	2.77e-07	9.04952	Down
EPHB4	-2.14666	10.4821	-4.08487	6.76e-05	0.000576814	0.884317	Down
BAIAP3	2.88149	10.5957	3.90161	0.000137006	0.00107864	0.216117	Up
EPHA2	-1.32077	9.24786	-2.50221	0.0132775	0.0548062	-3.99385	Down
VWF	-1.162	12.8776	-2.3156	0.021763	0.0821263	-4.42796	Down
CD36	-2.00621	7.85639	-2.87812	0.00450917	0.0222763	-3.02533	Down
PLAU	-3.56762	10.48	-5.43371	1.87e-07	2.93e-06	6.53101	Down
ITGA5	-2.69466	11.573	-5.37548	2.46e-07	3.77e-06	6.26276	Down
SERPINE1	-3.66224	12.4234	-4.59538	8.34e-06	9.08e-05	2.87598	Down
ERBB2	-1.10637	11.1641	-2.07662	0.0393265	0.132596	-4.93759	Down
MET	2.12569	8.722	2.39326	0.0177783	0.069984	-4.25112	Up
ADM	-1.73436	10.7378	-2.34487	0.0201773	0.0776037	-4.36195	Down
CEACAM1	-1.5449	5.24027	-2.58508	0.0105663	0.0453999	-3.79106	Down
TGFA	1.72869	8.55159	2.74965	0.00660508	0.0308135	-3.3703	Up
SPP1	-2.51031	16.6097	-3.50986	0.000572689	0.00379085	-1.12518	Down
SOD2	-1.58837	15.2829	-2.42265	0.0164474	0.0656464	-4.18277	Down
ROBO4	-1.05472	10.5673	-2.38682	0.0180822	0.0709677	-4.26599	Down
COL4A2	-3.57963	13.8825	-6.50405	8.22e-10	2.19e-08	11.8008	Down
HMOX1	-2.22407	12.3433	-3.86856	0.000155244	0.00120669	0.0983352	Down
LRP5	-1.25825	10.6607	-2.66336	0.00847298	0.0377153	-3.5939	Down
TGFBR1	-1.26496	11.7094	-3.90651	0.000134482	0.0010603	0.233653	Down
KIT	2.05078	8.64793	3.18513	0.0017187	0.00974145	-2.14356	Up
PRKCA	1.20008	12.1279	3.0986	0.0022724	0.0124156	-2.40018	Up
NRP2	-1.26092	12.0199	-2.41293	0.0168775	0.0670501	-4.20546	Down
TNC	-4.0016	14.4013	-6.86161	1.19e-10	3.71e-09	13.6906	Down
JAG1	-2.2651	12.0801	-4.40191	1.88e-05	0.000188157	2.09917	Down
RHOJ	-1.65682	10.5782	-3.40138	0.000834105	0.00526543	-1.47501	Down
EPHA1	-1.16896	6.06999	-2.38235	0.0182958	0.0716667	-4.27628	Down
CXCR4	-2.71689	11.3415	-6.17503	4.64e-09	1.02e-07	10.116	Down
AKT3	1.579	11.2056	3.67198	0.000321195	0.00228382	-0.584747	Up
PTGS1	-1.69694	10.6653	-2.94536	0.00367355	0.0187595	-2.83909	Down
MAPK3	1.47226	11.9689	4.97316	1.59e-06	2.05e-05	4.46674	Up
PTN	-1.59603	14.7779	-3.04998	0.00265171	0.0141568	-2.5416	Down
MMP1	-2.13451	4.86827	-2.14039	0.0337352	0.11718	-4.80673	Down
PRKD1	-1.55708	10.3402	-4.15462	5.13e-05	0.000453744	1.14526	Down
PRKD2	-1.42641	10.4806	-4.02907	8.4e-05	0.000700869	0.678167	Down
CALR	-1.33678	15.2041	-4.60071	8.15e-06	8.91e-05	2.89775	Down
BIRC5	-6.27399	10.9026	-10.9622	1.56e-21	2.63e-19	38.315	Down
PRSS23	-2.00502	11.1549	-3.96329	0.000108276	0.000876996	0.438178	Down
F2R	-4.48528	11.7843	-10.0489	5.63e-19	6.41e-17	32.5121	Down
ZC3H12A	-1.10969	7.76452	-2.22678	0.0272628	0.0986994	-4.62349	Down
PDGFC	-1.59236	10.429	-3.73734	0.000253015	0.0018562	-0.360992	Down
FGFR3	2.18637	11.402	2.83784	0.00508964	0.024712	-3.13504	Up
COL4A1	-4.63973	13.8803	-8.3834	1.8e-14	1.08e-12	22.3095	Down
MYC	-2.11349	10.7554	-4.58788	8.61e-06	9.34e-05	2.84535	Down
SERPINB5	1.62015	0.499937	4.68536	5.66e-06	6.44e-05	3.24612	Up
BAIAP2L2	2.17492	6.13766	4.97846	1.55e-06	2.01e-05	4.48971	Up
VCAM1	-2.51687	10.9968	-3.81903	0.000186947	0.0014199	-0.0766056	Down
EGFL7	1.54357	9.75624	3.80302	0.000198446	0.00149615	-0.13275	Up
ECSCR	-2.42943	7.28232	-5.30765	3.4e-07	5.05e-06	5.9529	Down
MMP7	-4.76014	6.55061	-4.38491	2.02e-05	0.000200564	2.03219	Down
CXCL10	-3.92249	8.81061	-4.89173	2.29e-06	2.86e-05	4.11578	Down
MMP3	2.29889	3.59677	2.30889	0.0221415	0.0833361	-4.44298	Up
SEMA4A	3.72738	8.3887	8.83013	1.18e-15	8.49e-14	24.983	Up
IL10	-2.06094	5.53968	-2.99936	0.003108	0.0162543	-2.6867	Down
CASP3	-1.43885	11.2341	-3.98654	9.9e-05	0.000811867	0.522646	Down
PLAUR	-1.64085	10.1897	-3.02445	0.00287349	0.015184	-2.61505	Down
PCNA	-2.37527	12.378	-6.77756	1.88e-10	5.7e-09	13.2411	Down
BDNF	3.90423	6.28501	4.93302	1.9e-06	2.42e-05	4.29319	Up
KLK3	1.83075	0.311575	5.1696	6.47e-07	9.09e-06	5.331	Up
APLN	-1.45989	12.2477	-2.86684	0.00466535	0.0229503	-3.0562	Down
ESM1	-2.70304	8.26711	-3.24938	0.00139165	0.00814338	-1.94896	Down
CAV1	-2.37391	11.6466	-3.51286	0.000566693	0.00375733	-1.11537	Down
HSPG2	-2.14811	11.5091	-3.55908	0.00048146	0.00325537	-0.963316	Down
PTK2B	2.37747	11.169	5.07191	1.01e-06	1.36e-05	4.8981	Up
SRPX2	-4.68471	9.82508	-6.73035	2.43e-10	7.2e-09	12.99	Down
CSF1	-1.11524	11.9042	-2.36035	0.0193804	0.0750903	-4.32672	Down
EDIL3	3.63177	10.4515	4.99959	1.41e-06	1.84e-05	4.58159	Up
MDK	-3.81168	12.5053	-7.9843	1.95e-13	9.93e-12	19.9701	Down
HFE	-1.7773	8.86816	-3.56767	0.000467007	0.00316827	-0.934857	Down
FLT3	2.34813	3.7072	3.61765	0.000390723	0.00271064	-0.768179	Up
STAB1	-1.99347	12.3542	-3.67394	0.000318924	0.00227061	-0.5781	Down
F2RL1	-2.06248	8.10495	-3.01159	0.00299162	0.0157149	-2.65186	Down
PIK3CB	1.43675	10.3429	4.21204	4.08e-05	0.000375863	1.36278	Up
CA9	-4.26434	8.43632	-4.354	2.29e-05	0.000224982	1.91093	Down
AMOTL2	1.23299	10.937	2.3887	0.0179932	0.0706783	-4.26166	Up
YJEFN3	2.18011	8.03782	3.54604	0.000504194	0.00338976	-1.00638	Up
SDC1	-2.13732	9.53713	-3.35678	0.000971038	0.00602681	-1.61604	Down
MPL	1.92161	3.50109	3.85068	0.000166047	0.00127622	0.0349787	Up
RTN4	1.44495	14.3706	4.90169	2.19e-06	2.74e-05	4.15848	Up
MEOX2	-4.97893	9.41554	-5.23656	4.74e-07	6.84e-06	5.63115	Down
HIPK2	1.18052	12.8798	2.43618	0.0158651	0.0636919	-4.15104	Up
SMAD1	-1.0121	10.7564	-2.65529	0.00866991	0.0384166	-3.61447	Down
CD248	-2.958	10.4097	-5.35694	2.69e-07	4.07e-06	6.17781	Down
GREM1	2.89482	6.54633	3.12524	0.00208649	0.0115311	-2.32185	Up
PON1	1.73202	3.13567	2.93167	0.0038312	0.0194217	-2.87733	Up
F2	1.32203	0.848533	3.65482	0.000341786	0.00241095	-0.642945	Up
IGFBP3	-3.5837	12.9568	-4.60334	8.06e-06	8.82e-05	2.9085	Down
SHC1	-1.59932	11.7596	-3.49373	0.000605955	0.00398056	-1.1778	Down
BAIAP2L1	1.35998	5.43056	2.51421	0.01285	0.0533328	-3.96487	Up
CHRDL1	1.79178	9.34392	2.39076	0.0178956	0.0703724	-4.25689	Up
FASLG	-1.2981	2.45604	-2.18796	0.0300236	0.106634	-4.70667	Down
MKI67	-5.45292	10.4058	-8.61467	4.42e-15	2.93e-13	23.6868	Down
MMP13	-2.96123	3.39264	-2.52383	0.0125161	0.0522626	-3.94154	Down
ADIPOQ	1.01722	0.627546	2.60946	0.00986939	0.042873	-3.73024	Up
S100A4	-3.41735	10.0156	-5.67761	5.72e-08	1e-06	7.67637	Down
NINJ1	-1.01376	11.6527	-2.88786	0.00437817	0.0217178	-2.99858	Down
IL18	-1.58161	9.22498	-3.07795	0.00242694	0.0131107	-2.4605	Down
CASP8	-1.35615	8.98778	-3.52648	0.000540208	0.0035971	-1.07074	Down
CD44	-3.3348	14.3518	-5.92305	1.68e-08	3.29e-07	8.86336	Down
MYDGF	-1.01799	11.7918	-3.24022	0.00143443	0.00835654	-1.97691	Down
SPARC	-2.96827	17.097	-7.81306	5.33e-13	2.55e-11	18.982	Down
GIT1	1.70934	12.0575	4.89558	2.25e-06	2.81e-05	4.1323	Up
BRAF	1.4164	10.1311	4.07722	6.96e-05	0.000592621	0.855913	Up
MAPK8	1.53364	10.0527	4.38263	2.04e-05	0.000202324	2.02324	Up
TNFRSF12A	-3.79095	11.311	-6.44006	1.16e-09	2.98e-08	11.4689	Down
NTN4	2.01414	8.11314	2.91397	0.00404414	0.0203057	-2.92651	Up
CHI3L1	-4.82935	16.1073	-4.8316	2.99e-06	3.63e-05	3.85946	Down
PPP1R16B	4.52194	9.30607	6.34275	1.93e-09	4.63e-08	10.9681	Up
ANXA2	-3.75196	13.8624	-6.93734	7.82e-11	2.52e-09	14.0983	Down
SCG3	1.68453	11.9858	2.43342	0.0159825	0.0640911	-4.15754	Up
CXCR2	-2.90799	6.04525	-4.58379	8.76e-06	9.49e-05	2.82869	Down
PTX3	-3.79859	9.79908	-4.64907	6.62e-06	7.4e-05	3.09618	Down
LOXL2	-3.37021	10.8933	-5.65587	6.36e-08	1.11e-06	7.57287	Down
FUT1	2.38976	5.59149	6.08777	7.27e-09	1.53e-07	9.67842	Up
CCL5	-1.98576	7.75779	-3.47007	0.000658051	0.00427726	-1.2546	Down
E2F7	-4.52153	8.22476	-8.24757	4.06e-14	2.32e-12	21.5078	Down
ID3	-3.16024	13.3557	-7.27135	1.21e-11	4.51e-10	15.9255	Down
RRAS	-1.5477	10.2106	-3.70435	0.000285505	0.00206451	-0.47434	Down
HSPB6	-1.32831	10.7234	-2.46682	0.0146135	0.0594406	-4.0786	Down
E2F8	-5.82942	6.97793	-10.636	1.29e-20	1.92e-18	36.2301	Down
PRKCB	4.8837	9.67188	7.95083	2.37e-13	1.19e-11	19.7762	Up
IL32	-2.51348	9.34813	-4.40753	1.84e-05	0.000184557	2.12137	Down
PGR	2.92718	3.40064	4.51772	1.16e-05	0.000122034	2.56101	Up
AQP1	-3.39495	14.5822	-4.34325	2.4e-05	0.000234298	1.8689	Down
MMP19	-2.29367	8.26982	-2.81521	0.0054448	0.0261967	-3.19604	Down
SST	6.69538	5.58149	6.75851	2.09e-10	6.25e-09	13.1397	Up
RAPGEF3	2.72786	9.18608	6.39681	1.45e-09	3.56e-08	11.2458	Up
ENPP2	2.9468	10.2815	4.00576	9.19e-05	0.000759802	0.592741	Up
EDNRA	-1.8533	9.9428	-3.89171	0.000142244	0.00111596	0.18075	Down
ACKR3	-1.80414	11.0796	-4.45237	1.53e-05	0.000156231	2.29923	Down
AGER	-1.00168	7.90121	-2.19664	0.0293862	0.104797	-4.68819	Down
SLIT2	3.03343	7.63768	3.96679	0.000106832	0.000867158	0.450856	Up
SHH	2.21288	5.24566	2.11353	0.0360002	0.123586	-4.8623	Up
TNFRSF11B	-1.567	8.27524	-2.35856	0.0194714	0.0753688	-4.33082	Down
CYBB	-1.47176	11.5567	-2.66361	0.00846691	0.0376938	-3.59326	Down
IFNA2	1.83263	0.141804	10.501	3.09e-20	4.39e-18	35.371	Up
SELE	3.0808	3.74561	3.79743	0.000202613	0.00152377	-0.15229	Up
POSTN	-5.72842	11.0352	-4.83162	2.99e-06	3.63e-05	3.85956	Down
CD47	1.02515	12.4804	3.50372	0.000585137	0.00386385	-1.14522	Up
NAMPT	-2.41599	13.6153	-3.71114	0.000278513	0.00201829	-0.451087	Down
EZH2	-4.22269	10.3498	-8.83774	1.13e-15	8.12e-14	25.029	Down
CXCL11	-2.70388	6.61464	-3.22667	0.00150002	0.00868175	-2.01815	Down
S1PR3	-2.59783	11.5161	-5.5006	1.35e-07	2.19e-06	6.84167	Down
CD40	-1.25051	8.53593	-2.8085	0.00555432	0.026641	-3.21404	Down
VCAN	-1.75176	13.2721	-4.19328	4.4e-05	0.000401581	1.29145	Down
HDAC5	1.3761	11.5463	4.17384	4.75e-05	0.000429757	1.21779	Up
CTSB	-1.12462	15.6697	-2.51655	0.0127679	0.0530869	-3.9592	Down
TBXA2R	-1.68201	7.61857	-3.66513	0.000329271	0.00233207	-0.608011	Down
PDPN	-3.87517	13.131	-6.26249	2.94e-09	6.74e-08	10.5586	Down
HIF1AN	1.01983	10.6031	3.29056	0.00121353	0.00731185	-1.82243	Up
ALOX5	-1.26424	9.86981	-2.31856	0.0215976	0.0816038	-4.42131	Down
INS	1.42172	0.070852	7.61922	1.65e-12	7.13e-11	17.8758	Up
CDKN1A	-1.54112	12.4286	-2.81676	0.00541985	0.0260912	-3.19189	Down
MAGI1	1.22997	10.7336	2.47348	0.0143532	0.0585374	-4.06273	Up
VCL	-1.04082	11.6882	-2.52323	0.0125368	0.0523381	-3.94301	Down
KLF4	1.06024	8.29775	2.31835	0.0216094	0.0816247	-4.42179	Up
CDK2	-3.3921	10.5202	-9.38872	3.68e-17	3.29e-15	28.396	Down
RUNX1	-2.18231	10.5086	-3.93947	0.000118615	0.000949925	0.352085	Down
SH2D2A	-1.1241	5.60808	-2.02465	0.0444531	0.145834	-5.04145	Down
WNT5A	-1.93582	10.3299	-4.29482	2.92e-05	0.000278747	1.68063	Down
PIK3R1	1.19765	12.6214	2.78084	0.00602754	0.0285441	-3.28785	Up
CDH13	3.09203	9.60972	4.05964	7.46e-05	0.000630712	0.790833	Up
MGAT5	1.32963	11.4461	3.51607	0.000560332	0.00371882	-1.10485	Up
IL4	-1.32561	1.6873	-2.77574	0.0061187	0.0288966	-3.30139	Down
TGIF1	-2.73312	10.926	-7.91157	2.99e-13	1.48e-11	19.5492	Down
LGALS1	-2.10147	13.923	-4.50684	1.21e-05	0.000126967	2.5172	Down
NR4A1	1.6317	9.83869	2.66723	0.00837986	0.0373889	-3.58401	Up
PIGF	-1.13986	9.57085	-3.68773	0.00030334	0.00217642	-0.531151	Down
RSPO3	4.59638	3.84654	5.68727	5.45e-08	9.6e-07	7.72246	Up
LGALS9	-1.42109	11.1462	-3.15651	0.00188624	0.0105692	-2.22914	Down
CFH	-1.27004	10.2088	-2.15134	0.0328471	0.114642	-4.78388	Down
PROKR2	5.33254	0.951193	10.3221	9.78e-20	1.28e-17	34.2364	Up
NOTCH3	-1.3314	12.2989	-2.67045	0.00830326	0.0371293	-3.57578	Down
PTPRB	1.06619	9.36024	2.61097	0.00982753	0.0427353	-3.72645	Up
NTN1	-2.37504	11.8022	-4.52668	1.12e-05	0.000118102	2.59713	Down
CX3CL1	1.69539	11.6091	3.85453	0.000163667	0.00126081	0.0485759	Up
ADAMTS9	-1.9312	10.4402	-3.53402	0.000526046	0.00351713	-1.04597	Down
TDGF1	1.43403	3.64083	2.30064	0.022615	0.0847858	-4.4614	Up
ALB	1.13368	4.04142	2.00557	0.0464726	0.151082	-5.07894	Up
SEMA4D	2.85515	10.5551	6.3729	1.65e-09	4.01e-08	11.1228	Up
BAX	-1.35312	11.3664	-4.17884	4.66e-05	0.000422474	1.23674	Down
F11R	-1.43832	9.51662	-3.29004	0.00121566	0.00732254	-1.82405	Down
TERT	-3.36112	4.49796	-3.76045	0.000232372	0.0017223	-0.281076	Down
CALCRL	-1.68129	10.76	-2.96534	0.00345409	0.0178269	-2.78299	Down
IL24	-2.20576	4.57145	-3.77321	0.000221664	0.00165042	-0.236757	Down
RAMP2	-1.14058	9.66266	-2.79549	0.0057726	0.0275199	-3.24885	Down
CDKN3	-2.21419	8.7303	-4.70961	5.1e-06	5.85e-05	3.34683	Down
SCUBE2	-1.70199	9.74148	-2.51451	0.0128396	0.0532969	-3.96415	Down
TNFRSF1B	-1.07117	10.9397	-2.09931	0.0372522	0.126976	-4.89146	Down
NGF	1.64835	3.86547	2.41036	0.0169931	0.0673976	-4.21146	Up
NES	-3.2152	14.6618	-5.8878	2.01e-08	3.87e-07	8.69079	Down
PTTG1	-3.42316	10.3124	-7.50777	3.13e-12	1.29e-10	17.246	Down
EFEMP1	-2.77217	13.3491	-4.11773	5.94e-05	0.000516189	1.00679	Down
PTK7	-2.32349	11.2242	-5.89971	1.89e-08	3.66e-07	8.74902	Down
KNG1	1.76903	1.27643	3.71469	0.000274919	0.00199488	-0.438903	Up
MXRA8	-1.16863	11.135	-2.3453	0.0201547	0.0775223	-4.36097	Down
CAPN6	-3.56713	4.12842	-3.54758	0.000501453	0.00337321	-1.0013	Down
IL15	-1.81346	6.29734	-3.25558	0.00136339	0.00808113	-1.93002	Down
SYK	-1.21335	10.2066	-2.49927	0.0133841	0.0551635	-4.00093	Down
AZU1	1.49054	2.90979	2.41072	0.0169768	0.0673549	-4.21062	Up
NOX4	-3.9076	8.0572	-8.0645	1.21e-13	6.4e-12	20.4361	Down
COL5A1	-2.57941	10.9127	-3.16903	0.00181116	0.0101929	-2.19178	Down
ANXA5	-2.63514	14.6344	-6.46274	1.02e-09	2.67e-08	11.5863	Down
LGALS3	-2.3479	12.6128	-3.44557	0.000716392	0.00460452	-1.33363	Down
CYLD	1.50841	10.8613	4.03584	8.18e-05	0.000685696	0.703053	Up
CLIC4	-1.76624	14.4053	-4.55115	1.01e-05	0.000107424	2.69606	Down
BMPR2	1.28619	11.7787	4.41287	1.8e-05	0.000180875	2.14248	Up
NF1	1.18736	11.5685	2.93749	0.00376343	0.0191436	-2.86109	Up
SEMA3F	-1.15149	9.06669	-2.1336	0.0342956	0.118738	-4.82084	Down
LOX	-3.46871	10.4163	-4.60171	8.12e-06	8.87e-05	2.90181	Down
RCAN2	3.82859	9.86879	5.27935	3.88e-07	5.69e-06	5.82444	Up
IGFBP1	-2.53389	6.11947	-3.86859	0.000155225	0.00120669	0.0984544	Down
CCNA2	-3.74426	9.63287	-8.01564	1.62e-13	8.36e-12	20.1519	Down
COL8A1	-3.30239	9.53568	-3.56072	0.000478674	0.00323798	-0.957899	Down
MACC1	-3.29442	5.44497	-6.57217	5.71e-10	1.57e-08	12.1563	Down
HMGA2	-2.87306	5.74988	-2.76998	0.00622333	0.0292878	-3.31667	Down
GRP	2.16514	3.07386	2.93019	0.00384854	0.0194951	-2.88144	Up
ID4	-1.60698	12.8274	-2.97446	0.00335804	0.0174054	-2.75729	Down
PIK3R6	-1.33321	7.1172	-2.60163	0.0100885	0.0436318	-3.74983	Down
MAPK7	-1.21962	10.5698	-3.68868	0.000302288	0.00217082	-0.527893	Down
COL1A1	-4.1072	13.0011	-4.42122	1.74e-05	0.000175237	2.17554	Down
AR	-2.5113	9.59621	-4.17282	4.77e-05	0.000431134	1.21394	Down
PRKX	-1.04234	9.94868	-2.25716	0.0252585	0.0928798	-4.55741	Down
VIM	-3.42991	16.7578	-8.37386	1.9e-14	1.14e-12	22.253	Down
COL4A6	-2.07593	7.43043	-2.60931	0.00987339	0.0428792	-3.73061	Down
FOXP1	1.63052	9.59774	4.00911	9.08e-05	0.000751454	0.604995	Up
CXCL9	-3.71519	6.92027	-4.91384	2.07e-06	2.61e-05	4.21064	Down
SPRY1	-2.33947	10.688	-4.2982	2.88e-05	0.000275241	1.69372	Down
DDAH1	1.06116	12.4604	2.49087	0.0136933	0.0562308	-4.02113	Up
FOXM1	-4.44934	10.713	-8.15847	6.92e-14	3.78e-12	20.9849	Down
CCR3	-1.36729	2.04477	-2.71024	0.00740616	0.0337092	-3.47323	Down
PAK1	3.11496	11.1007	8.54164	6.89e-15	4.43e-13	23.2502	Up
NME1	-1.12399	11.9262	-3.22653	0.0015007	0.00868489	-2.01858	Down
EDN2	-2.23802	2.37334	-3.00066	0.00309542	0.0161996	-2.683	Down
EFNB1	-1.40788	10.5027	-3.62328	0.000382915	0.00266319	-0.749296	Down
IL5	1.1171	1.56454	2.47012	0.0144841	0.0589856	-4.07074	Up
TXNIP	-1.60677	13.4833	-3.99886	9.44e-05	0.000777541	0.567552	Down
MAPK10	2.1496	10.9835	4.8105	3.28e-06	3.95e-05	3.77008	Up
RHO	3.36579	2.24468	6.23245	3.44e-09	7.75e-08	10.4061	Up
CSPG4	-1.28617	12.3163	-2.32924	0.0210107	0.0797849	-4.39729	Down
MCL1	-1.01103	13.6285	-3.13717	0.00200787	0.0111516	-2.28658	Down
SP100	-1.99236	10.5681	-4.38966	1.98e-05	0.000197054	2.05089	Down
HOXA5	-7.32037	7.62579	-8.79604	1.46e-15	1.04e-13	24.7771	Down
MPO	2.58231	4.18758	3.43561	0.000741478	0.00475011	-1.36564	Up
MAP2K1	1.94769	11.6369	6.57664	5.58e-10	1.54e-08	12.1796	Up
LAMA4	-2.05934	11.626	-4.10918	6.14e-05	0.00053097	0.974875	Down
LAMB2	-1.77256	13.2232	-4.24098	3.63e-05	0.0003391	1.47335	Down
TP73	-2.28627	7.81665	-2.84785	0.00493933	0.0240691	-3.1079	Down
PDE4A	1.98273	9.82446	4.24397	3.59e-05	0.000335465	1.48479	Up
NRXN3	4.9469	8.20546	6.4935	8.7e-10	2.31e-08	11.7459	Up
TNNI2	-2.07991	4.79663	-4.50689	1.21e-05	0.000126963	2.51739	Down
NCKIPSD	1.40183	10.6816	4.0872	6.69e-05	0.000572117	0.892996	Up
CAMP	-2.75072	2.67122	-2.94194	0.00371238	0.0189274	-2.84866	Down
NDRG4	2.5338	13.0234	4.82258	3.11e-06	3.76e-05	3.82121	Up
HSPB1	-1.72546	13.5228	-3.96452	0.000107766	0.000873452	0.442634	Down
FAS	-1.77263	9.47157	-3.34024	0.00102697	0.00633097	-1.66794	Down
WNT7A	2.06895	7.62045	2.62495	0.00944819	0.0413443	-3.69132	Up
HAND2	-5.10944	5.42616	-4.63306	7.1e-06	7.87e-05	3.03031	Down
ARHGAP22	1.15123	8.7811	2.42117	0.0165125	0.0658498	-4.18624	Up
LEF1	-1.71413	9.78688	-3.7056	0.000284203	0.00205583	-0.470053	Down
WNT7B	3.46924	6.96425	3.9708	0.000105197	0.000855035	0.465421	Up
ITGB2	-1.53994	12.4813	-2.99066	0.0031933	0.0166399	-2.71141	Down
EIF4EBP1	-3.43065	10.6272	-10.2137	1.96e-19	2.41e-17	33.551	Down
PDPK1	1.39556	10.3526	3.80331	0.000198233	0.00149473	-0.131741	Up
STS	1.55267	9.63361	3.96472	0.000107684	0.00087302	0.443354	Up
SEMA3C	1.81518	8.51701	2.43298	0.0160013	0.0641408	-4.15857	Up
IL2RA	-4.42456	6.27504	-4.22913	3.81e-05	0.000353556	1.428	Down
CTSL	-1.19486	12.6445	-2.96987	0.00340607	0.0176212	-2.77023	Down
PLAT	-1.74904	11.7907	-3.31198	0.00112952	0.00686244	-1.75607	Down
SCG2	1.43228	12.2636	2.04398	0.0424837	0.140593	-5.00312	Up
CDK4	-2.9674	12.7352	-3.81848	0.00018733	0.00142227	-0.0785296	Down
NRXN1	2.96081	10.6746	4.16208	4.98e-05	0.000441831	1.17341	Up
NOX5	2.24283	3.03613	3.42901	0.00075855	0.00484388	-1.3868	Up
TGFBI	-4.44846	12.7718	-7.22349	1.58e-11	5.79e-10	15.6608	Down
GRN	-1.54487	13.4127	-4.25719	3.4e-05	0.000319752	1.53554	Down
FGF18	1.40785	3.71049	2.5341	0.0121683	0.0510074	-3.91654	Up
SFRP2	2.6592	7.49656	2.62172	0.00953461	0.0416381	-3.69945	Up
TSPAN12	-2.49034	10.3486	-4.13747	5.49e-05	0.000481874	1.08076	Down
ROCK2	1.02678	11.0695	2.79841	0.00572302	0.0273159	-3.24106	Up
ADAMTS8	3.41798	7.24456	5.47363	1.54e-07	2.46e-06	6.7161	Up
HDAC1	-1.46792	11.6305	-5.01042	1.34e-06	1.76e-05	4.62878	Down
IL1RAPL2	4.00072	2.08101	5.9049	1.84e-08	3.57e-07	8.77441	Up
ITGB8	-1.09865	13.0804	-2.05193	0.041695	0.138523	-4.98724	Down
MAPK9	2.22445	11.0611	7.52371	2.86e-12	1.19e-10	17.3358	Up
RHOC	-2.12293	13.5928	-6.24579	3.21e-09	7.3e-08	10.4737	Down
B2M	-2.35656	16.4932	-6.02718	9.92e-09	2.04e-07	9.37691	Down
ADTRP	3.25369	3.97729	5.0056	1.37e-06	1.8e-05	4.60776	Up
TLR2	-1.82428	10.0337	-3.49454	0.000604246	0.00397106	-1.17516	Down
ANXA1	-3.79205	13.3624	-6.16901	4.78e-09	1.05e-07	10.0857	Down
BTG1	-1.82198	12.369	-6.07104	7.92e-09	1.66e-07	9.59494	Down
ATP2B4	1.06809	13.0187	2.25218	0.0255783	0.0937914	-4.56831	Up
MMP8	-2.41565	2.34583	-2.63753	0.00911812	0.0401089	-3.65955	Down
HEY1	-1.5303	12.2896	-3.92916	0.000123374	0.000982965	0.314963	Down
DPP4	-1.71459	7.89698	-2.15583	0.0324891	0.113641	-4.77448	Down
APP	1.06698	15.8785	3.01305	0.00297797	0.0156527	-2.64768	Up
SEMA3B	1.60855	10.8367	3.18323	0.00172937	0.00979277	-2.14926	Up
YBX1	-2.35473	14.5413	-7.67757	1.17e-12	5.24e-11	18.2074	Down
DICER1	1.11745	10.9422	3.03807	0.00275313	0.0146299	-2.57593	Up
STIM1	1.03103	11.5307	2.90037	0.00421519	0.0210318	-2.96414	Up
CDK6	-1.81236	11.522	-2.94557	0.00367112	0.0187486	-2.83849	Down
GPNMB	-2.0226	12.1709	-3.19608	0.00165833	0.00945511	-2.11063	Down
EFNA3	2.07494	7.8238	4.64536	6.73e-06	7.5e-05	3.08089	Up
SFRP1	3.0302	7.7221	3.08934	0.00234053	0.0127241	-2.42727	Up
NGFR	-1.44018	10.2129	-2.30074	0.0226087	0.0847742	-4.46116	Down
PRKAA2	1.81142	8.45214	3.9417	0.000117607	0.000942852	0.360139	Up
HMGCR	1.39808	11.1389	3.88351	0.000146725	0.00114799	0.151517	Up
TLR3	-1.75889	8.72447	-3.753	0.000238845	0.00176293	-0.306881	Down
NTRK2	1.40575	14.134	2.00491	0.0465439	0.151223	-5.08024	Up
PROCR	-2.17577	8.86958	-5.05547	1.09e-06	1.46e-05	4.82587	Down
TAC1	4.18618	6.11838	3.45439	0.00069485	0.00448321	-1.30523	Up
FSTL1	-2.59704	13.3716	-6.4615	1.03e-09	2.68e-08	11.5799	Down
PTPN6	-1.1202	10.1288	-2.73335	0.00692637	0.0320872	-3.41304	Down
IQGAP1	-1.33924	12.6095	-3.0494	0.00265661	0.0141755	-2.54328	Down
GPR4	-1.36716	8.7937	-3.19303	0.00167499	0.00953114	-2.11984	Down
CCBE1	5.5058	3.35293	7.3257	8.87e-12	3.38e-10	16.2271	Up
FBXW7	2.79382	10.1648	7.41009	5.48e-12	2.18e-10	16.6978	Up
HK2	-1.44511	11.2359	-2.79144	0.00584213	0.0277944	-3.25966	Down
TEAD4	-1.9076	8.26766	-3.67597	0.000316581	0.0022577	-0.57119	Down
LAMB1	-1.90808	11.7875	-3.17329	0.00178629	0.0100736	-2.17906	Down
LIF	-2.93959	9.02698	-3.3444	0.00101262	0.00625389	-1.6549	Down
NRG1	1.87091	6.25663	2.04951	0.0419341	0.139185	-4.99209	Up
ADAM12	-2.58778	10.0946	-4.10501	6.24e-05	0.000538389	0.959293	Down
IL37	-1.14467	1.11158	-2.63226	0.00925515	0.0406112	-3.67288	Down
CCR1	-1.30385	9.57533	-2.45113	0.0152432	0.0616125	-4.11581	Down
MAP3K5	1.00406	10.6007	2.16357	0.0318799	0.111824	-4.75824	Up
RUNX3	-2.47419	7.96318	-5.32426	3.14e-07	4.69e-06	6.02851	Down
ELN	-2.51225	12.6065	-4.49033	1.3e-05	0.0001353	2.45091	Down
S100A1	2.60287	9.99771	3.8735	0.00015238	0.0011864	0.115881	Up
LAMA2	-1.09786	10.6426	-2.01373	0.0455999	0.148716	-5.06296	Down
EPHA4	1.63318	10.6228	3.29692	0.00118801	0.00717529	-1.80278	Up
TFAP2A	-2.91371	7.38055	-3.26186	0.00133526	0.00794405	-1.91077	Down
THPO	2.09222	5.28609	4.12619	5.74e-05	0.00050138	1.03848	Up
ADAM9	-1.63698	12.8868	-3.69599	0.000294348	0.00212186	-0.502942	Down
CRIM1	1.14983	10.9857	2.39011	0.0179264	0.0704842	-4.2584	Up
FILIP1L	-1.47217	10.116	-3.082	0.00239585	0.0129699	-2.44868	Down
CCL24	-1.43649	1.71196	-2.18749	0.030059	0.106727	-4.70768	Down
TBXAS1	-1.10272	10.2647	-2.41499	0.0167856	0.0667539	-4.20066	Down
TSHR	-2.087	5.30442	-2.05222	0.0416668	0.138473	-4.98667	Down
ADORA3	-1.52816	11.2604	-2.85143	0.00488651	0.0238521	-3.09817	Down
MUC1	-2.28154	8.91829	-4.44965	1.54e-05	0.000157836	2.28842	Down
ETS2	1.58918	11.057	4.12872	5.68e-05	0.000496779	1.04796	Up
NCAM1	1.73062	13.8087	3.51156	0.000569277	0.00377157	-1.11961	Up
HPSE2	3.31372	4.46783	3.37933	0.000899361	0.00562686	-1.54492	Up
FGF9	3.33141	5.37399	3.73024	0.000259699	0.00189879	-0.385465	Up
ADM2	-2.25389	5.19599	-2.96473	0.00346058	0.0178512	-2.7847	Down
HOXB13	-3.90383	4.82499	-3.14052	0.00198632	0.0110532	-2.27666	Down
SLC2A3	1.51003	11.3309	2.63036	0.00930512	0.040792	-3.67769	Up
CASP7	-1.18238	9.29884	-2.77163	0.00619308	0.0291818	-3.31228	Down
CD163	-4.7407	12.1482	-6.02015	1.03e-08	2.1e-07	9.34204	Down
RAPGEF2	2.2731	10.9327	6.22675	3.55e-09	7.96e-08	10.3773	Up
IDH1	-2.35718	12.4466	-6.86186	1.18e-10	3.7e-09	13.692	Down
CCNB1	-2.66463	10.8136	-5.77721	3.49e-08	6.42e-07	8.15401	Down
GATA4	-4.29735	4.37315	-3.79874	0.000201628	0.00151693	-0.147709	Down
EGR3	2.81495	9.31973	4.19986	4.28e-05	0.000392452	1.31643	Up
PITRM1	1.41384	10.8005	4.41119	1.81e-05	0.000182048	2.13585	Up
EFNB3	2.02584	10.5351	3.47173	0.000654255	0.00425464	-1.24921	Up
SSTR2	3.93849	8.07907	6.37865	1.6e-09	3.9e-08	11.1523	Up
ETV6	-1.2829	10.5164	-3.71367	0.000275945	0.00200136	-0.442398	Down
FLNA	-2.2825	14.8377	-4.55629	9.85e-06	0.000105536	2.7169	Down
TMSB4X	-1.48259	16.5976	-4.00689	9.15e-05	0.000757004	0.596876	Down
HMMR	-3.77827	8.46676	-7.33774	8.28e-12	3.18e-10	16.2941	Down
CHGA	5.82607	7.82525	5.16004	6.76e-07	9.45e-06	5.28836	Up
SERPINH1	-3.62116	12.6412	-8.28096	3.33e-14	1.92e-12	21.7043	Down
GDF15	-3.43488	8.6647	-4.60977	7.84e-06	8.61e-05	2.93477	Down
PLA2G3	1.98315	1.3955	3.53367	0.000526705	0.00352037	-1.04714	Up
RETN	-2.03598	2.95852	-2.45842	0.0149474	0.0605956	-4.09853	Down
NDRG3	1.82006	11.5815	5.39422	2.25e-07	3.47e-06	6.34889	Up
VLDLR	1.25284	9.62172	2.50986	0.0130034	0.0538772	-3.97539	Up
ITGA1	-2.05229	10.5728	-4.63784	6.95e-06	7.73e-05	3.04994	Down
IGFBP2	-5.42781	13.9221	-8.79679	1.45e-15	1.03e-13	24.7817	Down
CYBA	-1.9044	11.5985	-4.29793	2.88e-05	0.000275457	1.69267	Down
HOXD3	-3.58127	3.87777	-4.90355	2.17e-06	2.72e-05	4.16648	Down
PROS1	-2.73305	11.1798	-5.13691	7.53e-07	1.04e-05	5.18543	Down
TF	2.55168	11.9784	3.12633	0.00207915	0.0114978	-2.31862	Up
CCR4	-1.47872	3.41736	-2.31423	0.0218399	0.0823754	-4.43104	Down
ADAMTSL4	-1.22859	8.47427	-2.36197	0.0192989	0.074838	-4.32303	Down
NPY	4.37882	6.91164	4.75768	4.13e-06	4.85e-05	3.54763	Up
JAM2	-1.47401	12.5488	-3.79813	0.000202093	0.00152023	-0.149872	Down
ARHGEF4	1.99185	11.6458	3.89039	0.000142957	0.00112068	0.176032	Up
NDRG2	1.55555	14.2608	2.7089	0.00743492	0.0338112	-3.47671	Up
WNT2	3.17601	4.34867	3.54496	0.000506124	0.00340123	-1.00995	Up
ETV1	-2.08728	12.7876	-4.05794	7.51e-05	0.000634481	0.784534	Down
STC1	-2.24475	8.75767	-2.92947	0.00385708	0.0195269	-2.88345	Down
CP	-2.24645	10.514	-2.94833	0.00364015	0.0186077	-2.83078	Down
ELK3	-1.85418	10.9264	-5.01753	1.3e-06	1.71e-05	4.65979	Down
SDCBP	-1.02616	13.3824	-3.31843	0.00110532	0.00674455	-1.73602	Down
TNNI1	-1.41863	2.24201	-2.46697	0.0146074	0.0594222	-4.07823	Down
SPATA13	-1.55032	4.11357	-2.68908	0.0078716	0.0354295	-3.52793	Down
PTPRM	1.80231	10.0267	4.39112	1.97e-05	0.000195911	2.05664	Up
SOX2	-1.76436	13.5642	-3.58021	0.000446654	0.00305107	-0.893237	Down
CCR5	-1.49857	7.7877	-2.54661	0.0117562	0.0495477	-3.88596	Down
NPTX1	5.48266	9.56222	5.75493	3.9e-08	7.09e-07	8.04669	Up
CDK1	-4.56729	10.0172	-9.51149	1.7e-17	1.6e-15	29.1553	Down
CEBPB	-1.15661	10.4222	-2.51659	0.0127668	0.0530857	-3.95912	Down
HECW2	2.82103	8.68658	6.1019	6.76e-09	1.44e-07	9.749	Up
SIK2	1.20693	11.2107	3.61441	0.0003953	0.00273862	-0.77907	Up
CD276	-2.51221	12.413	-6.73748	2.34e-10	6.95e-09	13.0279	Down
COL1A2	-3.28105	13.4068	-4.10814	6.16e-05	0.000532644	0.97099	Down
EMILIN2	-2.18518	9.77588	-4.01837	8.76e-05	0.000727367	0.638907	Down
PTP4A3	-1.38854	10.8671	-2.96279	0.00348143	0.0179328	-2.79018	Down
LAMC1	-2.61789	12.6191	-5.60585	8.13e-08	1.38e-06	7.33581	Down
MSN	-2.11729	14.4044	-5.1695	6.47e-07	9.1e-06	5.33052	Down
NODAL	-2.51038	6.21987	-3.29044	0.00121404	0.00731422	-1.82282	Down
BDKRB1	1.653	2.83935	2.3147	0.0218134	0.0822854	-4.42998	Up
FKBP5	-1.49863	12.0334	-2.50451	0.0131945	0.0545284	-3.9883	Down
IGFBP7	-2.79592	14.7416	-6.10946	6.51e-09	1.39e-07	9.7868	Down
RAP1B	-1.6363	11.384	-4.71343	5.01e-06	5.76e-05	3.36271	Down
SPON2	-1.85776	9.20319	-2.98187	0.00328178	0.0170481	-2.73634	Down
PRKCD	1.47231	9.85137	3.53759	0.000519476	0.00347897	-1.03424	Up
PLXNA1	1.11871	11.7273	2.31945	0.0215484	0.0814537	-4.41933	Up
ADORA2A	1.09844	3.07585	2.15336	0.0326857	0.11419	-4.77965	Up
TNFRSF1A	-1.7103	12.6763	-4.22307	3.9e-05	0.000361171	1.40485	Down
CITED4	1.10953	7.13071	2.32495	0.0212451	0.0805437	-4.40697	Up
FGF10	2.21723	2.43041	2.22262	0.0275478	0.0994992	-4.63247	Up
ADAM8	-1.68596	8.55965	-2.52581	0.0124485	0.0520267	-3.93673	Down
PTPN3	3.97508	6.50665	4.76035	4.09e-06	4.8e-05	3.55884	Up
CCL20	-1.90542	5.27018	-2.01211	0.0457721	0.149214	-5.06614	Down
IL7	-2.18822	6.08181	-4.26253	3.33e-05	0.000313518	1.55605	Down
ERBB3	2.25661	9.34331	2.76279	0.00635587	0.0298165	-3.33566	Up
PAX2	2.87838	2.94857	3.11537	0.00215364	0.011847	-2.35093	Up
RRM2	-7.05215	10.811	-13.9315	5.29e-30	2.99e-27	57.5403	Down
PRCP	-1.76782	13.2604	-4.61197	7.77e-06	8.54e-05	2.94381	Down
POFUT1	-1.54093	12.0217	-4.39333	1.95e-05	0.00019434	2.06533	Down
PLEKHG5	2.36756	9.20294	5.18598	6e-07	8.49e-06	5.40415	Up
RAB13	-2.50467	12.0768	-6.91945	8.63e-11	2.77e-09	14.0018	Down
PI4KA	2.83954	11.9475	6.82849	1.42e-10	4.4e-09	13.5131	Up
CNR2	-1.14782	1.51465	-2.53675	0.01208	0.0507076	-3.91008	Down
CD151	-2.13127	13.1537	-4.82921	3.02e-06	3.67e-05	3.84933	Down
CXCL16	-1.82313	11.8641	-4.20919	4.13e-05	0.000379775	1.35193	Down
WIF1	5.79692	4.72096	5.01485	1.31e-06	1.73e-05	4.64809	Up
COL8A2	-1.59451	9.35483	-2.60916	0.0098777	0.0428948	-3.731	Down
ENPEP	-3.27434	9.10209	-6.47853	9.42e-10	2.48e-08	11.6682	Down
C3	-1.41692	15.1496	-2.35935	0.0194311	0.0752368	-4.32901	Down
S1PR2	-1.51376	8.82546	-3.46841	0.000661848	0.00429779	-1.25995	Down
PENK	3.02729	5.87282	3.33674	0.00103916	0.00639504	-1.67887	Up
PRNP	2.05392	13.3705	5.78214	3.41e-08	6.28e-07	8.17777	Up
SOAT1	-1.60809	11.1835	-5.35325	2.74e-07	4.14e-06	6.16092	Down
RASGRP1	2.34994	8.99789	3.89447	0.000140765	0.00110493	0.190597	Up
CCL23	-1.64605	2.11547	-2.36249	0.0192727	0.0747572	-4.32184	Down
USP20	1.26479	10.7312	3.3289	0.00106701	0.00654245	-1.70336	Up
IKBKB	-1.16806	11.2466	-3.92623	0.000124764	0.000992333	0.304399	Down
PKD1	1.39442	12.2567	2.7222	0.0071541	0.0329991	-3.44212	Up
IGFBP5	-1.60633	15.242	-2.78048	0.00603401	0.0285703	-3.28882	Down
FCGR3A	-2.25821	12.6842	-3.94756	0.000115003	0.000924794	0.381273	Down
TSPO	-1.76358	11.406	-4.36921	2.15e-05	0.00021265	1.97051	Down
HOXB9	-3.77332	3.98126	-4.55172	1e-05	0.000107219	2.6984	Down
FPR1	-1.92012	10.7221	-2.83639	0.00511176	0.0248015	-3.13897	Down
FOLH1	1.64006	8.10177	2.49249	0.0136333	0.0560186	-4.01725	Up
SAT1	-1.53154	13.7806	-3.55396	0.00049028	0.00330613	-0.980263	Down
GADD45A	-1.50863	11.7219	-2.98275	0.00327275	0.0170114	-2.73383	Down
NOS1	4.65908	5.96316	4.92874	1.94e-06	2.46e-05	4.27474	Up
ITGA4	-2.79058	8.50753	-5.10544	8.7e-07	1.19e-05	5.04601	Down
BMP1	-2.14656	11.1367	-5.35883	2.67e-07	4.04e-06	6.18643	Down
ANTXR1	-1.72801	12.6982	-4.46734	1.43e-05	0.000147791	2.35895	Down
IGFBP4	-2.23567	12.1949	-4.77291	3.87e-06	4.57e-05	3.61158	Down
TRAF3	1.0135	10.3816	2.65121	0.00877105	0.0387909	-3.62485	Up
CPB2	1.07392	2.17695	2.32798	0.0210794	0.0800208	-4.40014	Up
CMKLR1	-1.43767	9.34948	-2.57855	0.0107605	0.0461028	-3.80727	Down
ADAMTS13	1.06917	8.08015	2.02302	0.0446227	0.146287	-5.04467	Up
HAS2	-3.83461	9.3303	-7.75121	7.65e-13	3.55e-11	18.6276	Down
TSGA10	1.08303	6.97623	3.21327	0.00156757	0.00901921	-2.05877	Up
ITFG1	1.37465	11.5778	4.35551	2.28e-05	0.000223707	1.9168	Up
CDC25C	-4.28527	7.57753	-7.90428	3.12e-13	1.54e-11	19.5071	Down
IL9	2.40694	0.873447	4.97025	1.61e-06	2.08e-05	4.45413	Up
FASN	1.90954	12.5038	4.17373	4.75e-05	0.000429757	1.2174	Up
CCL28	2.82999	4.20309	4.4401	1.61e-05	0.000163392	2.25043	Up
HAS1	3.69338	4.00465	4.78532	3.66e-06	4.35e-05	3.6638	Up
ETV7	-1.31236	6.51908	-2.0598	0.040927	0.136426	-4.97147	Down
COL22A1	-2.48757	9.32888	-3.1553	0.00189366	0.010601	-2.23275	Down
EMCN	-1.09799	8.68393	-2.68473	0.00797055	0.0358242	-3.53913	Down
FOXO4	1.70507	9.47709	4.1619	4.98e-05	0.000442098	1.1727	Up
SPINK5	1.84098	2.00844	3.35813	0.000966615	0.00600294	-1.6118	Up
THY1	1.76881	13.1993	4.06979	7.17e-05	0.000608319	0.828367	Up
