# Supplementary material for: Prognosis and immunoinfiltration analysis of angiogene-related genes in grade 4 diffuse gliomas
Source: Aging (Albany NY). 2023 Sep 21;15(18):9842–57. doi: 10.18632/aging.205054 (PMC10564429; doi:10.18632/aging.205054)
Supplement: Supplementary Table 2 [file aging-15-205054-s002.xls]

## Sheet: Sheet1
Supplementary Table 2. Risk scores for grade 4 diffuse glioma patients in TCGA.
Group.1	COL22A1*0.148	IGFBP2*0.234	MPO*0.145	Total
TCGA.06.0878.01A	1.50478	3.19213	0.29	4.98691
TCGA.26.5135.01A	1.4615	3.45914	0.407066	5.3277
TCGA.06.5859.01A	1.63487	2.63943	0.37482	4.64912
TCGA.06.2563.01A	1.08892	3.5094	0.37482	4.97314
TCGA.41.2571.01A	1.26207	3.58669	0.755371	5.60413
TCGA.28.5207.01A	1.4003	2.98863	0.636886	5.02581
TCGA.14.0871.01A	0.78224	2.77739	0.22982	3.78945
TCGA.16.1045.01B	1.33325	3.05754	0.704407	5.0952
TCGA.32.2632.01A	0.798063	3.50196	0.689459	4.98948
TCGA.06.0156.01A	1.46622	3.23092	0.879583	5.57672
TCGA.06.0141.01A	1.67228	3.28392	0.996203	5.95241
TCGA.06.2569.01A	1.09279	3.02571	0.536564	4.65506
TCGA.02.2485.01A	1.24709	3.34407	0.33668	4.92783
TCGA.06.0138.01A	1.25078	3.17197	0.536564	4.95931
TCGA.06.2564.01A	1.4474	3.34381	0.689459	5.48067
TCGA.28.5213.01A	1.08365	2.81743	0.552066	4.45314
TCGA.76.4928.01B	2.08147	3.82448	0.407066	6.31302
TCGA.76.4931.01A	1.56378	3.55614	0.536564	5.65648
TCGA.06.5856.01A	1.41802	3.46408	0.407066	5.28917
TCGA.19.2620.01A	1.43438	3.04719	0.592682	5.07425
TCGA.26.5132.01A	0.981145	3.39397	0.615949	4.99106
TCGA.06.0125.02A	1.57502	3.33718	0.604639	5.51684
TCGA.06.2558.01A	1.45574	3.24076	0.87	5.5665
TCGA.06.5414.01A	1.76553	3.32896	0.29	5.38449
TCGA.26.5133.01A	0.752945	3.03865	0.145	3.93659
TCGA.32.4213.01A	1.31911	3.28107	0.29	4.89018
TCGA.06.0210.01A	1.56518	3.81861	0.673359	6.05715
TCGA.06.5417.01A	0.776693	2.44823	0	3.22492
TCGA.19.2624.01A	1.57125	3.68129	0.704407	5.95695
TCGA.14.1823.01A	1.25798	2.71351	0.29	4.26149
TCGA.02.0055.01A	1.69202	3.45736	0.646618	5.79599
TCGA.32.1982.01A	1.00169	3.34312	0.536564	4.88138
TCGA.14.0736.02A	1.09909	2.97674	0.894639	4.97046
TCGA.06.2570.01A	1.51387	2.93166	0.145	4.59052
TCGA.06.0745.01A	1.62894	3.79558	0.51982	5.94433
TCGA.14.1402.02A	1.21063	3.42608	0.407066	5.04377
TCGA.14.0781.01B	1.65864	3.61896	0.926886	6.20448
TCGA.32.5222.01A	1.22418	3.50333	0.435	5.16251
TCGA.28.5204.01A	1.59246	3.57582	0.33668	5.50496
TCGA.06.5410.01A	1.46909	3.41724	0.856499	5.74283
TCGA.14.1829.01A	0.997737	3.03543	0.859957	4.89312
TCGA.02.0047.01A	1.49664	3.10247	0.536564	5.13567
TCGA.15.0742.01A	1.64742	3.64154	0.501618	5.79057
TCGA.19.2619.01A	1.45362	3.5061	0.48168	5.44141
TCGA.06.0168.01A	1.23627	2.61943	0.501618	4.35731
TCGA.19.1390.01A	1.37218	3.68247	0.407066	5.46172
TCGA.41.4097.01A	1.94539	3.4188	0.891713	6.2559
TCGA.06.0649.01B	1.58354	2.99673	0.929362	5.50963
TCGA.27.2526.01A	1.43464	3.32389	0.22982	4.98834
TCGA.27.2523.01A	1.39384	3.67832	0.435	5.50717
TCGA.06.5412.01A	1.66337	3.66739	0.48168	5.81244
TCGA.19.4065.01A	1.45196	3.45214	0.760949	5.66506
TCGA.06.0644.01A	1.93143	3.59661	0.407066	5.93511
TCGA.12.0821.01A	1.03433	3.48274	0.646618	5.16368
TCGA.28.1753.01A	1.32175	3.30185	0.655916	5.27952
TCGA.12.0619.01A	0.940918	3.40836	0.973566	5.32284
TCGA.14.0789.01A	1.38263	3.37441	0.536564	5.2936
TCGA.32.2634.01A	1.69447	3.29093	0.791618	5.77702
TCGA.06.0158.01A	1.6944	3.25329	0.51982	5.46751
TCGA.06.0152.02A	1.84581	3.43709	0.845769	6.12867
TCGA.12.0618.01A	1.44957	3.58607	0.934227	5.96987
TCGA.26.5139.01A	1.58672	3.56449	0.435	5.58621
TCGA.06.0747.01A	1.71651	3.38707	0.592682	5.69626
TCGA.32.2616.01A	1.85726	3.68708	0.33668	5.88102
TCGA.06.0129.01A	1.64464	2.44942	0.604639	4.6987
TCGA.76.4929.01A	1.7351	3.20164	0.673359	5.6101
TCGA.06.0157.01A	1.34806	3.3591	0.931808	5.63897
TCGA.28.5220.01A	1.34845	3.19266	0.501618	5.04273
TCGA.12.5295.01A	1.46533	3.52429	0.33668	5.3263
TCGA.06.0645.01A	1.21136	3.34216	0.655916	5.20944
TCGA.26.5134.01A	1.09909	2.93028	0.37482	4.40419
TCGA.32.2615.01A	1.67896	3.27354	0.62668	5.57917
TCGA.32.1980.01A	1.41151	3.20056	0.973566	5.58563
TCGA.26.1442.01A	0.958409	2.41848	0.636886	4.01378
TCGA.06.0187.01A	1.45527	3.34585	0.22982	5.03093
TCGA.14.0790.01B	1.24771	3.36534	0	4.61305
TCGA.14.2554.01A	1.33857	3.25612	0.615949	5.21064
TCGA.27.1834.01A	1.68812	2.71296	0.766383	5.16746
TCGA.28.2514.01A	1.21858	3.36485	0.936618	5.52005
TCGA.14.1825.01A	1.04578	2.96082	0.48168	4.48828
TCGA.12.1597.01B	1.12479	3.55631	0.536564	5.21766
TCGA.19.4065.02A	1.52394	3.07101	0.914048	5.509
TCGA.41.3915.01A	1.5519	3.39754	0.636886	5.58633
TCGA.06.2561.01A	1.38394	3.09477	0.459639	4.93835
TCGA.19.1787.01B	1.42782	2.68968	0.435	4.5525
TCGA.27.1830.01A	1.66381	3.2085	0.80982	5.68214
TCGA.06.0125.01A	1.71332	3.42748	0.407066	5.54787
TCGA.28.1747.01C	1.43669	3.12634	0.58	5.14303
TCGA.14.1034.02B	1.22139	3.43047	0.62668	5.27854
TCGA.41.2572.01A	1.19218	3.66079	0.37482	5.2278
TCGA.06.2567.01A	1.28869	2.72477	1.24042	5.25387
TCGA.06.0211.01A	1.03766	3.45976	0.33668	4.8341
TCGA.27.2528.01A	1.49058	3.59328	0.459639	5.5435
TCGA.06.0184.01A	0.855641	3.52034	0.673359	5.04934
TCGA.06.0744.01A	0.711489	3.42747	0.459639	4.59859
TCGA.06.0171.02A	1.35863	3.05247	0.849407	5.2605
TCGA.14.0787.01A	1.61052	3.34282	0.22982	5.18316
TCGA.06.2565.01A	1.52698	3.48684	0.704407	5.71822
TCGA.06.0178.01A	1.01863	2.4518	0.501618	3.97204
TCGA.06.2557.01A	1.40774	3.47815	0.737682	5.62357
TCGA.06.0211.02A	1.06844	3.41878	0.552066	5.03928
TCGA.06.0210.02A	1.59148	3.35793	0.536564	5.48597
TCGA.76.4927.01A	1.4336	3.41991	0.673359	5.52687
TCGA.06.5858.01A	1.15453	3.53652	0.501618	5.19267
TCGA.12.3653.01A	1.56208	3.57181	0.22982	5.36371
TCGA.28.2513.01A	1.41996	3.31921	0.852983	5.59215
TCGA.19.1389.02A	1.76868	3.67836	0.33668	5.78372
TCGA.12.3652.01A	1.25679	3.90317	0.592682	5.75264
TCGA.27.2524.01A	1.60847	3.82046	0.704407	6.13334
TCGA.14.0817.01A	0.924693	3.41221	0.566499	4.9034
TCGA.06.1804.01A	1.71945	2.63409	0.945916	5.29946
TCGA.26.5136.01B	1.43618	2.77184	0.33668	4.5447
TCGA.06.0646.01A	1.46799	3.27285	0.781886	5.52273
TCGA.28.5218.01A	1.95908	3.56695	1.09318	6.61922
TCGA.02.2483.01A	1.19851	3.64811	0.48168	5.3283
TCGA.06.2562.01A	1.89759	3.43274	0.435	5.76533
TCGA.27.1837.01A	1.37696	3.26581	0.501618	5.14439
TCGA.06.2559.01A	1.4118	3.41104	0.58	5.40283
TCGA.06.0221.02A	1.25017	2.77946	0.66482	4.69445
TCGA.06.0686.01A	1.22963	3.36225	0.814133	5.40601
TCGA.06.5416.01A	1.332	3.29988	0.91668	5.54856
TCGA.06.0238.01A	1.08231	3.10412	1.02144	5.20786
TCGA.14.1034.01A	1.20006	3.28693	0.814133	5.30112
TCGA.19.2629.01A	1.46036	2.59617	0.435	4.49153
TCGA.19.2625.01A	1.51046	3.23308	1.01663	5.76017
TCGA.06.0130.01A	1.39786	3.0884	0.936618	5.42288
TCGA.12.5299.01A	1.62304	3.73697	0.22982	5.58983
TCGA.06.0882.01A	1.38815	3.22716	0.969543	5.58485
TCGA.06.5413.01A	1.5219	3.52549	1.00324	6.05063
TCGA.76.4925.01A	1.72455	4.02245	0.29	6.037
TCGA.06.5418.01A	1.38263	3.46516	0.615949	5.46373
TCGA.06.0190.01A	1.42433	3.66363	0.934227	6.02219
TCGA.27.1835.01A	1.54479	3.23083	0.566499	5.34211
TCGA.28.5216.01A	1.52018	3.51797	0.646618	5.68477
TCGA.06.5411.01A	1.19298	3.39215	0.98519	5.57032
TCGA.27.2519.01A	1.62517	2.93405	0.22982	4.78904
TCGA.16.0846.01A	1.23298	2.71763	0.725	4.6756
TCGA.28.5209.01A	1.35113	3.52904	0	4.88017
TCGA.76.4926.01B	1.42541	3.24472	0.755371	5.4255
TCGA.06.0219.01A	1.27388	3.35872	0.749639	5.38224
TCGA.02.2486.01A	1.53854	3.25234	0.552066	5.34294
TCGA.06.0190.02A	1.29374	3.68262	0.681564	5.65792
TCGA.06.0750.01A	1.46172	3.57278	0.77168	5.80618
TCGA.15.1444.01A	1.4548	2.52475	0.501618	4.48117
TCGA.27.1832.01A	1.56574	3.42441	0.58	5.57015
TCGA.28.2499.01A	1.4562	3.29792	0.459639	5.21376
TCGA.19.0957.02A	1.16753	3.28679	0.891713	5.34603
TCGA.06.0174.01A	1.50496	3.7009	0.501618	5.70748
TCGA.12.0616.01A	1.41662	3.32078	0.592682	5.33008
TCGA.32.1970.01A	1.24015	3.32986	0.959133	5.52914
TCGA.28.5215.01A	1.73991	3.12963	0.796319	5.66586
TCGA.06.0132.01A	1.19694	2.78294	0.924381	4.90427
TCGA.06.5408.01A	1.53178	3.64869	0.646618	5.82708
TCGA.28.5208.01A	1.51704	3.46913	0.435	5.42118
TCGA.06.0211.01B	0.817487	3.50016	0.552066	4.86972
TCGA.28.2509.01A	1.56851	3.57424	0.145	5.28775
TCGA.19.5960.01A	1.29572	2.99786	0.681564	4.97515
TCGA.41.5651.01A	1.41007	3.25214	0.536564	5.19877
TCGA.27.2521.01A	1.49255	3.39725	0.145	5.0348
TCGA.12.3650.01A	1.09909	3.62246	0.33668	5.05823
TCGA.06.0743.01A	1.27168	3.19303	0.737682	5.2024
TCGA.76.4932.01A	1.63274	3.67051	0.145	5.44825
TCGA.08.0386.01A	1.42676	3.27453	0.834459	5.53575
TCGA.06.0749.01A	1.31911	2.73403	0.796319	4.84945
TCGA.27.1831.01A	0.967796	3.2465	0.51982	4.73411
TCGA.06.0139.01A	1.25321	2.64588	0.655916	4.55501
TCGA.32.2638.01A	1.26091	3.39062	0.673359	5.32489
