# Supplementary material for: Prognosis and immunoinfiltration analysis of angiogene-related genes in grade 4 diffuse gliomas
Source: Aging (Albany NY). 2023 Sep 21;15(18):9842–57. doi: 10.18632/aging.205054 (PMC10564429; doi:10.18632/aging.205054)
Supplement: Supplementary Table 3 [file aging-15-205054-s003.csv]

Supplementary Table 3. A set of DEGs of high-low risk group.
Genes	logFC	AveExpr	t	P.Value	adj.P.Val	B
COL22A1	1.967010033	9.409299069	8.882361478	1.05E-15	6.12E-11	24.88788235
IGFBP2	1.400385501	14.08527315	7.651272319	1.55E-12	4.53E-08	17.96715675
COL6A2	1.86945748	12.79249158	7.559330739	2.63E-12	5.11E-08	17.4678164
CCRN4L	0.832876296	7.775212909	7.461502895	4.58E-12	5.27E-08	16.93960454
FOSL1	1.445302755	8.239549322	7.415031759	5.97E-12	5.27E-08	16.68983341
SLC6A6	1.236009107	9.99665081	7.401563793	6.44E-12	5.27E-08	16.61758635
ATP6V1C2	0.662936169	6.602004801	7.397480234	6.59E-12	5.27E-08	16.59569317
COL6A1	1.36842034	13.95724432	7.381439218	7.22E-12	5.27E-08	16.50974899
GGN	1.06437161	6.58693446	7.332490177	9.51E-12	6.17E-08	16.2480517
SPRED3	1.272488733	9.461773685	7.285621005	1.24E-11	7.23E-08	15.99827417
MFSD2B	0.760477406	4.300767257	7.217327007	1.82E-11	8.91E-08	15.63574168
HSPA5	0.741296533	14.61991153	7.215698468	1.83E-11	8.91E-08	15.62711756
QSOX1	0.717368901	11.988254	7.176765218	2.28E-11	1.02E-07	15.42123396
FKBP9	0.956239486	12.65491765	7.1530155	2.60E-11	1.08E-07	15.29591949
UCN2	1.572943085	3.850375977	7.002761648	5.97E-11	2.19E-07	14.50806932
FBLIM1	1.309734538	9.998114619	6.993731792	6.28E-11	2.19E-07	14.460999
PDLIM7	0.87647601	10.88542572	6.990681885	6.38E-11	2.19E-07	14.44510783
PHLDA2	1.569201514	6.4797291	6.960073411	7.55E-11	2.34E-07	14.28582845
PMEPA1	0.987049175	11.85849789	6.957355537	7.67E-11	2.34E-07	14.27170312
AC093616.4	1.016585408	5.437665113	6.948739592	8.04E-11	2.34E-07	14.22694365
KIFC3	0.840057653	10.81019787	6.940011214	8.43E-11	2.34E-07	14.1816301
SLC35C1	0.705332296	10.25097537	6.907058971	1.01E-10	2.57E-07	14.01083128
PPM1J	0.924738216	6.616241348	6.9066633	1.01E-10	2.57E-07	14.00878307
ARL4C	1.103999239	12.33232927	6.894694313	1.08E-10	2.63E-07	13.94685458
VWA1	0.86556545	11.8263692	6.804942621	1.76E-10	4.05E-07	13.48432024
SFXN3	0.673890902	11.05577625	6.800798268	1.80E-10	4.05E-07	13.46304187
ELOVL6	0.694427645	10.01503369	6.775975488	2.06E-10	4.46E-07	13.33574257
FAM83G	1.451787781	5.954910203	6.760736908	2.24E-10	4.67E-07	13.25772066
STK32B	1.421222353	9.374805556	6.752075299	2.35E-10	4.72E-07	13.21341608
LDHA	0.835889569	14.62982391	6.71242507	2.91E-10	5.66E-07	13.01100391
DUSP5	1.192209577	9.380965594	6.690249826	3.27E-10	6.17E-07	12.89808912
ESPN	1.637564082	5.215490731	6.683686583	3.39E-10	6.19E-07	12.86470948
SLC22A18AS	1.063115805	4.585030917	6.66611389	3.73E-10	6.50E-07	12.77542762
MFSD10	0.664440812	11.46195857	6.658406356	3.89E-10	6.50E-07	12.73630936
MAP2K3	0.749238063	10.29561169	6.6535841	3.99E-10	6.50E-07	12.71184774
LGALS8	0.673012265	10.41257531	6.652542965	4.01E-10	6.50E-07	12.70656773
PLOD1	0.775905921	13.04437897	6.611772783	4.99E-10	7.87E-07	12.50017207
JMJD6	0.64420908	10.27790222	6.593477448	5.50E-10	8.45E-07	12.4077867
CD276	0.754817794	12.4888738	6.574255693	6.09E-10	9.12E-07	12.31087988
FAM20C	1.149834869	12.85581111	6.566551078	6.35E-10	9.27E-07	12.27208218
PXN	0.733168621	11.83837962	6.55979341	6.58E-10	9.37E-07	12.23807433
C11orf24	0.591951824	10.67685829	6.54731206	7.03E-10	9.61E-07	12.17531478
SLC43A3	0.813463779	10.45308385	6.542614249	7.21E-10	9.61E-07	12.15171067
HMGA1P8	0.765276738	3.473236011	6.541815486	7.24E-10	9.61E-07	12.14769825
P4HB	0.629417936	14.32032373	6.526171505	7.87E-10	1.02E-06	12.06917076
STK10	0.765228102	10.6295288	6.522896182	8.01E-10	1.02E-06	12.05274343
ITGA3	1.397447061	11.67286703	6.519038886	8.17E-10	1.02E-06	12.0334033
EHD4	0.717959032	10.89558422	6.511711074	8.50E-10	1.03E-06	11.99668045
METRNL	0.969209416	10.09246228	6.50759654	8.68E-10	1.03E-06	11.97607118
DCBLD2	1.036462875	10.95072762	6.493651917	9.35E-10	1.09E-06	11.90627993
SLC20A1	0.93715677	11.50611312	6.472814705	1.04E-09	1.19E-06	11.80215354
HSP90B1	0.668177356	14.61617715	6.459346366	1.12E-09	1.23E-06	11.73495377
AC009299.5	0.861350294	5.381522071	6.453635715	1.16E-09	1.23E-06	11.70648526
LOXL2	1.190518569	10.98960199	6.450717541	1.17E-09	1.23E-06	11.69194337
AC108463.2	1.098121453	4.336183796	6.448824035	1.18E-09	1.23E-06	11.68250966
ITGB3	1.193231936	6.977000969	6.44864406	1.19E-09	1.23E-06	11.68161309
SLC39A13	0.626428821	10.96207311	6.444814278	1.21E-09	1.23E-06	11.66253784
PDIA4	0.751725251	13.28567507	6.443032978	1.22E-09	1.23E-06	11.65366785
FGFR1	0.890530452	12.27855113	6.438353784	1.25E-09	1.24E-06	11.63037462
SLC16A3	1.081135196	11.24744767	6.431369055	1.30E-09	1.26E-06	11.59562272
PLOD3	0.776945888	12.34958345	6.41777784	1.40E-09	1.34E-06	11.5280641
COL18A1	1.052008797	11.88083112	6.409750953	1.46E-09	1.35E-06	11.48820374
TPM2	1.021661714	11.44528126	6.408701795	1.46E-09	1.35E-06	11.48299594
ADAM12	1.250096272	10.16785981	6.404355969	1.50E-09	1.35E-06	11.46142949
RP11-49I11.4	1.043093423	2.580976678	6.403890976	1.50E-09	1.35E-06	11.45912244
STC1	1.495037454	8.818404644	6.391399982	1.60E-09	1.42E-06	11.3971856
LMNA	0.816108173	12.72489016	6.373539348	1.76E-09	1.53E-06	11.3087471
CHPF	0.886123952	12.90783942	6.360261252	1.89E-09	1.60E-06	11.24309421
HES2	1.462257525	3.551907392	6.359288671	1.90E-09	1.60E-06	11.23828852
ITGA5	0.986929311	11.64799965	6.352194404	1.97E-09	1.64E-06	11.20324767
MGAT4B	0.67625379	11.90889405	6.327597867	2.24E-09	1.84E-06	11.08193741
PVT1	0.782705737	8.19076261	6.309666909	2.46E-09	1.99E-06	10.99367851
ENO1	0.67028675	16.02065647	6.305071162	2.52E-09	2.01E-06	10.97108161
ABL2	0.74828209	10.39923172	6.302059805	2.56E-09	2.02E-06	10.95628037
BHLHE40	1.045413062	11.91791123	6.298424973	2.60E-09	2.03E-06	10.9384203
OSBPL5	0.754587573	10.21623108	6.29542655	2.65E-09	2.03E-06	10.92369192
VDAC1	0.523142975	13.12703879	6.28719475	2.76E-09	2.09E-06	10.88327857
VEGFA	1.450557779	13.67945877	6.279604488	2.87E-09	2.15E-06	10.84604291
PIM3	0.691005133	10.48271076	6.273542214	2.96E-09	2.19E-06	10.81632253
IMPDH1	0.699335804	10.8404515	6.268769808	3.04E-09	2.22E-06	10.79293788
ORAI2	0.708364402	11.89631859	6.261015824	3.16E-09	2.27E-06	10.75496643
RP11-626G11.6	0.954344937	3.129238153	6.259297962	3.19E-09	2.27E-06	10.74655784
B3GNT7	1.099986961	8.694817968	6.252331757	3.31E-09	2.32E-06	10.71247396
MYADM	0.851536033	11.37411893	6.250851073	3.33E-09	2.32E-06	10.70523229
NDRG1	1.257771435	13.39754789	6.241111784	3.51E-09	2.41E-06	10.65762562
ZYX	0.891712685	13.83008498	6.237801059	3.57E-09	2.42E-06	10.64145266
ADSSL1	0.910378949	8.674633726	6.231331841	3.69E-09	2.46E-06	10.60986539
UTP3	0.603598989	9.962676737	6.230006368	3.71E-09	2.46E-06	10.60339595
TEAD3	0.937763063	9.180371233	6.22330296	3.84E-09	2.52E-06	10.57069035
PELO	0.520817405	10.0447256	6.212444483	4.07E-09	2.61E-06	10.51775771
LENG9	0.827805153	6.607781373	6.210734996	4.10E-09	2.61E-06	10.50942946
LRRFIP1	0.647792476	11.26241094	6.210193891	4.11E-09	2.61E-06	10.5067936
SEC24D	0.68307051	10.6394842	6.202398644	4.28E-09	2.67E-06	10.46883651
RP11-334L9.1	0.560157601	5.590803394	6.201678885	4.30E-09	2.67E-06	10.46533328
SYT8	1.349287884	1.951499328	6.198809562	4.36E-09	2.68E-06	10.45137009
MDK	0.920131142	12.62184759	6.194938459	4.45E-09	2.70E-06	10.4325381
INF2	0.727072778	11.41849453	6.193099635	4.49E-09	2.70E-06	10.42359517
PPAPDC1B	0.571234805	10.31933431	6.189368077	4.58E-09	2.73E-06	10.40545211
CTTN	0.6557871	12.46826407	6.176280547	4.90E-09	2.89E-06	10.34187248
ERO1L	0.818799264	10.90302197	6.166668413	5.15E-09	3.01E-06	10.29522883
BET1L	0.573103237	11.04561159	6.164542422	5.20E-09	3.01E-06	10.28491829
LIMK1	0.771026264	12.1920237	6.162001567	5.27E-09	3.02E-06	10.27259862
PPFIBP1	0.763614472	10.55464461	6.153656407	5.50E-09	3.11E-06	10.23215792
RP11-274H2.5	0.918407434	4.98584536	6.152105066	5.55E-09	3.11E-06	10.22464382
FHL2	1.191883238	8.677430838	6.149914308	5.61E-09	3.12E-06	10.2140346
LDHAP5	0.717628857	4.398485101	6.146630052	5.71E-09	3.14E-06	10.19813424
LDHAP7	0.831010586	4.57574621	6.141255486	5.87E-09	3.20E-06	10.17212512
AIFM2	0.772874219	8.72778751	6.139519578	5.92E-09	3.20E-06	10.16372753
EMILIN2	1.044953547	9.839451278	6.133219715	6.11E-09	3.26E-06	10.13326374
CCM2	0.640547006	11.41589215	6.132560285	6.13E-09	3.26E-06	10.1300761
GAPDHP72	0.582530492	6.701334149	6.126095856	6.34E-09	3.31E-06	10.09883861
MICALL2	0.979730566	11.04948242	6.125799801	6.35E-09	3.31E-06	10.0974085
ZDHHC5	0.566345792	11.22977161	6.119737721	6.55E-09	3.38E-06	10.06813458
ADAMTS1	1.118633295	10.47004528	6.112383035	6.80E-09	3.46E-06	10.03264265
MANF	0.587616025	11.22576812	6.112087405	6.81E-09	3.46E-06	10.03121656
TPM4	0.693745505	13.98075988	6.102981776	7.13E-09	3.59E-06	9.987312862
SURF4	0.58592641	13.31641343	6.101541443	7.19E-09	3.59E-06	9.980371858
PYGL	0.848479061	11.59581638	6.094765937	7.44E-09	3.68E-06	9.947734138
ACTBP9	0.565920391	5.221627889	6.091362758	7.57E-09	3.71E-06	9.931349445
HSP90B2P	0.511338815	5.954512919	6.089933861	7.63E-09	3.71E-06	9.924471676
SH3D21	0.980375213	7.968089935	6.086936427	7.74E-09	3.74E-06	9.910047251
ANGPTL4	1.520610986	10.70835385	6.08297098	7.90E-09	3.76E-06	9.89097127
SUSD2	1.067281781	8.741487676	6.082283937	7.93E-09	3.76E-06	9.887666997
CTD-2540F13.2	1.097157998	2.328106007	6.077086559	8.14E-09	3.83E-06	9.862678192
GRB10	1.04822423	11.65913973	6.05350408	9.18E-09	4.29E-06	9.749461507
IER5L	0.956032756	9.625099807	6.039740539	9.85E-09	4.55E-06	9.683511282
PDIA3P1	0.55780689	8.556207915	6.038639093	9.90E-09	4.55E-06	9.678237578
TMEM63B	0.732459612	11.22824651	6.034246378	1.01E-08	4.62E-06	9.657211328
PDIA6	0.640755912	12.91987716	6.026532928	1.05E-08	4.77E-06	9.620313162
EPHA1	0.924573473	6.102686821	6.023006239	1.07E-08	4.81E-06	9.603452694
ACTG1	0.531068538	17.11772147	6.018064644	1.10E-08	4.86E-06	9.579838226
CKAP4	0.684995686	11.90954712	6.017558184	1.10E-08	4.86E-06	9.577418687
PTPN1	0.595631928	11.32348719	6.015586851	1.11E-08	4.86E-06	9.568002145
GAPDHP60	0.606173065	6.759417497	6.01493898	1.12E-08	4.86E-06	9.564907852
COL16A1	0.994725255	11.43187729	6.008530734	1.15E-08	4.99E-06	9.534312786
TMEM214	0.545902524	11.61740084	6.005801687	1.17E-08	5.00E-06	9.521289641
PVR	0.714495719	10.09861954	6.00509377	1.17E-08	5.00E-06	9.517912036
BCL3	0.976943171	9.831100182	5.999539098	1.21E-08	5.11E-06	9.491418332
SMAGP	0.952065087	7.298943043	5.996128853	1.23E-08	5.16E-06	9.47516039
PLXNA1	0.898732082	11.69114287	5.98655887	1.29E-08	5.38E-06	9.429567713
HDLBP	0.627523254	13.88223176	5.981420915	1.32E-08	5.48E-06	9.40510876
SOCS3	1.306774422	11.57795756	5.976190135	1.36E-08	5.56E-06	9.380221535
YWHAG	0.617611906	13.74049264	5.975617695	1.36E-08	5.56E-06	9.377498792
GANAB	0.567175292	14.09034605	5.972154395	1.39E-08	5.62E-06	9.361029524
MAFK	0.888638904	9.575206784	5.965949065	1.43E-08	5.73E-06	9.331535997
FURIN	0.731120184	11.55556584	5.96566303	1.43E-08	5.73E-06	9.330176959
MCL1	0.602775056	13.66055692	5.959026384	1.48E-08	5.88E-06	9.298655843
ASB1	0.625185608	10.73491798	5.945954283	1.58E-08	6.22E-06	9.236634235
PLD3	0.599803082	13.53842282	5.94529552	1.59E-08	6.22E-06	9.233510967
LAMC1	0.869663892	12.69661262	5.922888527	1.78E-08	6.91E-06	9.127408068
RP5-1059L7.1	0.891007554	5.653279188	5.920134581	1.80E-08	6.96E-06	9.114385021
B3GALT6	0.604357424	10.52629907	5.916486505	1.83E-08	7.04E-06	9.097139702
SH3PXD2B	0.873150136	12.05348121	5.914506163	1.85E-08	7.07E-06	9.087780998
ARHGDIA	0.530815651	13.21757682	5.91094367	1.89E-08	7.15E-06	9.070950387
LOXL3	0.661355952	10.54544064	5.90592428	1.93E-08	7.28E-06	9.047247819
MIR210HG	1.156065357	8.123455626	5.904566465	1.95E-08	7.28E-06	9.040838151
ADORA2B	0.83636126	8.14285001	5.903572831	1.96E-08	7.28E-06	9.036148226
CERCAM	0.768075785	11.46467894	5.902282094	1.97E-08	7.28E-06	9.030056736
PDCL3P5	0.687058964	3.747518732	5.898227069	2.01E-08	7.38E-06	9.010925035
PTPN12	0.649722129	12.06742711	5.896759123	2.02E-08	7.39E-06	9.00400131
IKBIP	0.632055797	9.961777409	5.887766749	2.12E-08	7.68E-06	8.961611865
FAM129B	0.869739915	12.25016054	5.886519974	2.13E-08	7.68E-06	8.955737925
PFKFB4	0.78052614	10.19662113	5.883695245	2.16E-08	7.74E-06	8.942432704
NDEL1	0.537134488	10.55304984	5.880392294	2.20E-08	7.82E-06	8.926880125
AP000695.4	0.969908629	3.630596163	5.874890947	2.26E-08	7.99E-06	8.900988413
LETM2	0.612540015	7.731558226	5.862881464	2.40E-08	8.39E-06	8.844520703
ZDHHC18	0.577787806	10.35319139	5.862762405	2.40E-08	8.39E-06	8.843961269
LOXL1	1.309335709	9.047332945	5.858178755	2.45E-08	8.53E-06	8.822429158
GAPDH	0.661940293	17.4144315	5.854071318	2.51E-08	8.66E-06	8.803143311
CD248	1.019397648	10.49110988	5.849665579	2.56E-08	8.77E-06	8.782466526
TGFB1I1	0.742007207	10.65300485	5.846732779	2.60E-08	8.77E-06	8.768708019
MXRA7	0.82620729	12.48438354	5.846565092	2.60E-08	8.77E-06	8.767921492
FRMD8	0.577908453	11.0347471	5.845773042	2.61E-08	8.77E-06	8.764206617
SERPINE1	1.45741103	12.52851295	5.845654054	2.61E-08	8.77E-06	8.76364857
LZTS1	1.139690638	10.92363925	5.844122991	2.63E-08	8.78E-06	8.75646859
PLAT	0.971110647	11.84381437	5.841508397	2.67E-08	8.85E-06	8.744210152
GAPDHP71	0.583118607	5.578911697	5.838602099	2.71E-08	8.93E-06	8.730588229
ADM	1.357657119	10.79649922	5.830886232	2.81E-08	9.21E-06	8.694444928
NXPH4	1.131970773	8.519425667	5.82998352	2.82E-08	9.21E-06	8.690218385
FCHSD1	0.781618222	9.218427956	5.827171834	2.86E-08	9.26E-06	8.677056653
ACTB	0.556473503	18.14648043	5.82631309	2.88E-08	9.26E-06	8.673037623
NANS	0.500294334	10.44167676	5.82560494	2.89E-08	9.26E-06	8.669723678
RHBDF1	0.758290182	10.23928513	5.823389532	2.92E-08	9.27E-06	8.65935787
RP11-479G22.8	0.831811029	5.654935194	5.82330395	2.92E-08	9.27E-06	8.658957482
KIRREL	0.908336015	10.70591684	5.818608707	2.99E-08	9.43E-06	8.636997269
GALNT11	0.59016681	11.27757066	5.814198824	3.06E-08	9.56E-06	8.616382168
FNDC4	0.684038862	11.50977767	5.813777196	3.06E-08	9.56E-06	8.61441169
TSPAN17	0.550490474	11.05089288	5.811918502	3.09E-08	9.57E-06	8.605726203
RP11-268J15.5	1.003194731	7.153035966	5.811344648	3.10E-08	9.57E-06	8.603045008
ACTBP7	0.479448487	6.200372817	5.80282054	3.23E-08	9.88E-06	8.563238355
GAPDHP65	0.576165634	8.343326698	5.802807078	3.23E-08	9.88E-06	8.563175517
PARVA	0.63482053	11.22537944	5.799236886	3.29E-08	1.00E-05	8.54651441
MAFF	0.912326592	9.730105889	5.798140771	3.31E-08	1.00E-05	8.541400476
AADAT	0.633659126	8.817832267	5.795315904	3.35E-08	1.01E-05	8.52822394
MYL9	0.932569124	11.26135292	5.782278543	3.58E-08	1.07E-05	8.467465541
RPP25	0.748612439	7.714139036	5.780522284	3.61E-08	1.08E-05	8.459287607
PCSK1	1.399447974	9.329606732	5.774019723	3.73E-08	1.10E-05	8.429022843
AC108463.1	0.946905221	3.470689931	5.771957851	3.77E-08	1.11E-05	8.419430948
USO1	0.501137145	11.42468884	5.766518371	3.87E-08	1.14E-05	8.394137035
PGPEP1	0.678647317	11.5165924	5.764089103	3.92E-08	1.14E-05	8.382845819
EVC	1.132660137	8.94375172	5.763742273	3.92E-08	1.14E-05	8.38123401
AFAP1	0.772948035	11.1445104	5.760219675	3.99E-08	1.15E-05	8.364867174
HARS	0.491526676	11.63754346	5.757611004	4.04E-08	1.16E-05	8.352750878
RP11-435F17.3	0.447300779	5.550207278	5.755774486	4.08E-08	1.16E-05	8.344223095
HDAC7	0.672916917	11.27480361	5.755532984	4.08E-08	1.16E-05	8.343101826
ACTG1P9	0.462377301	5.354010416	5.754679308	4.10E-08	1.16E-05	8.339138537
RUNX1	1.001263201	10.57811983	5.75402574	4.11E-08	1.16E-05	8.336104533
H6PD	0.840739964	11.60737743	5.749528374	4.21E-08	1.18E-05	8.315232897
TRAM2	0.840364147	10.13102081	5.744896632	4.30E-08	1.20E-05	8.293748813
PKM	0.613485764	15.94099774	5.741030156	4.39E-08	1.22E-05	8.275823066
GPI	0.651131396	13.82066833	5.734233122	4.54E-08	1.24E-05	8.244329853
PKD2	0.661215286	10.67167636	5.734158407	4.54E-08	1.24E-05	8.243983807
PTRF	0.96650881	12.77912866	5.733844775	4.54E-08	1.24E-05	8.242531236
ARCN1	0.512309264	12.5675674	5.733670584	4.55E-08	1.24E-05	8.241724497
ATG9B	1.094761794	6.959668536	5.732593341	4.57E-08	1.24E-05	8.236735794
TRIM3	0.589686517	9.588287585	5.731650905	4.59E-08	1.24E-05	8.232371888
LRRC8E	1.104895217	2.061725406	5.730783466	4.61E-08	1.24E-05	8.228355668
BEAN1	1.292416054	6.989919327	5.730762972	4.61E-08	1.24E-05	8.228260784
RAI14	0.736335559	10.41138697	5.726622644	4.71E-08	1.26E-05	8.20909671
RNF10	0.5226252	12.72210671	5.721227048	4.84E-08	1.28E-05	8.184136118
OXCT2	1.038622398	2.456020794	5.720165791	4.86E-08	1.28E-05	8.179228453
KDELR2	0.562769303	13.36018022	5.719684343	4.87E-08	1.28E-05	8.177002248
LBH	0.781855833	11.15769227	5.719100406	4.89E-08	1.28E-05	8.174302303
SIAH2	0.520913636	10.28627671	5.71819706	4.91E-08	1.28E-05	8.170125861
WDR55	0.502225716	10.15341122	5.716435388	4.95E-08	1.28E-05	8.161982374
TCAF2	1.069172857	8.045666843	5.715830828	4.97E-08	1.28E-05	8.159188119
MXRA5	1.436544525	9.762192983	5.708988278	5.13E-08	1.32E-05	8.127575675
VMP1	0.634505657	12.56743616	5.70869426	5.14E-08	1.32E-05	8.126217877
EGR1	1.077844	13.41979103	5.705211471	5.23E-08	1.33E-05	8.11013759
LDHAP3	0.834998499	4.556544208	5.703675202	5.27E-08	1.33E-05	8.103046581
KIF26B	0.964130044	9.459809833	5.703663389	5.27E-08	1.33E-05	8.10299206
TMED9	0.503903874	12.88915104	5.701400571	5.33E-08	1.33E-05	8.092549801
HK1	0.648616779	12.27320796	5.700961018	5.34E-08	1.33E-05	8.09052171
HSP90AB1	0.556969276	15.20691506	5.700770962	5.35E-08	1.33E-05	8.089644821
SLC27A3	0.844970773	10.47515009	5.69624759	5.47E-08	1.36E-05	8.068780468
CAPN12	1.053528078	3.565334389	5.689405225	5.65E-08	1.39E-05	8.037240389
SRF	0.689076715	11.00467979	5.689255569	5.66E-08	1.39E-05	8.036550826
RAB13	0.650500999	12.15436639	5.687912725	5.69E-08	1.40E-05	8.030363997
RARS	0.478719249	10.91800141	5.683793102	5.81E-08	1.42E-05	8.011389846
LAMB1	1.065787888	11.84173949	5.679844518	5.92E-08	1.44E-05	7.993212005
TSPAN9	0.832565262	10.57061071	5.679403629	5.94E-08	1.44E-05	7.991182832
KBTBD2	0.560211826	11.72287841	5.676310514	6.03E-08	1.45E-05	7.976949826
SEC61A1	0.550041248	14.18506676	5.675236272	6.06E-08	1.46E-05	7.972007892
SCARB2	0.537508779	13.82082726	5.674446229	6.08E-08	1.46E-05	7.968373779
ARID5A	0.672414946	10.85882607	5.672705456	6.13E-08	1.46E-05	7.96036759
CEP112	0.763267423	8.735487744	5.665476986	6.35E-08	1.50E-05	7.927139727
FSCN1	0.708051025	13.85227071	5.665374024	6.36E-08	1.50E-05	7.926666634
AP000892.6	1.025714324	6.656328334	5.664018261	6.40E-08	1.51E-05	7.920437664
TRIM32	0.604536001	9.610163433	5.660371454	6.51E-08	1.53E-05	7.903687529
FSTL3	0.858504683	9.475905325	5.659255683	6.55E-08	1.53E-05	7.89856412
LRP12	0.683960588	9.644210517	5.656017249	6.65E-08	1.55E-05	7.88369763
COPG1	0.509517536	12.78438936	5.654300903	6.71E-08	1.55E-05	7.875820797
C8orf58	0.523255048	8.78326585	5.654251281	6.71E-08	1.55E-05	7.875593086
PARVB	0.72468872	10.12339836	5.653790897	6.73E-08	1.55E-05	7.873480526
GAPDHP1	0.616328371	9.986882039	5.651259096	6.81E-08	1.56E-05	7.861864916
INVS	0.626052822	8.835214099	5.64695373	6.96E-08	1.58E-05	7.84212033
PHLDA1	0.793572906	13.08738926	5.646268295	6.98E-08	1.58E-05	7.838977822
P3H1	0.66783253	10.61675178	5.646081071	6.98E-08	1.58E-05	7.838119502
CHPF2	0.639221323	11.64340149	5.644088234	7.05E-08	1.59E-05	7.828984597
WI2-87327B8.2	1.388552637	3.683219824	5.634879915	7.38E-08	1.66E-05	7.786802743
TMEM194B	0.518091883	7.917653867	5.631360882	7.50E-08	1.68E-05	7.770694727
CUL7	0.727882619	10.40832094	5.630767341	7.53E-08	1.68E-05	7.767978512
ACTN4	0.701908129	13.69840783	5.628894728	7.59E-08	1.69E-05	7.759410153
TUBB6	0.948043367	11.32734713	5.626648193	7.68E-08	1.70E-05	7.749133378
ACTBP2	0.478188733	7.955742828	5.623324078	7.80E-08	1.72E-05	7.733932235
SEMA4F	0.831234204	9.20443451	5.622816628	7.82E-08	1.72E-05	7.731612198
OGFOD3	0.510030349	10.44902945	5.61826345	8.00E-08	1.75E-05	7.710801549
KCTD10	0.509729045	11.08176612	5.614661531	8.14E-08	1.77E-05	7.694346678
TSPAN4	0.565885577	10.4097234	5.611122148	8.28E-08	1.79E-05	7.678184366
PTPN9	0.618509121	11.49125328	5.610638342	8.30E-08	1.79E-05	7.675975634
ERGIC1	0.521655458	12.98854325	5.610617037	8.30E-08	1.79E-05	7.675878375
GAPDHP40	0.557711449	6.700709598	5.607200407	8.44E-08	1.81E-05	7.660284004
ST3GAL2	0.553767331	10.81783213	5.6063059	8.48E-08	1.81E-05	7.656202297
MESDC1	0.566367455	9.372774564	5.603670546	8.58E-08	1.83E-05	7.644179498
DLGAP4	0.626762961	12.30434575	5.599723335	8.75E-08	1.85E-05	7.62617893
RP5-1120P11.1	1.101170504	5.137308753	5.599339529	8.77E-08	1.85E-05	7.624429105
INHA	0.934108153	5.667025331	5.594155572	8.99E-08	1.89E-05	7.600802567
RP11-290H9.4	0.992422917	3.610872818	5.593560426	9.02E-08	1.89E-05	7.598091049
SLC26A2	0.734426861	10.12888679	5.593306779	9.03E-08	1.89E-05	7.596935483
SLC22A23	0.784288262	10.51056705	5.587717574	9.27E-08	1.93E-05	7.571481002
RARA	0.694354012	10.84822346	5.587263818	9.29E-08	1.93E-05	7.569415248
ACTBP11	0.47167718	6.132366305	5.587010966	9.31E-08	1.93E-05	7.568264169
CYB561	0.772941887	10.25519834	5.586123857	9.35E-08	1.93E-05	7.564225989
PSMD11	0.498715423	11.91721692	5.584059133	9.44E-08	1.94E-05	7.554828895
VDAC1P1	0.540560275	5.504562692	5.582132378	9.53E-08	1.94E-05	7.54606184
SPAG4	1.127404582	7.673844861	5.582009155	9.53E-08	1.94E-05	7.545501224
RP11-39C10.1	0.499782111	4.935121744	5.581584121	9.55E-08	1.94E-05	7.54356755
P4HA1	0.715464086	11.48470346	5.580992959	9.58E-08	1.94E-05	7.54087825
ABHD2	0.838892636	12.51262839	5.579866092	9.63E-08	1.95E-05	7.535752462
TLCD2	0.934531836	7.347601435	5.575035508	9.86E-08	1.97E-05	7.51378743
TP73-AS1	0.384559106	5.24920137	5.574444584	9.89E-08	1.97E-05	7.511101332
ACTG1P14	0.435540441	5.668383522	5.574410131	9.89E-08	1.97E-05	7.510944727
PKMP1	0.553015899	6.190476384	5.57409491	9.91E-08	1.97E-05	7.509511947
FER1L4	1.400635619	6.698680912	5.573498719	9.94E-08	1.97E-05	7.506802215
MSANTD3	0.592679496	10.0770565	5.572836977	9.97E-08	1.97E-05	7.50379478
GNPNAT1	0.57339361	9.63392588	5.571700177	1.00E-07	1.97E-05	7.49862889
USB1	0.531516396	11.14056809	5.571643395	1.00E-07	1.97E-05	7.498370877
ZNF343	0.649623572	8.536476124	5.569191602	1.01E-07	1.99E-05	7.487231846
PDCL3	0.449100046	9.763388634	5.568480648	1.02E-07	1.99E-05	7.484002442
GS1-44D20.1	0.686822436	5.565372957	5.564882966	1.04E-07	2.01E-05	7.467664755
GAPDHP44	0.583407801	4.964866894	5.564451729	1.04E-07	2.01E-05	7.465706911
ADAMTS14	1.288510271	7.969502644	5.564191482	1.04E-07	2.01E-05	7.464525424
COL5A1	1.43249728	10.98191726	5.563276924	1.04E-07	2.01E-05	7.460373744
AC144831.3	0.893470138	3.474082806	5.556963977	1.08E-07	2.07E-05	7.431728339
B4GALT2	0.523318344	11.84469961	5.549043797	1.12E-07	2.12E-05	7.395821026
GAPDHP38	0.56382645	5.816860573	5.548596651	1.12E-07	2.12E-05	7.393794855
DCUN1D3	0.590909131	8.964002033	5.548012694	1.12E-07	2.12E-05	7.391148909
SEPN1	0.7573047	13.75056768	5.547983245	1.12E-07	2.12E-05	7.39101548
EIF4A1P2	0.502855227	5.927089217	5.547580583	1.13E-07	2.12E-05	7.389191108
GAPDHP63	0.525307598	7.088729942	5.547414466	1.13E-07	2.12E-05	7.388438499
CDC42SE1	0.472642025	12.37641599	5.545972593	1.13E-07	2.13E-05	7.381906565
RP11-124N14.3	0.736313868	7.36364436	5.544555796	1.14E-07	2.14E-05	7.375489347
CALR	0.509925758	15.24718968	5.540047707	1.17E-07	2.17E-05	7.355077848
SPHK1	0.957139544	9.088134429	5.53850914	1.18E-07	2.17E-05	7.348114172
MMP19	1.415220198	8.332657491	5.538422658	1.18E-07	2.17E-05	7.347722786
RP11-49I11.1	1.010833912	3.475830529	5.538386935	1.18E-07	2.17E-05	7.347561119
ULBP2	0.896693241	6.559439448	5.535612268	1.19E-07	2.19E-05	7.335006243
CDC42EP3	0.834654144	9.558934138	5.534952338	1.20E-07	2.19E-05	7.332020803
SH3D19	0.842645029	10.14958447	5.533663161	1.20E-07	2.19E-05	7.326189423
RP11-603J24.7	0.633598704	6.385112278	5.533487147	1.21E-07	2.19E-05	7.325393326
ANKRD13D	0.536366067	10.46282339	5.533412873	1.21E-07	2.19E-05	7.325057395
SYNJ2	0.963261189	9.706890743	5.530920294	1.22E-07	2.21E-05	7.313785575
SCMH1	0.53273782	10.55816197	5.530878115	1.22E-07	2.21E-05	7.313594865
HSP90B3P	0.589923953	4.529966843	5.528474236	1.23E-07	2.22E-05	7.302727472
NUCB2	0.589355788	10.7802071	5.527988643	1.24E-07	2.22E-05	7.300532608
THAP4	0.494031161	10.96264073	5.52651167	1.25E-07	2.23E-05	7.293857528
RP11-90L1.8	0.745717056	3.914316439	5.526159334	1.25E-07	2.23E-05	7.292265348
LRRC59	0.465967812	12.42054482	5.525372046	1.25E-07	2.23E-05	7.288707905
PTPRH	1.212402627	6.541901993	5.525145508	1.25E-07	2.23E-05	7.287684329
C9orf89	0.664151541	9.98670692	5.522890192	1.27E-07	2.24E-05	7.27749562
RP9P	0.633822766	9.05430021	5.520353596	1.28E-07	2.26E-05	7.266039562
ULBP3	0.971844114	5.009005144	5.519078343	1.29E-07	2.27E-05	7.260281463
FAM184B	1.058097669	7.207848074	5.518773103	1.29E-07	2.27E-05	7.258903362
FUT11	0.545192584	9.606222061	5.518251957	1.30E-07	2.27E-05	7.256550602
ZPR1	0.484116933	11.10838081	5.51525809	1.32E-07	2.28E-05	7.243037439
STAC2	1.346770884	9.687733438	5.514714103	1.32E-07	2.28E-05	7.240582625
TRIM44	0.627295305	11.7999999	5.514434029	1.32E-07	2.28E-05	7.239318818
CHSY1	0.681790693	11.08662628	5.513858391	1.32E-07	2.28E-05	7.236721442
LL21NC02-21A1.1	0.926498724	4.208279782	5.512912562	1.33E-07	2.28E-05	7.232454101
RP5-875H18.9	1.498679633	2.805176106	5.512865669	1.33E-07	2.28E-05	7.232242544
KLF16	0.650893675	9.936407109	5.511697621	1.34E-07	2.29E-05	7.226973329
GAPDHP21	0.591782094	4.509218391	5.511044468	1.34E-07	2.29E-05	7.224027199
THEM5	1.212537423	4.708872888	5.510830647	1.34E-07	2.29E-05	7.223062783
ADAMTSL4	0.912513393	8.513100124	5.509774396	1.35E-07	2.29E-05	7.218299054
TNIP1	0.582074406	12.14646233	5.509147906	1.35E-07	2.29E-05	7.215473858
TRIO	0.878538801	12.83668643	5.508253368	1.36E-07	2.29E-05	7.211440256
ZNF330	0.487391074	10.18416603	5.507973273	1.36E-07	2.29E-05	7.210177358
PIGS	0.49930456	11.50071368	5.506069028	1.37E-07	2.31E-05	7.201592627
TIMP1	1.110263776	13.82038811	5.505279783	1.38E-07	2.31E-05	7.198035135
CRELD2	0.620419461	10.63176411	5.501105726	1.41E-07	2.34E-05	7.179226494
C9orf69	0.563438685	10.75069275	5.50055831	1.41E-07	2.34E-05	7.176760513
UAP1L1	0.715228391	10.43431532	5.500502628	1.41E-07	2.34E-05	7.176509686
SLC35E4	0.712225268	8.213367921	5.500098879	1.41E-07	2.34E-05	7.174691011
DGKA	0.543858497	9.62134777	5.49781906	1.43E-07	2.36E-05	7.164423333
EFEMP2	0.828638549	12.10120822	5.496881099	1.44E-07	2.36E-05	7.160199857
SLC4A3	0.750562754	11.36147912	5.496339082	1.44E-07	2.36E-05	7.15775947
VIM	0.712511323	16.86572567	5.49317785	1.46E-07	2.39E-05	7.143529546
SLCO4A1-AS1	1.464116078	5.009183097	5.492243648	1.47E-07	2.40E-05	7.13932541
WNT10A	1.327668284	4.668107002	5.490599721	1.48E-07	2.41E-05	7.13192852
HMGA1	0.784878036	12.1745873	5.489356043	1.49E-07	2.42E-05	7.12633356
ANKH	0.685332878	11.64419712	5.487619834	1.50E-07	2.43E-05	7.118524287
LINC00941	1.469992634	5.047369131	5.486495128	1.51E-07	2.44E-05	7.113466381
NCLN	0.603626787	11.56517761	5.48590631	1.51E-07	2.44E-05	7.110818694
SLC52A2	0.551430005	11.02733577	5.483663939	1.53E-07	2.45E-05	7.100737394
SNAI1	1.061222873	6.843613045	5.481687512	1.55E-07	2.47E-05	7.091854056
FAM3C2	0.687251866	7.310743533	5.480955107	1.55E-07	2.47E-05	7.088562712
TUBB3	0.765755143	5.229854391	5.476174923	1.59E-07	2.52E-05	7.067088471
SMURF1	0.631931651	10.60533469	5.475829921	1.59E-07	2.52E-05	7.065539096
RP11-809F4.2	0.468152312	4.661068565	5.475634811	1.59E-07	2.52E-05	7.064662902
EHD2	0.877227825	11.93886835	5.471425778	1.62E-07	2.55E-05	7.04576632
COPS7B	0.450461241	10.89768281	5.471084774	1.63E-07	2.55E-05	7.044235806
POTEE	0.500656563	5.299974086	5.471076128	1.63E-07	2.55E-05	7.044197002
MCHR1	1.254468573	8.630488913	5.469632619	1.64E-07	2.56E-05	7.03771889
PLEKHN1	1.153083993	3.102510611	5.469171471	1.64E-07	2.56E-05	7.035649618
TTL	0.488117388	11.5937835	5.468623266	1.64E-07	2.56E-05	7.03318986
NOL3	0.731043047	9.983738149	5.467350392	1.65E-07	2.57E-05	7.027479202
CD47	0.510107234	12.44932216	5.463730353	1.68E-07	2.61E-05	7.011243127
NR2F6	0.589701229	9.81427536	5.460885257	1.71E-07	2.63E-05	6.99848787
NTAN1	0.5423758	9.597213729	5.460628609	1.71E-07	2.63E-05	6.99733748
SERPINH1	0.75829286	12.74854163	5.459054854	1.72E-07	2.63E-05	6.990284129
ANXA2P2	0.876010307	8.528719862	5.458429285	1.73E-07	2.63E-05	6.987480807
YWHAZ	0.468416644	14.53115121	5.457752663	1.73E-07	2.63E-05	6.984448947
TSKU	0.778905202	10.29874518	5.457627681	1.73E-07	2.63E-05	6.983888945
AACS	0.542652554	9.968812276	5.457322334	1.74E-07	2.63E-05	6.98252083
ARMC9	0.539107177	9.532363478	5.456901169	1.74E-07	2.63E-05	6.980633869
SSH3	0.714914707	9.446109691	5.45664271	1.74E-07	2.63E-05	6.979475939
TMEM241	0.53481044	8.390265245	5.45592135	1.75E-07	2.63E-05	6.97624435
BLOC1S4	0.491496302	9.401125477	5.455799456	1.75E-07	2.63E-05	6.975698307
NUDT19	0.541593509	9.351331963	5.449449045	1.80E-07	2.70E-05	6.947262401
ACTG1P12	0.518558394	3.694603013	5.447558069	1.82E-07	2.72E-05	6.938799362
MAN1B1	0.526280582	11.95150565	5.446358681	1.83E-07	2.73E-05	6.933432555
JUN	0.786577288	13.50242232	5.442423001	1.86E-07	2.77E-05	6.915827573
PPP1R15A	0.718031392	11.22663489	5.442353092	1.86E-07	2.77E-05	6.915514935
DHX29	0.528049439	10.36999435	5.441799419	1.87E-07	2.77E-05	6.913038982
AP001471.1	0.792450198	0.757124241	5.441190356	1.87E-07	2.77E-05	6.910315532
HRAS	0.556416188	10.77584848	5.440251626	1.88E-07	2.78E-05	6.906118367
RP11-12M9.4	0.487112092	5.336049242	5.436518715	1.92E-07	2.82E-05	6.889433034
MFSD12	0.603244031	11.19596686	5.43612601	1.92E-07	2.82E-05	6.887678183
BTN2A1	0.512659748	10.41406252	5.43449928	1.94E-07	2.83E-05	6.880409856
RP4-647J21.1	1.040129851	4.151395275	5.431554592	1.96E-07	2.86E-05	6.867256611
LARP1B	0.507118309	9.33227945	5.431261657	1.97E-07	2.86E-05	6.865948406
PHLDB1	0.691462737	12.27914935	5.431020228	1.97E-07	2.86E-05	6.864870256
GAPDHP61	0.53066083	5.414595927	5.429597328	1.98E-07	2.87E-05	6.858516672
RP4-758J18.10	0.79060257	5.393109191	5.42894291	1.99E-07	2.87E-05	6.855594927
RAB11FIP5	0.619924626	10.65196911	5.427282188	2.00E-07	2.89E-05	6.84818147
FKBP11	0.610726652	9.059792276	5.426580943	2.01E-07	2.89E-05	6.845051585
SEC31A	0.50508367	12.51942236	5.426336433	2.01E-07	2.89E-05	6.843960322
ERRFI1	0.908266596	10.84584741	5.42184294	2.06E-07	2.94E-05	6.823911602
LAMA4	0.868306517	11.68586215	5.419462651	2.08E-07	2.97E-05	6.813296041
TOP1MT	0.650989814	9.231429884	5.416392345	2.11E-07	3.00E-05	6.799607887
IGFBP3	1.34453791	13.06405466	5.415410236	2.12E-07	3.01E-05	6.795230541
CAPN2	0.598114592	13.09557405	5.413078788	2.14E-07	3.04E-05	6.784841255
ABCE1	0.466711434	11.61141205	5.411792577	2.16E-07	3.04E-05	6.779111021
PIEZO1	0.847480386	11.33700002	5.411558193	2.16E-07	3.04E-05	6.77806691
WDR1	0.541805591	13.73825828	5.410872596	2.17E-07	3.05E-05	6.775012962
BACE2	0.908508801	10.19798723	5.408296272	2.19E-07	3.08E-05	6.763539274
RPS20P22	0.846838229	3.943418153	5.407469385	2.20E-07	3.08E-05	6.759857522
NAF1	0.483695633	8.540225817	5.407238515	2.20E-07	3.08E-05	6.758829634
SYDE1	0.583688721	10.85518261	5.405826514	2.22E-07	3.09E-05	6.752543715
RNH1	0.527354701	12.55465478	5.405451201	2.22E-07	3.09E-05	6.750873095
TMED7-TICAM2	0.686585234	3.667939821	5.404570942	2.23E-07	3.09E-05	6.746955136
PPP1R18	0.570575838	12.07317868	5.401903231	2.26E-07	3.13E-05	6.735084059
RP11-420L9.5	0.757893699	8.71849379	5.400247172	2.28E-07	3.14E-05	6.727716777
PXDN	0.978637488	11.53783514	5.40014428	2.28E-07	3.14E-05	6.727259093
GPC1	0.968963461	13.85934765	5.399671215	2.28E-07	3.14E-05	6.725154891
ACTG2	1.269975763	7.861000251	5.398679719	2.29E-07	3.14E-05	6.720745112
TAGLN2P1	0.721528416	6.329202567	5.398369399	2.30E-07	3.14E-05	6.719365047
GAPDHP2	0.496286778	4.799114471	5.397391782	2.31E-07	3.14E-05	6.71501771
SNX25	0.576895423	8.872020109	5.397363048	2.31E-07	3.14E-05	6.714889943
MCAM	0.661666518	12.62958408	5.396498059	2.32E-07	3.15E-05	6.711043919
CDK16	0.549054556	12.43525409	5.395344934	2.33E-07	3.15E-05	6.705917405
CEP170B	0.893970184	9.990376314	5.395272291	2.33E-07	3.15E-05	6.705594478
GALE	0.512720323	9.860029192	5.393630643	2.35E-07	3.17E-05	6.698297487
NEK6	0.790519087	12.2105609	5.390842472	2.38E-07	3.20E-05	6.685907804
EIF4G2	0.472214164	15.23473893	5.39046877	2.38E-07	3.20E-05	6.68424754
KIAA0020	0.622938151	9.277096084	5.388933831	2.40E-07	3.22E-05	6.677429008
HIC1	0.886649849	7.973511914	5.38824607	2.41E-07	3.22E-05	6.674374257
NACAD	0.770737349	11.13339716	5.386522676	2.43E-07	3.24E-05	6.666720843
ALKBH5	0.52350519	11.97348372	5.381877529	2.48E-07	3.30E-05	6.646100645
SLAIN2	0.506733334	10.53859237	5.381847751	2.48E-07	3.30E-05	6.645968496
CH17-12M21.1	0.552547313	4.165964866	5.380526248	2.50E-07	3.31E-05	6.640104506
TMEM45A	0.845449347	9.983534746	5.37716774	2.54E-07	3.35E-05	6.625206058
RCN1	0.609553756	12.50017964	5.375762674	2.56E-07	3.35E-05	6.618975047
CNN1	1.137681927	7.104834681	5.375532578	2.56E-07	3.35E-05	6.617954754
MIR221	1.019246835	1.765047602	5.375339074	2.56E-07	3.35E-05	6.617096742
HGSNAT	0.624346956	11.48417373	5.375323388	2.56E-07	3.35E-05	6.617027191
CNTROB	0.6094508	10.45620995	5.370338767	2.62E-07	3.43E-05	6.594932368
MTX2	0.448236553	10.01080953	5.368843404	2.64E-07	3.44E-05	6.588306794
FARP2	0.631728576	10.15993331	5.367579083	2.66E-07	3.46E-05	6.582705904
AHNAK2	1.47068306	8.810409845	5.364246645	2.70E-07	3.50E-05	6.567947717
LRPAP1	0.509006736	12.51994922	5.364081958	2.70E-07	3.50E-05	6.567218542
PITPNM1	0.685783768	10.57179079	5.363171321	2.71E-07	3.50E-05	6.563186846
POU3F1	1.11243431	5.660611562	5.362331328	2.72E-07	3.51E-05	6.559468337
SBNO2	0.847345792	10.91550833	5.361599427	2.73E-07	3.52E-05	6.556228658
SH3RF1	0.610480789	10.22761245	5.360245001	2.75E-07	3.53E-05	6.550234252
ITPR3	1.054663302	8.623198498	5.35854427	2.77E-07	3.55E-05	6.542708664
CHST12	0.532829572	10.43596836	5.354887465	2.82E-07	3.60E-05	6.526533225
RARA-AS1	0.604990389	6.770603079	5.35159207	2.87E-07	3.65E-05	6.511963004
EXT2	0.576270485	12.02603284	5.348625022	2.91E-07	3.70E-05	6.498849864
NAB2	0.656059931	10.94292897	5.347815579	2.92E-07	3.70E-05	6.495273331
CYR61	1.15153602	11.79564596	5.347091886	2.93E-07	3.71E-05	6.492076007
HARS2	0.52086284	10.26559393	5.345935989	2.94E-07	3.71E-05	6.486969799
TRIB1	0.621039949	10.32717885	5.345732496	2.95E-07	3.71E-05	6.486070943
TASP1	0.536718114	8.393968876	5.342939954	2.98E-07	3.76E-05	6.473738295
CHID1	0.516098412	11.98331983	5.34130336	3.01E-07	3.77E-05	6.466512724
PCNXL2	0.640273887	10.03070329	5.341196458	3.01E-07	3.77E-05	6.466040805
Sep-09	0.643465712	14.14892739	5.34059002	3.02E-07	3.77E-05	6.463363803
FTSJ1	0.437999192	10.73596891	5.338936531	3.04E-07	3.79E-05	6.456065878
GAPDHP70	0.588755886	5.189248852	5.333780588	3.12E-07	3.85E-05	6.433319437
RGS17	0.916702588	8.690887757	5.333395671	3.12E-07	3.85E-05	6.431621915
AC093627.7	0.997508932	1.31788827	5.333352675	3.12E-07	3.85E-05	6.431432305
SLC2A3	0.97385536	11.28590469	5.333017927	3.13E-07	3.85E-05	6.429956113
FAM43A	0.813680805	8.549237366	5.332816234	3.13E-07	3.85E-05	6.429066701
PTP4A2P1	0.500758997	4.373738701	5.332647899	3.13E-07	3.85E-05	6.42832441
UAP1	0.558367749	10.67778444	5.332569297	3.13E-07	3.85E-05	6.427977812
AL450992.2	1.199933892	4.4593993	5.331811274	3.14E-07	3.86E-05	6.424635467
EIF4A1P10	0.479563489	7.682340926	5.330607088	3.16E-07	3.87E-05	6.419326534
ZNF335	0.600057073	10.02583953	5.330379571	3.17E-07	3.87E-05	6.418323569
IQSEC1	0.642623394	11.48280572	5.329513572	3.18E-07	3.88E-05	6.414506244
FN1	0.917146742	15.68083819	5.325633714	3.24E-07	3.94E-05	6.397409122
HYOU1	0.563260628	12.75569488	5.325119104	3.25E-07	3.94E-05	6.395142076
ALG2	0.489025787	10.39829224	5.323507334	3.27E-07	3.96E-05	6.388042621
AGAP1	0.749555647	11.55355772	5.321015045	3.31E-07	4.00E-05	6.377067645
AC004980.7	0.52022506	7.917049833	5.318808902	3.34E-07	4.03E-05	6.367355722
SSR1	0.443456357	12.8863045	5.318204976	3.35E-07	4.04E-05	6.3646976
UBE2Z	0.47237252	12.10641033	5.315343104	3.40E-07	4.07E-05	6.352104203
UGDH	0.564748082	10.27563631	5.315330086	3.40E-07	4.07E-05	6.352046925
PRKCSH	0.537630639	13.53371123	5.313763448	3.42E-07	4.09E-05	6.345155099
FAM86C1	0.505459349	7.942068211	5.313568656	3.43E-07	4.09E-05	6.344298285
LINC00622	0.849662783	4.084194758	5.31224645	3.45E-07	4.09E-05	6.338482996
RP3-412A9.16	0.703671774	5.240658926	5.310813022	3.47E-07	4.09E-05	6.332179674
MTDH	0.493066636	12.23034098	5.31036269	3.48E-07	4.09E-05	6.330199638
ANXA2	0.917222631	13.97849152	5.31035443	3.48E-07	4.09E-05	6.330163323
RP11-730B22.1	0.76117419	1.860071795	5.310327385	3.48E-07	4.09E-05	6.330044412
AC005592.2	0.913319729	4.613134392	5.310164161	3.48E-07	4.09E-05	6.329326777
GXYLT2	0.897131891	7.496015494	5.309939596	3.48E-07	4.09E-05	6.328339472
MIR222HG	1.212549223	5.851695183	5.30992814	3.49E-07	4.09E-05	6.328289106
SLC39A7	0.544874086	12.43906244	5.306802396	3.54E-07	4.15E-05	6.314549757
ZFYVE28	0.656616611	8.888108718	5.306321366	3.54E-07	4.15E-05	6.312435869
COLGALT1	0.631309994	12.21677891	5.305812463	3.55E-07	4.15E-05	6.310199637
TEAD4	0.864207146	8.327257497	5.304682557	3.57E-07	4.15E-05	6.305235124
SLC36A1	0.726650357	9.468546446	5.304663481	3.57E-07	4.15E-05	6.305151313
ZNF395	0.717015151	11.16966629	5.304434283	3.58E-07	4.15E-05	6.304144371
ZNF783	0.713200094	9.795163236	5.303457476	3.59E-07	4.16E-05	6.299853266
NRBP1	0.462249898	12.2772885	5.299903915	3.65E-07	4.22E-05	6.284247174
FEM1C	0.683874986	11.47805145	5.298365495	3.68E-07	4.24E-05	6.277493199
PFKP	0.71422515	11.98927894	5.298281667	3.68E-07	4.24E-05	6.277125217
ACTA2-AS1	0.925380653	4.967574905	5.293051091	3.77E-07	4.33E-05	6.254172446
RASSF1	0.482013102	10.34007852	5.291464542	3.80E-07	4.36E-05	6.247213503
TIMP2	0.609951814	14.6038512	5.290753249	3.81E-07	4.36E-05	6.244094092
STK35	0.62764128	10.47458891	5.289957542	3.83E-07	4.37E-05	6.240604833
EIF4H	0.591199046	13.68742188	5.289114539	3.84E-07	4.38E-05	6.236908571
CLPTM1L	0.478608764	11.93819326	5.288621664	3.85E-07	4.38E-05	6.234747684
LINC01219	0.650468963	0.632481391	5.287412717	3.87E-07	4.40E-05	6.229447959
S1PR2	0.735867395	8.875924005	5.284369794	3.93E-07	4.45E-05	6.216112294
AC144831.1	0.984915095	5.460591814	5.28396563	3.94E-07	4.45E-05	6.214341445
SPRY1	0.918030156	10.75766452	5.283469148	3.94E-07	4.45E-05	6.212166231
RP1-52D1.1	0.559140053	3.128071612	5.282948964	3.95E-07	4.46E-05	6.209887323
DNAJB11	0.495461516	11.38016112	5.281306456	3.98E-07	4.48E-05	6.202692597
EDARADD	0.712487551	5.297459971	5.27940833	4.02E-07	4.51E-05	6.194380132
TAGLN2	0.82120418	14.16353596	5.272322909	4.16E-07	4.66E-05	6.163369459
PPP1R3B	0.768034638	9.896465735	5.270399607	4.19E-07	4.68E-05	6.154956812
ICMT	0.546980952	11.60338741	5.270297821	4.19E-07	4.68E-05	6.154511655
SERTAD2	0.694763002	10.19212911	5.269903142	4.20E-07	4.68E-05	6.15278559
RP11-253E3.3	1.053498592	6.282332244	5.266998347	4.26E-07	4.73E-05	6.14008476
MYO9B	0.695919496	12.60729554	5.266969201	4.26E-07	4.73E-05	6.139957348
RP3-347M6.1	0.662063753	1.500136187	5.265374126	4.29E-07	4.75E-05	6.132985209
EIF4A1	0.550126162	8.903664418	5.264747534	4.30E-07	4.75E-05	6.13024676
GPR157	0.899125799	6.754212638	5.264371838	4.31E-07	4.75E-05	6.12860493
OSMR	1.028919454	11.37981697	5.264230369	4.31E-07	4.75E-05	6.127986719
APLP2	0.576992994	14.72174997	5.263957461	4.32E-07	4.75E-05	6.126794157
TATDN2	0.523201138	10.52423573	5.263487593	4.33E-07	4.75E-05	6.124741016
BICD2	0.639126145	10.75313625	5.260804042	4.38E-07	4.79E-05	6.113017415
COL4A2	0.924881401	13.98279471	5.260096217	4.40E-07	4.79E-05	6.109925845
KLHL29	0.905892333	8.639862951	5.260090632	4.40E-07	4.79E-05	6.109901452
GCKR	0.886706413	5.362431661	5.259732338	4.41E-07	4.79E-05	6.108336643
CCDC149	0.55402813	9.661735655	5.259595771	4.41E-07	4.79E-05	6.107740225
CTD-2553C6.1	1.007556159	2.477271116	5.258205035	4.44E-07	4.82E-05	6.101667165
BMP8B	1.206333751	8.44266379	5.257791274	4.45E-07	4.82E-05	6.099860573
CTC-251D13.1	0.822046842	3.868009275	5.253944593	4.53E-07	4.89E-05	6.083069717
PP14571	1.060129632	4.487880654	5.253376761	4.54E-07	4.90E-05	6.080591849
AC108448.2	0.931227241	3.19338468	5.252905386	4.55E-07	4.90E-05	6.078535039
LINC00997	0.708755591	7.718808161	5.250585015	4.60E-07	4.94E-05	6.068412156
AC093627.12	0.88067048	1.591532997	5.25033296	4.60E-07	4.94E-05	6.067312725
IFNAR1	0.486530803	11.97197519	5.247766689	4.66E-07	4.99E-05	6.056121123
RP11-326C3.2	0.8568744	3.030926522	5.247384613	4.67E-07	4.99E-05	6.054455208
C20orf195	1.143736447	4.564060861	5.245975976	4.70E-07	5.00E-05	6.048314042
AP000695.6	0.816337377	3.5419412	5.245815879	4.70E-07	5.00E-05	6.04761615
BEGAIN	1.030092033	8.123025894	5.245629083	4.71E-07	5.00E-05	6.046801887
PPME1	0.524410928	11.64634458	5.242310222	4.78E-07	5.06E-05	6.032338085
DOK4	0.754241245	8.983182835	5.242220431	4.78E-07	5.06E-05	6.03194686
FOSL2	0.888165975	11.74611706	5.24194981	4.79E-07	5.06E-05	6.030767773
RNF145	0.528739623	12.16879053	5.241230992	4.80E-07	5.06E-05	6.027636121
LMAN2	0.489621688	12.54793839	5.240830157	4.81E-07	5.06E-05	6.02588995
PDLIM1	0.829451604	10.31089492	5.24078186	4.81E-07	5.06E-05	6.025679559
HMGXB3	0.538466299	11.37269835	5.239176675	4.85E-07	5.09E-05	6.018687813
TPI1	0.568693925	14.90291973	5.237479778	4.89E-07	5.12E-05	6.011298243
SLC25A43	0.744873609	9.159125768	5.236874533	4.90E-07	5.13E-05	6.008662954
PODXL	0.75326434	12.4697986	5.236014466	4.92E-07	5.14E-05	6.004918523
AKAP12	1.06097728	12.25572814	5.235495537	4.93E-07	5.14E-05	6.002659495
ARAP3	0.87398903	10.85417322	5.235375845	4.93E-07	5.14E-05	6.002138468
SDF4	0.484907245	12.83705329	5.234925015	4.95E-07	5.14E-05	6.000176055
LDHAP4	0.725137504	7.800529678	5.234022852	4.97E-07	5.15E-05	5.996249395
SMS	0.588207944	12.11301313	5.232948966	4.99E-07	5.17E-05	5.991575936
CCDC86	0.49162181	10.16499826	5.230141183	5.06E-07	5.22E-05	5.9793599
LTBP3	0.738236643	13.45261046	5.229875729	5.06E-07	5.22E-05	5.978205206
TNFRSF10D	0.84475674	7.908305643	5.227192723	5.13E-07	5.27E-05	5.966536794
ZBTB11-AS1	0.479749207	6.664581484	5.22708236	5.13E-07	5.27E-05	5.966056912
MICALL1	0.664611184	10.27690131	5.226146874	5.15E-07	5.29E-05	5.961989534
MTL5	0.974560074	4.068957275	5.224837238	5.18E-07	5.31E-05	5.956296257
ACTBP1	0.452558523	4.700801674	5.223884314	5.21E-07	5.31E-05	5.952154318
P4HA2	0.882325119	9.786294011	5.223851078	5.21E-07	5.31E-05	5.952009868
MYO1C	0.653193948	11.05510999	5.223609692	5.21E-07	5.31E-05	5.950960759
RAB40A	0.638805389	5.444033745	5.22287595	5.23E-07	5.32E-05	5.947771993
RP11-380L11.4	0.752642513	5.770142781	5.222392124	5.24E-07	5.32E-05	5.945669509
FBXO17	0.969017573	9.965708538	5.221484541	5.26E-07	5.34E-05	5.941725942
MOGS	0.506403816	11.11387152	5.220029297	5.30E-07	5.36E-05	5.935403725
CRELD1	0.48461557	10.79509232	5.218266199	5.34E-07	5.40E-05	5.927745732
GALNT12	0.740814449	6.480818646	5.217479461	5.36E-07	5.40E-05	5.924329135
CSRNP2	0.505912702	11.08005928	5.216871192	5.38E-07	5.40E-05	5.921687833
SLC35B3	0.474855935	9.440551157	5.216827199	5.38E-07	5.40E-05	5.921496809
RP11-662I13.3	1.170199403	3.254083488	5.215722802	5.41E-07	5.42E-05	5.916701739
PPP2R4	0.561059669	12.96980969	5.21552861	5.41E-07	5.42E-05	5.915858672
NSUN5	0.558912025	10.10777781	5.215097223	5.42E-07	5.42E-05	5.913985921
GPR3	0.812748102	7.932103682	5.214226728	5.44E-07	5.43E-05	5.910207235
GAPDHP64	0.62825576	3.982056213	5.208584481	5.59E-07	5.56E-05	5.885725933
NPLOC4	0.496357989	12.19830867	5.207973664	5.60E-07	5.56E-05	5.883076768
SLC9A1	0.633349279	10.61614229	5.207879883	5.61E-07	5.56E-05	5.882670049
ACTBP8	0.448576301	5.039086158	5.207659564	5.61E-07	5.56E-05	5.881714575
SLC22A18	0.883663227	8.844636014	5.204461383	5.70E-07	5.64E-05	5.867847976
RP11-373D23.3	1.058675752	4.424868097	5.203800756	5.71E-07	5.64E-05	5.864984399
FAM65A	0.555435722	11.61820128	5.202840474	5.74E-07	5.66E-05	5.860822384
AGBL5	0.480200913	10.62884614	5.200576067	5.80E-07	5.70E-05	5.85101024
SPRY4	1.04549011	11.62216791	5.200474742	5.80E-07	5.70E-05	5.850571248
DPP3	0.512845174	10.73317058	5.200253659	5.81E-07	5.70E-05	5.849613426
ARF1	0.410513857	14.10323449	5.199657809	5.82E-07	5.70E-05	5.847032103
BGN	0.78070544	13.56694738	5.198048576	5.87E-07	5.74E-05	5.840061675
AC093673.5	0.76309331	9.500328138	5.19708753	5.89E-07	5.75E-05	5.835899616
PTPLA	0.96447025	6.361872466	5.195577919	5.93E-07	5.78E-05	5.829362952
NAA15	0.472630787	10.85577618	5.1948383	5.95E-07	5.79E-05	5.826160873
TMCO6	0.577289272	8.545955507	5.19405064	5.98E-07	5.81E-05	5.822751161
AC006547.14	0.946330133	5.645876029	5.19137219	6.05E-07	5.87E-05	5.811159123
UBE2Q1	0.463622997	11.64399266	5.191127377	6.06E-07	5.87E-05	5.810099813
TMEM44	0.606843933	8.838360206	5.190011285	6.09E-07	5.89E-05	5.805270905
MLEC	0.613882779	13.02362749	5.189320916	6.11E-07	5.89E-05	5.80228431
IL27RA	0.743382157	8.303577083	5.188585157	6.13E-07	5.90E-05	5.799101659
PLAU	1.088198566	10.58875775	5.188479832	6.13E-07	5.90E-05	5.798646087
RP11-274H2.3	0.9113154	2.507572189	5.18775389	6.15E-07	5.91E-05	5.795506266
SIL1	0.530301675	10.8111373	5.18573025	6.21E-07	5.95E-05	5.786755326
TTYH3	0.792433085	13.79716633	5.18397841	6.26E-07	5.99E-05	5.779181704
CTNNA1	0.544950756	13.9993808	5.182954738	6.29E-07	6.01E-05	5.774756969
RAB15	0.737129828	10.05281826	5.1827001	6.30E-07	6.01E-05	5.773656414
RNF24	0.607228713	11.396824	5.181964583	6.32E-07	6.01E-05	5.770477696
SETD8	0.526067091	10.3152095	5.181805615	6.32E-07	6.01E-05	5.769790722
PDIA3	0.532316901	13.65802856	5.181715646	6.33E-07	6.01E-05	5.769401928
UGGT1	0.524576634	11.43639984	5.181267313	6.34E-07	6.01E-05	5.767464573
ING2	0.532941743	8.868666424	5.177044463	6.46E-07	6.12E-05	5.749222453
CHST3	0.76662638	10.98332996	5.176617977	6.48E-07	6.12E-05	5.747380682
SLC35B2	0.508921156	11.90083145	5.175429782	6.51E-07	6.13E-05	5.742250053
TMX3	0.533314652	11.26312502	5.175210819	6.52E-07	6.13E-05	5.741304663
EDEM1	0.604093483	10.19653633	5.175151425	6.52E-07	6.13E-05	5.741048228
SDC1	1.048750764	9.603603926	5.174896911	6.53E-07	6.13E-05	5.739949389
DNAJC3	0.564458959	11.23225197	5.172662832	6.60E-07	6.17E-05	5.730305606
CARS	0.559742998	11.60444731	5.172652886	6.60E-07	6.17E-05	5.730262681
PTPDC1	0.714567216	8.61783193	5.17249428	6.60E-07	6.17E-05	5.729578143
DDX41	0.473292377	11.93967774	5.171989219	6.62E-07	6.17E-05	5.727398423
ATP2A2	0.575065328	13.75030558	5.171807313	6.62E-07	6.17E-05	5.726613398
RP13-977J11.2	0.864249755	5.291319199	5.170756018	6.65E-07	6.18E-05	5.722076866
TMEM189	0.444083287	10.69153347	5.170709333	6.66E-07	6.18E-05	5.721875424
CAV1	1.120251452	11.72412935	5.16982269	6.68E-07	6.19E-05	5.718049933
RPN2	0.489994987	13.82293952	5.167998544	6.74E-07	6.22E-05	5.710180974
CSNK1D	0.49952162	12.90926672	5.167784961	6.75E-07	6.22E-05	5.709259752
TNFRSF10B	0.707920243	10.88706691	5.16777516	6.75E-07	6.22E-05	5.70921748
ACTA2	0.917722007	11.43530933	5.166164893	6.80E-07	6.26E-05	5.702273005
FAM57A	0.566019523	10.53501924	5.165328709	6.82E-07	6.27E-05	5.698667464
RP13-349O20.2	0.72980139	4.200779429	5.164981033	6.83E-07	6.27E-05	5.697168442
LPPR2	0.564316846	12.07135098	5.164138639	6.86E-07	6.29E-05	5.693536722
GARS	0.54983839	12.4071759	5.161913512	6.93E-07	6.34E-05	5.683945806
PPIB	0.497523095	13.02709821	5.159188529	7.02E-07	6.41E-05	5.672204383
RIN1	0.983127472	9.286072334	5.159092364	7.02E-07	6.41E-05	5.67179011
RP11-76E16.2	0.764722265	1.628398056	5.158320975	7.05E-07	6.42E-05	5.668467192
FAM3C	0.609256547	11.78222637	5.155621215	7.13E-07	6.49E-05	5.656840204
TXNRD3	0.551059743	8.26062515	5.155250228	7.15E-07	6.49E-05	5.655242822
AC078883.3	0.804757136	3.900924886	5.154793239	7.16E-07	6.49E-05	5.653275252
RP11-815J21.4	0.828132949	1.559714087	5.154474493	7.17E-07	6.49E-05	5.651902961
POFUT2	0.539019059	10.90599465	5.153905591	7.19E-07	6.49E-05	5.649453827
BLVRA	0.531282589	11.01884662	5.153739536	7.20E-07	6.49E-05	5.648738993
MFGE8	0.599610237	12.26594799	5.152983136	7.22E-07	6.51E-05	5.645483053
ENTPD4	0.598224106	10.32258753	5.14813362	7.38E-07	6.64E-05	5.624616304
ERN1	0.631614108	8.8535554	5.146212982	7.45E-07	6.68E-05	5.616355964
STX4	0.50177956	10.74502304	5.146009645	7.46E-07	6.68E-05	5.615481573
SEC24A	0.492435533	10.45816646	5.145830686	7.46E-07	6.68E-05	5.614712032
LRRC15	1.65680558	4.885991992	5.145609999	7.47E-07	6.68E-05	5.613763087
HBEGF	0.830677829	10.04092315	5.145016607	7.49E-07	6.68E-05	5.611211668
DUSP3	0.529475828	11.68934173	5.144868857	7.50E-07	6.68E-05	5.610576415
TFG	0.439973777	12.18825801	5.144015	7.52E-07	6.70E-05	5.606905512
PLEKHG5	0.736612278	9.122214827	5.141920827	7.60E-07	6.75E-05	5.597904081
PRRC1	0.482577854	10.92940906	5.141329883	7.62E-07	6.75E-05	5.595364487
CRAT	0.588851816	11.77508475	5.141061822	7.63E-07	6.75E-05	5.59421256
PCDHGC5	0.998856845	8.925233498	5.140433113	7.65E-07	6.75E-05	5.591511
GOLGA2	0.68745399	11.17473877	5.14028207	7.65E-07	6.75E-05	5.590862005
FBXO48	0.513936064	6.899835393	5.139954662	7.67E-07	6.75E-05	5.589455254
TNFRSF12A	0.958919227	11.42774664	5.139589823	7.68E-07	6.75E-05	5.587887758
WBSCR16	0.520712786	11.51927065	5.139500885	7.68E-07	6.75E-05	5.587505655
ABL1	0.662831561	12.32775531	5.139189985	7.69E-07	6.75E-05	5.586169981
COL4A1	0.910074768	14.01150866	5.137888038	7.74E-07	6.79E-05	5.580577237
IPPK	0.585569337	7.613706222	5.135634891	7.82E-07	6.84E-05	5.570900842
TIMM22	0.462726664	10.24965095	5.135490771	7.82E-07	6.84E-05	5.570282007
STX2	0.506793192	10.36649031	5.134700918	7.85E-07	6.85E-05	5.566890681
KLF10	0.60347272	10.97467598	5.134504192	7.86E-07	6.85E-05	5.566046069
RCE1	0.481193511	9.236874311	5.133153545	7.91E-07	6.88E-05	5.560247932
SRP68	0.443712912	11.90368186	5.132571193	7.93E-07	6.89E-05	5.557748314
MANBA	0.513557797	10.38226262	5.130576359	8.00E-07	6.94E-05	5.549187466
LEMD2	0.537846052	11.04900757	5.129705086	8.04E-07	6.95E-05	5.545449136
KDM2A	0.604545333	11.49968295	5.129389937	8.05E-07	6.95E-05	5.544097055
AC092066.1	0.65246586	7.108486912	5.129245794	8.05E-07	6.95E-05	5.543478656
CES2	0.541376848	10.96994195	5.129095101	8.06E-07	6.95E-05	5.542832175
FAM101B	0.647833166	10.11156397	5.128847181	8.07E-07	6.95E-05	5.541768607
HPDL	0.77954699	4.987375322	5.128019922	8.10E-07	6.96E-05	5.538219973
COL7A1	1.128058948	8.80743549	5.127357267	8.12E-07	6.97E-05	5.535377725
MXRA5Y	1.673202715	3.434891179	5.1264911	8.15E-07	6.99E-05	5.531662973
ANKRD52	0.701755894	11.48466225	5.1221362	8.32E-07	7.12E-05	5.512992811
ICAM1	1.06368637	10.24435882	5.121498837	8.34E-07	7.13E-05	5.510261286
MRGBP	0.525010192	9.914217441	5.12135271	8.35E-07	7.13E-05	5.509635071
SMTN	0.688180113	10.17200491	5.119418335	8.42E-07	7.18E-05	5.501346647
POLH	0.57462427	9.215923425	5.118942973	8.44E-07	7.18E-05	5.499310158
SLCO4A1	0.852834606	8.093510757	5.118334618	8.46E-07	7.19E-05	5.496704112
ATP13A3	0.638811771	11.33907169	5.116674462	8.53E-07	7.23E-05	5.489593533
PCSK7	0.592449002	10.00801946	5.116292225	8.54E-07	7.23E-05	5.487956619
PYY	0.736422825	2.244351701	5.116127815	8.55E-07	7.23E-05	5.487252565
SH3BP2	0.576148734	12.02439066	5.116010668	8.56E-07	7.23E-05	5.486750916
RAB3D	0.645789833	9.107024006	5.11541833	8.58E-07	7.24E-05	5.484214523
FKBP10	0.629745319	13.08736972	5.109548016	8.81E-07	7.42E-05	5.459089207
ITPRIPL2	0.683383854	9.949872016	5.10582872	8.96E-07	7.53E-05	5.443181104
LDHAP2	0.669793929	3.987196623	5.10547412	8.98E-07	7.53E-05	5.441664849
KRT8P12	0.575816174	8.412164381	5.105102126	8.99E-07	7.53E-05	5.4400743
LRRC32	0.789440738	9.752522243	5.105049243	8.99E-07	7.53E-05	5.439848194
PTK7	0.641598603	11.29888572	5.104586059	9.01E-07	7.53E-05	5.43786787
HGH1	0.521826642	10.07677522	5.104434911	9.02E-07	7.53E-05	5.437221671
MPP3	0.703192711	7.297006337	5.103119618	9.07E-07	7.57E-05	5.431599017
PRTN3	1.381444492	3.43758333	5.100439162	9.19E-07	7.65E-05	5.42014375
USP35	0.52367894	9.000458537	5.100134005	9.20E-07	7.65E-05	5.418839895
OAF	0.727291858	9.949398069	5.099464702	9.23E-07	7.66E-05	5.415980341
PVRL2	0.619658423	11.4773753	5.098999589	9.25E-07	7.66E-05	5.413993338
DPP7	0.584901486	12.40716717	5.098606448	9.26E-07	7.66E-05	5.412313904
RRBP1	0.723933322	12.25727961	5.098525018	9.27E-07	7.66E-05	5.411966059
CDK2AP2	0.456671386	11.09291308	5.098324344	9.28E-07	7.66E-05	5.411108857
PREP	0.483253411	10.43898149	5.096966774	9.33E-07	7.67E-05	5.405310491
ETS1	0.674557058	11.37698419	5.096906166	9.34E-07	7.67E-05	5.405051649
MAD1L1	0.559168641	10.38185557	5.096852883	9.34E-07	7.67E-05	5.404824096
PDK1	0.716582584	9.986202872	5.096699932	9.34E-07	7.67E-05	5.404170898
ECM1	0.777294619	9.741456556	5.09474205	9.43E-07	7.73E-05	5.395810785
SNED1	0.909829225	8.924151951	5.094376675	9.44E-07	7.73E-05	5.394250898
IFFO2	0.681471796	10.00318089	5.093665037	9.47E-07	7.75E-05	5.391212948
CTHRC1	1.231174412	8.558695807	5.093423553	9.48E-07	7.75E-05	5.390182135
EPS8L1	0.658255047	5.688374752	5.092937502	9.51E-07	7.75E-05	5.388107453
RP11-312J18.5	0.577043707	6.131520438	5.092203327	9.54E-07	7.77E-05	5.384973935
ACP2	0.504242457	11.53401965	5.091689347	9.56E-07	7.77E-05	5.382780419
PRDM4	0.549919267	10.37829636	5.089963368	9.64E-07	7.82E-05	5.375415621
PTP4A1	0.515374502	12.51768924	5.089857647	9.64E-07	7.82E-05	5.374964563
RP11-396C23.2	0.801456313	4.479858649	5.088758782	9.69E-07	7.85E-05	5.370276683
SLC35B1	0.415573299	11.49384046	5.08714339	9.76E-07	7.89E-05	5.363386563
DOCK6	0.742269363	10.51019334	5.086959797	9.77E-07	7.89E-05	5.362603582
GSS	0.499117054	11.17762115	5.086653277	9.78E-07	7.89E-05	5.361296397
VPS37C	0.456996673	10.04706912	5.085845184	9.82E-07	7.91E-05	5.357850473
SNX9	0.558452981	10.79928406	5.085025583	9.86E-07	7.93E-05	5.354355881
LINC01301	0.698765854	6.59267992	5.083389642	9.93E-07	7.97E-05	5.347381811
ANPEP	1.050789918	8.697815629	5.083051781	9.94E-07	7.98E-05	5.345941699
NOTCH3	0.817648374	12.33853793	5.082742448	9.96E-07	7.98E-05	5.344623248
XYLT1	0.948532524	9.950959466	5.081718056	1.00E-06	7.99E-05	5.340257453
TRIB2	0.836304729	12.77159305	5.081707431	1.00E-06	7.99E-05	5.340212176
PRR7	0.756411243	8.696197529	5.080512972	1.01E-06	8.02E-05	5.335122389
SHCBP1	0.723878342	9.018111609	5.080222997	1.01E-06	8.02E-05	5.33388689
ZNRF2P1	0.792438785	4.385238713	5.07970157	1.01E-06	8.03E-05	5.331665368
AC005517.3	0.753315803	3.230361418	5.076725659	1.02E-06	8.12E-05	5.318989738
PTPRJ	0.618583533	10.98484436	5.07668312	1.02E-06	8.12E-05	5.318808583
ARSD	0.72085745	10.5615369	5.076122929	1.03E-06	8.13E-05	5.316423112
ANXA2P3	0.795062578	3.21687902	5.075668513	1.03E-06	8.14E-05	5.314488206
RALA	0.481257939	11.95810286	5.074909001	1.03E-06	8.15E-05	5.311254474
ACLY	0.544208431	13.11525407	5.072702841	1.04E-06	8.22E-05	5.301863412
BACE1	0.572412579	12.15266739	5.071829862	1.05E-06	8.24E-05	5.298148179
CHRNB4	1.245553445	3.17864293	5.071727708	1.05E-06	8.24E-05	5.29771346
KDELC2	0.68041423	10.84878709	5.068980246	1.06E-06	8.33E-05	5.286023954
TBX15	0.945428502	8.612959628	5.068064432	1.06E-06	8.35E-05	5.282128493
FBXW2	0.555819038	11.42199487	5.067177361	1.07E-06	8.38E-05	5.278355779
AMMECR1	0.597566863	8.280179259	5.06645266	1.07E-06	8.39E-05	5.275273979
PHRF1	0.683040638	10.7960598	5.066379132	1.07E-06	8.39E-05	5.274961321
ETV3	0.588532335	9.988666888	5.063712139	1.09E-06	8.48E-05	5.263622756
IL11	1.26468562	5.533812985	5.06150301	1.10E-06	8.54E-05	5.254234043
RP11-46D6.1	0.61565188	5.620181193	5.061312422	1.10E-06	8.54E-05	5.25342419
KPNA2	0.506931378	12.37945834	5.060990459	1.10E-06	8.54E-05	5.252056144
CSNK1G1	0.556509523	9.47400589	5.060560982	1.10E-06	8.54E-05	5.250231359
PDE4C	1.137479464	6.103256185	5.060540599	1.10E-06	8.54E-05	5.250144757
CNIH3	0.925296973	10.24158761	5.059308713	1.11E-06	8.58E-05	5.244911292
EIF4A1P4	0.434738023	5.233093916	5.058703089	1.11E-06	8.59E-05	5.242338734
SHROOM2	0.955941993	10.05566323	5.058183893	1.11E-06	8.60E-05	5.240133481
GHDC	0.492300372	10.61178162	5.056752792	1.12E-06	8.64E-05	5.234055818
CMIP	0.639067863	11.31815136	5.055421521	1.13E-06	8.68E-05	5.228403231
ANXA2P1	0.595817434	4.379707887	5.054522351	1.13E-06	8.71E-05	5.22458596
XYLT2	0.518266299	10.23273226	5.054223451	1.13E-06	8.71E-05	5.223317139
EMP2	0.931730925	10.10554528	5.052921387	1.14E-06	8.75E-05	5.217790553
MYBPC2	1.054767828	3.797128017	5.050931637	1.15E-06	8.81E-05	5.209347091
SLC27A4	0.526215371	10.84434938	5.050852348	1.15E-06	8.81E-05	5.209010681
AGPAT6	0.594603329	11.60499532	5.050591158	1.15E-06	8.81E-05	5.207902518
COL27A1	1.016561524	9.089589441	5.049855927	1.16E-06	8.82E-05	5.204783337
STAT3	0.535379921	13.30245173	5.049576636	1.16E-06	8.82E-05	5.203598547
RP4-591C20.9	0.639317661	6.973377389	5.049498641	1.16E-06	8.82E-05	5.20326769
LINC01503	0.915899565	8.186607752	5.04840365	1.16E-06	8.84E-05	5.1986231
RP11-672A2.4	0.891054355	2.5013691	5.048253954	1.16E-06	8.84E-05	5.197988196
FKTN	0.56440572	10.19520126	5.047406794	1.17E-06	8.87E-05	5.194395396
CCNYL1	0.444013494	10.00254933	5.046946759	1.17E-06	8.87E-05	5.192444576
RASA2	0.527491961	9.153639311	5.045777455	1.18E-06	8.90E-05	5.187486612
RP11-680G24.4	0.488461754	5.21362251	5.045587651	1.18E-06	8.90E-05	5.186681904
RCN3	0.786157335	9.442343469	5.043726354	1.19E-06	8.96E-05	5.178791751
PROB1	0.758363251	8.096022652	5.043550977	1.19E-06	8.96E-05	5.178048429
SMARCAL1	0.436785853	10.07697836	5.042827139	1.19E-06	8.97E-05	5.174980682
DUSP6	0.763151264	11.67954998	5.042805477	1.19E-06	8.97E-05	5.174888879
MED15	0.578549233	11.62734808	5.041970899	1.20E-06	8.99E-05	5.171352208
DUS1L	0.498690747	10.85303887	5.040795775	1.20E-06	9.03E-05	5.166373127
ISYNA1	0.644393456	10.46471621	5.039760233	1.21E-06	9.06E-05	5.161986162
RP5-1198O20.5	0.725484625	1.200353918	5.039608098	1.21E-06	9.06E-05	5.16134171
COX10	0.414835381	8.879829499	5.037088822	1.23E-06	9.15E-05	5.150672022
CUX1	0.548028945	12.42655435	5.03639843	1.23E-06	9.16E-05	5.147748736
EGLN2	0.508269961	9.639271961	5.03603296	1.23E-06	9.17E-05	5.146201364
AC027612.1	0.731663175	3.143843174	5.034659744	1.24E-06	9.21E-05	5.140388003
MIER2	0.579748157	9.897462854	5.034324533	1.24E-06	9.22E-05	5.138969099
TBC1D25	0.476165425	9.955601895	5.032400251	1.25E-06	9.28E-05	5.130825187
SPIDR	0.454178735	11.129402	5.031925466	1.25E-06	9.29E-05	5.12881616
ACAN	1.447406748	7.334892413	5.030204483	1.26E-06	9.35E-05	5.121535057
ASB6	0.52231216	10.7420024	5.029336718	1.27E-06	9.38E-05	5.117864419
CELF1	0.596064951	12.00547658	5.028724816	1.27E-06	9.39E-05	5.115276357
TWISTNB	0.507619543	10.15370898	5.027442683	1.28E-06	9.43E-05	5.109854264
CTDNEP1	0.405701115	12.46903665	5.027318309	1.28E-06	9.43E-05	5.109328346
CDR2	0.555127772	9.691892883	5.02693299	1.28E-06	9.43E-05	5.10769907
IFNAR2	0.442639887	9.929983136	5.0256976	1.29E-06	9.47E-05	5.102475987
MBD2	0.479476833	10.93713496	5.025553929	1.29E-06	9.47E-05	5.101868623
SCO1	0.441138079	10.46644477	5.02413368	1.30E-06	9.51E-05	5.095865255
SNX1	0.429702742	12.27308728	5.023955729	1.30E-06	9.51E-05	5.095113143
USP40	0.538280445	10.68726457	5.022181751	1.31E-06	9.57E-05	5.087616491
SPATA2L	0.602963105	9.157772006	5.022121796	1.31E-06	9.57E-05	5.087363161
ROCK2	0.59080369	11.03863067	5.021658025	1.31E-06	9.58E-05	5.085403644
VKORC1	0.517608743	10.4936376	5.021075003	1.32E-06	9.59E-05	5.082940458
ACBD3	0.490846302	10.95158007	5.020622646	1.32E-06	9.60E-05	5.081029457
ANKLE2	0.489585698	11.3914806	5.019020087	1.33E-06	9.66E-05	5.07426038
RP11-385F5.4	0.695933423	2.971123722	5.018233225	1.33E-06	9.68E-05	5.070937317
RP11-930P14.2	0.870486606	4.234805057	5.017700255	1.34E-06	9.68E-05	5.068686701
ENTPD7	0.59449333	7.44323099	5.017617483	1.34E-06	9.68E-05	5.06833719
EXOSC9	0.440967275	10.18821513	5.016884394	1.34E-06	9.70E-05	5.065241834
RPS6KA2	0.717125416	11.27032687	5.016638483	1.34E-06	9.70E-05	5.064203587
UPP1	0.823524666	10.88395293	5.016330532	1.35E-06	9.70E-05	5.062903455
PERM1	1.000174997	3.455910237	5.015599466	1.35E-06	9.72E-05	5.059817218
ELMOD2	0.430710436	10.23545869	5.013606037	1.36E-06	9.80E-05	5.051403502
AC114803.3	1.225664335	3.847503561	5.012761665	1.37E-06	9.82E-05	5.047840373
SPRED2	0.6864274	11.56514546	5.012343459	1.37E-06	9.82E-05	5.046075768
AC114730.2	0.906820338	4.471649591	5.012258565	1.37E-06	9.82E-05	5.04571757
CACNA1H	0.940739441	8.43726023	5.010726509	1.38E-06	9.88E-05	5.0392541
SMURF2	0.486919423	10.50656773	5.007291914	1.40E-06	0.000100056	5.02476938
SLC25A32	0.449203347	9.848792102	5.007252867	1.40E-06	0.000100056	5.024604751
RP11-229P13.25	0.836063792	2.358300144	5.007021306	1.40E-06	0.000100056	5.023628453
SEL1L3	0.926012036	10.44471682	5.006382738	1.41E-06	0.000100222	5.02093632
ARPC5L	0.484264152	10.78136749	5.006103706	1.41E-06	0.000100226	5.019760033
DHX16	0.496446654	10.58256025	5.005286338	1.41E-06	0.000100473	5.016314605
EGR2	1.022255135	9.650304524	5.004844943	1.42E-06	0.000100551	5.014454175
KLF6	0.633572837	12.07212496	5.003870073	1.42E-06	0.000100843	5.010345635
INPP5F	0.703180084	10.33547941	5.003662369	1.42E-06	0.000100843	5.009470351
GALNS	0.583001656	10.24744969	5.003110159	1.43E-06	0.000100972	5.007143417
TMA16	0.443517465	9.225618644	5.002791009	1.43E-06	0.000100995	5.00579865
TBC1D19	0.45152421	8.241272519	5.000792269	1.44E-06	0.000101685	4.997378204
NDUFA10	0.426604398	11.96139136	5.000744846	1.44E-06	0.000101685	4.997178446
UACA	0.664604975	10.4256584	4.999802985	1.45E-06	0.000101885	4.993211378
FAM47E-STBD1	0.60651536	4.630033429	4.999774266	1.45E-06	0.000101885	4.993090425
STT3A	0.459937307	12.32479777	4.999320672	1.45E-06	0.00010197	4.99118011
POTENP	0.581447913	3.053222988	4.998609202	1.46E-06	0.000102095	4.988184007
LL0XNC01-250H12.3	0.689724192	3.328413075	4.998516901	1.46E-06	0.000102095	4.987795337
DNAH10OS	0.806801129	7.296202908	4.997434352	1.47E-06	0.000102471	4.983237226
OSBP	0.464882821	11.52604935	4.996957011	1.47E-06	0.000102554	4.981227592
C17orf62	0.467420202	11.89669458	4.996723526	1.47E-06	0.000102554	4.980244659
CEP290	0.696761962	9.049260191	4.993675976	1.49E-06	0.000103802	4.96741803
ZDHHC7	0.517455705	10.94674262	4.993505809	1.49E-06	0.000103802	4.966701993
FAM114A1	0.615362251	10.52443864	4.992250764	1.50E-06	0.000104266	4.961421507
LYAR	0.480151563	9.024137197	4.990815414	1.51E-06	0.000104817	4.955383593
RP11-611L7.2	0.943497398	5.356082009	4.990190998	1.51E-06	0.000104987	4.952757332
ALDOA	0.536676321	15.67551925	4.989220233	1.52E-06	0.000105321	4.948674818
LRFN3	0.589552694	9.935755171	4.988882243	1.52E-06	0.000105356	4.94725355
CCDC8	1.165632552	8.606187992	4.987945677	1.53E-06	0.000105676	4.943315606
STIP1	0.464072338	12.63479858	4.987105914	1.54E-06	0.00010595	4.939785145
COL5A3	0.8356752	11.31382302	4.98621043	1.54E-06	0.000106153	4.9360209
KCMF1	0.411832489	11.34902582	4.986153922	1.54E-06	0.000106153	4.935783381
DCSTAMP	1.083070567	3.657332684	4.985638486	1.55E-06	0.000106153	4.933616943
IL1RAP	1.004834114	11.34090918	4.985631696	1.55E-06	0.000106153	4.933588406
RIC8A	0.46537179	12.46947869	4.985272057	1.55E-06	0.0001062	4.932076899
SSBP4	0.525632169	11.33248792	4.983061777	1.56E-06	0.000107135	4.922789188
TMEM2	0.768756943	10.54116381	4.98269926	1.57E-06	0.000107155	4.92126616
PLBD2	0.633546323	11.70846302	4.982497559	1.57E-06	0.000107155	4.920418795
RP11-417L19.4	0.701408934	3.42399793	4.981096458	1.58E-06	0.000107628	4.914533342
GBE1	0.617246534	11.16275226	4.98058407	1.58E-06	0.000107628	4.912381308
ZDHHC1	0.703407076	9.350010382	4.980573494	1.58E-06	0.000107628	4.912336892
MIRLET7DHG	0.737860842	2.917040477	4.980174586	1.58E-06	0.000107628	4.910661589
FAM109A	0.571542685	9.483226577	4.979855869	1.59E-06	0.000107628	4.909323138
PSMD1	0.473398313	12.18592191	4.979753349	1.59E-06	0.000107628	4.908892619
UCK2	0.491327798	10.39727541	4.979701784	1.59E-06	0.000107628	4.908676081
CTB-89H12.4	0.602751816	8.950743487	4.977986241	1.60E-06	0.000108078	4.9014729
RP11-378G13.2	0.484903106	5.58508136	4.977941092	1.60E-06	0.000108078	4.901283357
GNA12	0.585774507	13.27923163	4.977913434	1.60E-06	0.000108078	4.90116724
ACVR1B	0.531359923	10.81369944	4.977739332	1.60E-06	0.000108078	4.900436335
DGKQ	0.625012029	9.517414239	4.977435316	1.60E-06	0.000108101	4.899160076
POM121C	0.617021109	11.64630235	4.976886906	1.61E-06	0.000108243	4.896857993
INPP5E	0.617168484	10.15036308	4.973950686	1.63E-06	0.000109445	4.884535658
RRS1	0.558572317	9.474757139	4.97391409	1.63E-06	0.000109445	4.884382111
SLC4A1AP	0.444125033	10.45002975	4.972226327	1.64E-06	0.00011015	4.877301577
COL13A1	1.269333001	5.997931771	4.971857281	1.64E-06	0.000110206	4.875753585
RP9	0.486464094	9.258594544	4.969942856	1.66E-06	0.000110992	4.867724714
PCGF3	0.530966299	10.83495284	4.96976276	1.66E-06	0.000110992	4.866969532
AP1S3	0.675487995	5.971842647	4.969262232	1.66E-06	0.000111011	4.864870806
WNT9A	1.169611477	5.146103597	4.969070736	1.66E-06	0.000111011	4.864067897
TCP11L1	0.490775964	8.757440074	4.968958698	1.67E-06	0.000111011	4.863598153
TXNDC5	0.69073092	7.389914909	4.968616867	1.67E-06	0.000111055	4.862165002
CTC-205M6.5	0.736837988	5.6198212	4.967818271	1.67E-06	0.000111327	4.858817108
SERPINE2	0.661347988	12.93261154	4.966999489	1.68E-06	0.000111609	4.855384999
KIAA0226L	0.828376447	9.551704849	4.966264379	1.69E-06	0.000111743	4.85230397
MYC	0.731185181	10.8217201	4.966004625	1.69E-06	0.000111743	4.851215357
NFKBIE	0.468439547	9.612388743	4.965972008	1.69E-06	0.000111743	4.851078665
EPS8L2	1.00927983	8.905410948	4.964839376	1.70E-06	0.000112142	4.846332381
ARL10	0.644463498	10.429119	4.964553039	1.70E-06	0.000112142	4.845132615
GOLGA3	0.572963548	11.35911704	4.964420356	1.70E-06	0.000112142	4.844576684
RP11-434H6.6	0.679667745	3.723008157	4.963380107	1.71E-06	0.000112539	4.840218497
SNX8	0.541911124	11.0187775	4.962886101	1.71E-06	0.000112661	4.838149065
PLXND1	0.707575022	12.4510286	4.961480721	1.72E-06	0.000113245	4.832262631
CRISPLD2	0.84992593	8.909137281	4.959983716	1.73E-06	0.000113762	4.825993768
RILPL1	0.504816616	9.672254409	4.959963577	1.73E-06	0.000113762	4.825909444
PKMP4	0.5313653	4.054085217	4.959607648	1.74E-06	0.000113815	4.824419162
DBNL	0.473236535	12.74943315	4.959183555	1.74E-06	0.000113904	4.82264358
NAT10	0.51020701	11.21210882	4.958116513	1.75E-06	0.000114322	4.818176603
IFNGR2	0.485652521	12.16552011	4.957236105	1.76E-06	0.000114645	4.814491466
PLAUR	0.857498995	10.24026296	4.956934673	1.76E-06	0.000114672	4.813229868
DTX2	0.497468175	9.039842633	4.956307837	1.76E-06	0.000114866	4.81060652
RNF121	0.429078729	10.06328013	4.95588288	1.77E-06	0.000114956	4.808828187
AIRE	1.173814484	5.028972281	4.955322318	1.77E-06	0.000115117	4.806482551
SRPR	0.474386648	12.11482951	4.954200873	1.78E-06	0.000115567	4.801790528
SHISA5	0.504962594	13.16933935	4.953486683	1.79E-06	0.000115809	4.798802823
SLC5A6	0.487452004	10.78692713	4.95161296	1.80E-06	0.000116654	4.790965896
CALU	0.640863079	13.54730554	4.951251891	1.80E-06	0.000116714	4.789455959
RP11-732A19.6	0.639921091	1.301913901	4.950927394	1.81E-06	0.000116754	4.78809903
CARM1	0.536004331	10.98718127	4.95037005	1.81E-06	0.000116916	4.78576857
BZW2	0.625796331	11.29907846	4.950022877	1.81E-06	0.000116968	4.784317006
AC093818.1	0.569650973	5.435316942	4.949354237	1.82E-06	0.000117189	4.781521575
MOB1B	0.561568689	10.41947761	4.94806057	1.83E-06	0.000117655	4.776113835
SPTY2D1	0.496901013	9.677462022	4.947974048	1.83E-06	0.000117655	4.775752195
TSR1	0.471221692	10.99980033	4.946915975	1.84E-06	0.000118073	4.771330104
SLC29A4	0.890755544	10.8665753	4.94668977	1.84E-06	0.000118073	4.770384797
MMP2	0.859854985	12.3582628	4.943899974	1.86E-06	0.000119424	4.758728884
ADRM1	0.458286402	11.91657133	4.941139238	1.89E-06	0.000120721	4.747199138
PFDN2	0.441830634	10.74625671	4.940993573	1.89E-06	0.000120721	4.746590921
BMP1	0.639494571	11.20097763	4.939029289	1.90E-06	0.00012148	4.73839048
CPPED1	0.665461888	9.428929352	4.93886266	1.91E-06	0.00012148	4.737694949
OSBP2	0.753252811	9.347738253	4.938855351	1.91E-06	0.00012148	4.737664442
MLXIP	0.653752233	11.17220231	4.937996382	1.91E-06	0.000121814	4.734079282
FSCN1P1	0.596245071	5.177904165	4.93723991	1.92E-06	0.000122069	4.730922307
CORO2A	0.858084092	6.325310549	4.9368094	1.92E-06	0.000122069	4.729125819
MSTO1	0.46625705	9.326935953	4.936745353	1.92E-06	0.000122069	4.728858566
AC108938.5	1.227594713	4.563015281	4.936554098	1.93E-06	0.000122069	4.728060519
TMEM8A	0.549795845	11.44675187	4.935974851	1.93E-06	0.000122253	4.725643637
TNKS1BP1	0.700777542	11.87860187	4.934676108	1.94E-06	0.00012283	4.720225456
TRPM4	0.607520637	9.205199427	4.933865643	1.95E-06	0.000123142	4.716844834
MSN	0.653570309	14.46917434	4.932788473	1.96E-06	0.000123602	4.712352358
HSPA4	0.470321138	12.37531401	4.931784569	1.97E-06	0.000123926	4.708166098
FNDC3B	0.65686776	10.96110582	4.931695293	1.97E-06	0.000123926	4.707793848
SCYL1	0.435986784	11.76814347	4.931477308	1.97E-06	0.000123926	4.706884947
PACS1	0.566864204	11.99206652	4.93038151	1.98E-06	0.000124399	4.702316416
ADAMTS4	0.877718267	10.12079761	4.92897749	1.99E-06	0.000125046	4.696463953
ADAM8	1.064581949	8.610310291	4.928675232	1.99E-06	0.000125081	4.695204191
SRD5A1	0.689588454	10.35287659	4.927099422	2.01E-06	0.000125713	4.6886374
BBS7	0.443867487	9.355436321	4.927062919	2.01E-06	0.000125713	4.688485304
TMEM127	0.465508918	12.1937482	4.925569971	2.02E-06	0.000126418	4.682265275
RP11-21L23.2	0.923111224	6.326091754	4.925049099	2.03E-06	0.000126576	4.680095507
OBSL1	0.587776683	12.48398861	4.924618632	2.03E-06	0.000126629	4.678302461
NFYA	0.469276978	10.0736479	4.924283948	2.03E-06	0.000126629	4.676908469
ACOT7	0.64050728	10.8345289	4.924236869	2.03E-06	0.000126629	4.676712382
CHMP7	0.445743056	11.06525823	4.923194475	2.04E-06	0.000127084	4.672371176
EI24	0.414474708	12.2990937	4.921310368	2.06E-06	0.000127997	4.664526234
ZNF697	0.710166193	7.83218932	4.921111025	2.06E-06	0.000127997	4.663696354
TMCO3	0.547396511	11.26989216	4.92057559	2.07E-06	0.000128089	4.661467409
FANCF	0.485745159	9.50684278	4.920291708	2.07E-06	0.000128089	4.660285716
ARPC2	0.439862894	13.35932755	4.920234368	2.07E-06	0.000128089	4.660047041
MTHFD1L	0.502263363	10.30004424	4.919885875	2.07E-06	0.000128153	4.658596479
C20orf166-AS1	1.511161869	3.609985051	4.918273635	2.09E-06	0.00012894	4.65188671
GRAMD1A	0.48843757	11.64057259	4.917533973	2.10E-06	0.000129229	4.64880895
BRD2	0.483903713	13.11362056	4.916659919	2.10E-06	0.000129571	4.645172416
FGFRL1	0.887061516	11.19056555	4.916466558	2.11E-06	0.000129571	4.644367996
PFKL	0.544319844	13.27770121	4.915910554	2.11E-06	0.000129756	4.642055039
RNPEP	0.42764208	11.09501569	4.915418733	2.12E-06	0.000129904	4.640009237
TRAF2	0.575811641	9.322718084	4.914339715	2.13E-06	0.000130392	4.63552144
LMAN1	0.544739653	11.93118016	4.913512523	2.13E-06	0.000130642	4.632081511
FBXW5	0.514733342	11.96530501	4.913439264	2.13E-06	0.000130642	4.631776879
TRAPPC11	0.4702465	10.60271498	4.912448992	2.14E-06	0.000131081	4.627659383
MATN1-AS1	0.710916301	5.196615058	4.911907237	2.15E-06	0.000131178	4.625407052
UBE3C	0.51165705	11.79433715	4.911270876	2.16E-06	0.000131178	4.622761636
HIVEP3	0.744124813	9.872380866	4.910952236	2.16E-06	0.000131178	4.621437112
ETF1	0.431169713	12.22428581	4.910706489	2.16E-06	0.000131178	4.620415633
TMEM255B	0.582187255	8.313883812	4.910682436	2.16E-06	0.000131178	4.620315657
PPP1R14BP3	0.52022929	7.224439549	4.910655142	2.16E-06	0.000131178	4.620202207
CSNK1A1	0.517188363	12.07020423	4.910630777	2.16E-06	0.000131178	4.620100934
UGP2	0.522852374	11.99275369	4.91040876	2.16E-06	0.000131178	4.619178134
PANX1	0.558239148	9.70503551	4.909899972	2.17E-06	0.000131311	4.617063509
DNMBP	0.684192048	9.695945751	4.909714575	2.17E-06	0.000131311	4.616292999
SIDT2	0.514944883	11.16577094	4.90832338	2.18E-06	0.000131908	4.610511891
ERICH1	0.520902081	8.967710631	4.908147393	2.19E-06	0.000131908	4.60978066
MSRA	0.471609255	10.19944251	4.90799793	2.19E-06	0.000131908	4.609159657
TRIP4	0.533507881	9.639042992	4.907114777	2.20E-06	0.000132246	4.605490521
KISS1R	1.493087388	4.748318133	4.906918607	2.20E-06	0.000132246	4.604675582
CD151	0.700359686	13.21979771	4.906726826	2.20E-06	0.000132246	4.603878898
RP11-168J18.6	0.523471096	3.717571195	4.906049647	2.21E-06	0.000132417	4.601065991
GS1-124K5.12	0.482833581	8.660198904	4.905911897	2.21E-06	0.000132417	4.600493833
POLG	0.510602741	10.69839209	4.905742571	2.21E-06	0.000132417	4.599790537
LSP1	0.828735792	10.39922457	4.905443764	2.21E-06	0.000132443	4.598549482
EIF2S3L	0.605272024	5.896327364	4.905169097	2.21E-06	0.000132443	4.597408744
TLDC1	0.482626412	9.090888542	4.90500715	2.22E-06	0.000132443	4.596736171
AKT1	0.579843932	12.558076	4.904483691	2.22E-06	0.000132616	4.594562332
SLC12A7	0.649643727	10.71964031	4.904238364	2.22E-06	0.000132625	4.593543588
PTPRE	0.694944076	10.85817938	4.903623262	2.23E-06	0.000132853	4.590989485
CEP164	0.621237673	10.20831979	4.903020193	2.24E-06	0.000133074	4.588485575
B3GAT3	0.460654216	11.445108	4.902218314	2.24E-06	0.000133413	4.585156574
TMEM61	1.030675806	3.478528601	4.901158012	2.25E-06	0.000133907	4.580755342
SMIM15	0.425254483	10.90785454	4.8987468	2.28E-06	0.000135212	4.570749198
RP11-380J14.1	1.119836386	2.442599321	4.896843763	2.30E-06	0.000136032	4.562854464
IGHMBP2	0.564994643	9.332529086	4.896601159	2.30E-06	0.000136032	4.561848189
SLC27A1	0.657479186	11.20229474	4.896590872	2.30E-06	0.000136032	4.561805521
CREB3L2	0.591588489	11.00922072	4.896472696	2.30E-06	0.000136032	4.561315361
AP001476.2	0.957248123	1.572281987	4.895618337	2.31E-06	0.000136339	4.557771993
OTULIN	0.4595921	9.627417892	4.895365604	2.31E-06	0.000136339	4.556723899
WTIP	0.723932844	8.535445308	4.895282726	2.31E-06	0.000136339	4.556380206
VAV2	0.754586898	10.96008241	4.894872158	2.32E-06	0.000136415	4.554677667
CCNI	0.44402937	13.95456248	4.894702789	2.32E-06	0.000136415	4.553975358
C18orf8	0.463784394	9.921727539	4.893241185	2.34E-06	0.000137165	4.547915404
UBTD2	0.467352624	10.72325611	4.891411224	2.35E-06	0.000138145	4.540330084
PAM	0.63270625	13.14387241	4.889152685	2.38E-06	0.000139396	4.530971169
TAGLN	0.93975495	12.18748099	4.888744443	2.38E-06	0.000139509	4.529279839
PRR33	1.031760267	3.09012136	4.887516391	2.40E-06	0.000139997	4.5241927
YIPF5	0.411098063	11.06218685	4.887505452	2.40E-06	0.000139997	4.524147391
CHCHD4	0.420392752	9.084320029	4.885599979	2.42E-06	0.000141044	4.516255954
MPRIP	0.589718399	12.83957245	4.884385885	2.43E-06	0.000141664	4.511229024
KLHL18	0.481293171	9.859263339	4.884114253	2.43E-06	0.000141693	4.510104461
PPP3CC	0.454054788	9.601491767	4.8838477	2.43E-06	0.000141719	4.509000971
RP5-1070A16.1	1.235703252	2.602960847	4.883181326	2.44E-06	0.000141997	4.506242483
NT5C3A	0.495308918	10.43575965	4.882204394	2.45E-06	0.000142471	4.502198922
AGPAT1	0.47114785	12.19672018	4.879993358	2.48E-06	0.000143731	4.493049567
MRRF	0.459073285	9.92057094	4.879554633	2.48E-06	0.000143762	4.491234467
TADA3	0.466280916	12.53781876	4.879366137	2.48E-06	0.000143762	4.490454659
AMMECR1L	0.470108732	10.4954562	4.879272649	2.48E-06	0.000143762	4.490067906
CTD-3247F14.2	1.050621609	2.512508165	4.878738607	2.49E-06	0.00014396	4.487858717
RBM15B	0.549695082	11.41481685	4.878503584	2.49E-06	0.000143968	4.486886548
CA9	1.539850915	8.572242073	4.877976117	2.50E-06	0.000144162	4.484704818
NACC1	0.555797853	11.84507813	4.877105307	2.51E-06	0.000144576	4.481103311
PHF20L1	0.479248502	10.79038301	4.876499678	2.52E-06	0.000144688	4.478598826
LCTL	0.824047698	7.473273984	4.876486366	2.52E-06	0.000144688	4.47854378
PLAGL2	0.602914851	10.07865022	4.875626607	2.52E-06	0.000145025	4.47498878
PDGFRB	0.741759302	11.96479649	4.875516453	2.53E-06	0.000145025	4.47453334
GNB1	0.43829629	14.52658897	4.874557661	2.54E-06	0.000145216	4.470569466
PGS1	0.455473884	10.34831008	4.874515161	2.54E-06	0.000145216	4.470393777
SCN9A	1.418949883	6.325140276	4.874333127	2.54E-06	0.000145216	4.469641274
CALD1	0.607595694	13.43297932	4.874332198	2.54E-06	0.000145216	4.469637432
MAP3K4	0.624601819	10.07772828	4.873354807	2.55E-06	0.000145703	4.465597398
AC046143.3	0.685455453	4.808678268	4.872030328	2.57E-06	0.000146417	4.460123635
SNX33	0.569343418	10.55976077	4.87026365	2.59E-06	0.000147422	4.452824083
BRD9	0.480929584	10.66514684	4.870031068	2.59E-06	0.00014743	4.45186325
TBXA2R	0.724705357	7.667716105	4.869473062	2.59E-06	0.000147636	4.449558169
SLC37A3	0.502499324	10.68331942	4.86927498	2.60E-06	0.000147636	4.448739957
POTEF	0.444102146	4.998808395	4.868588016	2.60E-06	0.000147819	4.445902516
RP11-61L23.2	0.94259011	5.630108693	4.868555286	2.61E-06	0.000147819	4.445767338
DCHS1	0.757164366	11.49946776	4.867797982	2.61E-06	0.000148171	4.442639723
RP11-403I13.8	0.618681527	6.213084035	4.865694682	2.64E-06	0.000149411	4.433955135
HSF1	0.461156178	11.62358622	4.865196792	2.64E-06	0.00014945	4.431899737
KHNYN	0.71291724	10.10743543	4.865127577	2.64E-06	0.00014945	4.431614016
BBS5	0.539070133	9.043579582	4.864777634	2.65E-06	0.00014945	4.430169485
BCAT1	0.948197191	11.9365064	4.864732987	2.65E-06	0.00014945	4.429985191
OSGIN1	0.785256689	7.543498082	4.864419516	2.65E-06	0.00014945	4.428691288
SH3BP5L	0.4632255	11.01574353	4.864323363	2.65E-06	0.00014945	4.428294412
CTD-2033D15.2	1.010244349	2.166298289	4.863481034	2.66E-06	0.000149755	4.424817916
CA12	1.154602192	11.45454146	4.863420914	2.66E-06	0.000149755	4.424569805
SLC16A6	0.71404732	7.694036029	4.863208823	2.67E-06	0.000149755	4.42369453
SCAMP3	0.413348157	11.72055213	4.862718232	2.67E-06	0.000149936	4.421670032
RNASEH1	0.490144391	9.022676545	4.86230084	2.68E-06	0.000150069	4.419947718
ACSS2	0.514718841	10.54118277	4.861375598	2.69E-06	0.000150456	4.416130222
ZP1	0.855182792	3.864685865	4.861283815	2.69E-06	0.000150456	4.41575156
RYBP	0.498284586	10.52519709	4.861004039	2.69E-06	0.000150498	4.414597343
RAI1	0.672857634	10.36397685	4.860754454	2.70E-06	0.000150521	4.413567716
INSIG2	0.510208796	10.56606448	4.858328478	2.73E-06	0.000151998	4.403561782
UBA1	0.495806267	14.00251178	4.857143856	2.74E-06	0.000152649	4.398677154
C11orf80	0.559456406	8.388090192	4.856655148	2.75E-06	0.000152833	4.39666229
ATXN7L3	0.46139272	11.33835565	4.856080365	2.75E-06	0.000152875	4.394292749
FBXL19	0.69791368	9.859787159	4.855957153	2.75E-06	0.000152875	4.39378483
AC068580.6	0.707446122	5.698766877	4.855947596	2.75E-06	0.000152875	4.393745436
DOHH	0.627707125	9.195452376	4.855104755	2.76E-06	0.000153299	4.39027127
UBA6	0.440657155	10.91868029	4.85320379	2.79E-06	0.000154444	4.382437188
TBX19	0.579900722	6.948447093	4.852384105	2.80E-06	0.000154694	4.379059879
KIAA0922	0.62064641	9.186581312	4.852347771	2.80E-06	0.000154694	4.378910185
AEN	0.618700064	10.66274483	4.852194327	2.80E-06	0.000154694	4.378278009
ARL8A	0.454257164	12.02813247	4.850787734	2.82E-06	0.00015551	4.372483645
SFT2D2	0.467202318	11.47607584	4.849738409	2.83E-06	0.000155811	4.368161836
B4GALT7	0.411939179	10.52270103	4.849631152	2.83E-06	0.000155811	4.367720122
CLP1	0.398911913	9.062822908	4.849605704	2.83E-06	0.000155811	4.367615321
VWA5A	0.705353958	10.68054421	4.849495535	2.83E-06	0.000155811	4.367161623
RP11-181E10.3	0.984259658	2.462657274	4.848685915	2.84E-06	0.000156221	4.363827676
WDR26	0.450825055	12.23500895	4.84693311	2.87E-06	0.000157286	4.356611185
HIF1A-AS2	0.92586208	2.764799588	4.844995503	2.89E-06	0.000158487	4.348636102
EIF3B	0.542985405	13.03618624	4.843688273	2.91E-06	0.000158997	4.343256955
PDAP1	0.491024627	12.64050552	4.84351465	2.91E-06	0.000158997	4.342542589
UBASH3B	0.62957888	9.387462419	4.843443871	2.91E-06	0.000158997	4.342251379
PGK1	0.638454762	14.77931146	4.842980622	2.92E-06	0.000158997	4.340345475
THBS2	0.774907467	11.67910985	4.842957084	2.92E-06	0.000158997	4.340248639
SGSH	0.498540379	10.55246634	4.842584447	2.92E-06	0.000158997	4.338715637
EFCAB13	0.781612283	5.687254482	4.842515328	2.92E-06	0.000158997	4.338431296
CTTNBP2NL	0.501221276	10.83006034	4.842408241	2.92E-06	0.000158997	4.337990768
G6PC3	0.487222151	12.34993789	4.842286603	2.93E-06	0.000158997	4.337490392
PALM3	0.857780516	7.136845	4.842001855	2.93E-06	0.000158997	4.33631907
IMMT	0.422329614	11.99724163	4.841935555	2.93E-06	0.000158997	4.33604635
HEXB	0.575614539	11.95539453	4.840914159	2.94E-06	0.000159357	4.331845268
KIF3B	0.546906866	11.70058019	4.840816027	2.94E-06	0.000159357	4.331441677
RARG	0.591750601	9.008183909	4.840485058	2.95E-06	0.000159357	4.330080537
C11orf84	0.50351828	9.990219057	4.840370854	2.95E-06	0.000159357	4.329610876
MYH9	0.74833167	13.67860786	4.840323511	2.95E-06	0.000159357	4.329416184
WDR46	0.416699294	10.92711959	4.840161162	2.95E-06	0.000159357	4.32874855
RP11-1094H24.4	0.863359338	3.578760439	4.838868645	2.97E-06	0.000160119	4.323433884
CDK13	0.506413456	11.22299406	4.838587396	2.97E-06	0.00016017	4.322277562
RELT	0.530766602	9.565046594	4.838192357	2.98E-06	0.000160278	4.320653494
CNNM4	0.519857502	9.306057106	4.838015982	2.98E-06	0.000160278	4.319928418
ADAMTS2	1.028708876	8.183018346	4.837539316	2.99E-06	0.000160334	4.317968952
CRK	0.43183287	12.12675714	4.837331461	2.99E-06	0.000160334	4.317114552
RP11-505E24.3	0.623122407	4.022650123	4.83729602	2.99E-06	0.000160334	4.31696887
CMTM3	0.502564229	11.82452553	4.837101872	2.99E-06	0.000160334	4.316170846
SYT12	0.938054291	8.559700825	4.836674566	3.00E-06	0.000160489	4.314414526
AC145676.2	0.941319288	4.291824007	4.835276486	3.02E-06	0.000161332	4.308668923
GS1-358P8.4	0.670479192	9.813979096	4.834439555	3.03E-06	0.00016178	4.305230031
DCPS	0.476664741	9.506105857	4.832775032	3.05E-06	0.000162821	4.298391936
AKAP17A	0.308890924	5.280139886	4.831875994	3.06E-06	0.000163317	4.29469929
C9orf64	0.739939397	9.545419578	4.831623765	3.07E-06	0.000163349	4.293663396
C7orf43	0.534099843	10.18579273	4.831215938	3.07E-06	0.000163494	4.291988546
FAM174A	0.481159189	9.165783836	4.830868515	3.08E-06	0.000163595	4.290561848
FLNA	0.784672918	14.90758427	4.830546338	3.08E-06	0.000163678	4.289238892
C7orf26	0.499478048	10.96437411	4.828672376	3.11E-06	0.00016486	4.281545128
PSMC3	0.461470847	12.61744666	4.828497073	3.11E-06	0.00016486	4.280825518
NOP16	0.446037991	9.657288872	4.827866562	3.12E-06	0.000165168	4.278237455
OSBPL10	0.847974261	8.938864613	4.82747016	3.12E-06	0.000165307	4.276610468
R3HDM4	0.493513195	11.43263295	4.826497208	3.14E-06	0.000165699	4.27261752
NADSYN1	0.493131004	10.86418348	4.826405835	3.14E-06	0.000165699	4.27224256
MED22	0.550514773	10.91440839	4.826314013	3.14E-06	0.000165699	4.271865765
ALS2	0.465837493	10.54354148	4.826050174	3.14E-06	0.000165741	4.270783117
FCRLB	0.66005003	6.661805451	4.8249947	3.16E-06	0.000166362	4.266452477
LRP1	0.73446048	14.88179998	4.824500768	3.16E-06	0.000166574	4.264426106
MOCOS	1.002257657	6.253529221	4.824168916	3.17E-06	0.000166667	4.263064758
PALM2-AKAP2	1.150328325	3.108339191	4.823469783	3.18E-06	0.000167029	4.260196952
BAIAP2L1	0.842364863	5.387081787	4.82237861	3.19E-06	0.000167534	4.255721639
HAUS3	0.452586135	9.328889764	4.82237479	3.19E-06	0.000167534	4.255705973
OPN3	0.617570458	7.677614021	4.820041031	3.23E-06	0.000169109	4.246136879
ELL	0.533186869	9.731754442	4.819398701	3.24E-06	0.000169364	4.243503741
HAPLN3	0.661153444	8.389499068	4.819166976	3.24E-06	0.000169364	4.242553883
RBAK	0.651025858	9.935931563	4.81908658	3.24E-06	0.000169364	4.242224344
RASAL2	0.606214505	9.956777964	4.818682829	3.25E-06	0.000169512	4.240569441
MMAA	0.435072816	8.569413299	4.817041806	3.27E-06	0.000170586	4.233844248
RAC1	0.447188886	14.34775909	4.816290508	3.28E-06	0.000170997	4.23076587
SRSF9	0.415357373	11.91058813	4.815226029	3.30E-06	0.000171645	4.226404871
RP5-1039K5.12	0.675972648	6.714527203	4.814100937	3.31E-06	0.000172342	4.221796333
ATG16L1	0.446380702	10.25217659	4.813578522	3.32E-06	0.00017247	4.219656718
RP11-516A11.1	0.551916217	6.010482857	4.813351421	3.32E-06	0.00017247	4.218726652
BTBD10	0.453476746	10.64469313	4.813087213	3.33E-06	0.00017247	4.21764466
NFKB1	0.537317636	10.54396412	4.812962151	3.33E-06	0.00017247	4.21713252
NUDT16	0.626035432	11.36666056	4.81282226	3.33E-06	0.00017247	4.216559662
HSPG2	0.943193798	11.56790977	4.812716128	3.33E-06	0.00017247	4.216125059
C14orf169	0.622656111	8.13271691	4.811979463	3.34E-06	0.000172876	4.213108658
TMEM256-PLSCR3	0.611657524	5.602748742	4.811580209	3.35E-06	0.000172893	4.211473985
GORASP2	0.361287408	12.00691082	4.811552963	3.35E-06	0.000172893	4.211362433
COL9A3	1.282870877	10.32853333	4.810910846	3.36E-06	0.000173214	4.208733629
THBD	0.942407715	9.032630201	4.81072809	3.36E-06	0.000173214	4.207985482
PRR7-AS1	0.699685843	4.863311957	4.80961254	3.38E-06	0.000173911	4.203419211
PRDM15	0.562751678	8.543001459	4.809011809	3.39E-06	0.00017412	4.20096057
THBS1	1.287343606	10.95699652	4.808928721	3.39E-06	0.00017412	4.200620529
FKBP1A	0.461105064	13.35353171	4.808655067	3.39E-06	0.00017412	4.199500623
CAPRIN2	0.601350937	10.43211316	4.808535634	3.39E-06	0.00017412	4.199011868
SF3B4	0.421534393	11.72648774	4.808012734	3.40E-06	0.00017412	4.196872116
TMEM120B	0.541870046	9.214622314	4.807955485	3.40E-06	0.00017412	4.196637859
GPATCH4	0.545452952	10.30419683	4.807805825	3.40E-06	0.00017412	4.196025475
MRC2	0.862703039	12.8284678	4.807736522	3.41E-06	0.00017412	4.195741903
RAB35	0.482394315	11.22074713	4.807367814	3.41E-06	0.000174249	4.194233287
PTGR1	0.604522171	10.21601786	4.806549305	3.42E-06	0.000174723	4.190884559
C19orf12	0.422739279	10.74379189	4.806141669	3.43E-06	0.000174883	4.189216977
MARK2	0.496807391	10.85511634	4.805894177	3.43E-06	0.00017492	4.188204571
VCP	0.475732908	13.52902974	4.805655977	3.44E-06	0.00017495	4.187230215
MAFG	0.613400779	10.72016226	4.805403273	3.44E-06	0.000174991	4.186196571
CTB-131K11.1	0.517368316	8.435047651	4.803291957	3.47E-06	0.000176465	4.177562148
CLMN	0.657897871	9.116839481	4.802158713	3.49E-06	0.00017719	4.172928811
FJX1	0.771631091	11.50293609	4.800595076	3.51E-06	0.00017821	4.166537122
CAMSAP1	0.631168152	11.02004294	4.800308397	3.52E-06	0.00017821	4.165365434
TCOF1	0.56427782	10.53285279	4.800254096	3.52E-06	0.00017821	4.165143504
KRT8P36	0.706076342	1.437088842	4.799038766	3.54E-06	0.000179006	4.160176933
AC092171.4	0.614225105	9.619600222	4.798729457	3.54E-06	0.000179094	4.15891306
NPAS2	0.858156919	9.706325445	4.797632223	3.56E-06	0.000179608	4.154430122
RNF128	1.482724995	5.695608239	4.797620212	3.56E-06	0.000179608	4.15438105
MOB3A	0.532848642	11.36371832	4.797346923	3.56E-06	0.000179608	4.153264603
ZNF18	0.473990993	8.947386935	4.797286328	3.57E-06	0.000179608	4.153017066
BCAS4	0.506252988	8.988684402	4.796201514	3.58E-06	0.000180291	4.148585864
FKBP14	0.560154416	9.976888104	4.79589514	3.59E-06	0.000180291	4.147334538
DCTD	0.463852633	11.69447256	4.795768729	3.59E-06	0.000180291	4.146818253
CHD1L	0.450575377	10.98945421	4.795611278	3.59E-06	0.000180291	4.146175208
SMPD1	0.540943346	11.50997764	4.795128103	3.60E-06	0.000180291	4.144201979
AC073333.8	0.70678755	2.005508778	4.795070915	3.60E-06	0.000180291	4.143968439
SVIL	0.816842867	9.124109123	4.794869352	3.60E-06	0.000180291	4.143145332
DUSP4	1.032893582	9.71964258	4.794848457	3.60E-06	0.000180291	4.143060004
HSPA12A	0.769033595	9.328466745	4.794461422	3.61E-06	0.000180442	4.141479575
SLC38A7	0.539653113	10.35015132	4.793640836	3.62E-06	0.000180919	4.138129088
TP53I13	0.528579419	10.63290955	4.793467412	3.63E-06	0.000180919	4.137421044
IARS2	0.473880033	11.68711744	4.793132424	3.63E-06	0.00018103	4.136053435
PTPRU	1.060465343	8.990200041	4.791978135	3.65E-06	0.000181792	4.131341523
MAN2B2	0.549128137	11.31232803	4.791655057	3.65E-06	0.000181894	4.130022844
RAD23B	0.451758479	12.69761922	4.791051691	3.66E-06	0.00018222	4.127560307
PARD6G	0.545450527	8.352758195	4.789092187	3.70E-06	0.000183632	4.119564536
NAP1L4	0.473671769	12.71845135	4.788691782	3.70E-06	0.000183798	4.117930983
ITGB1	0.63348263	12.66014436	4.787873921	3.72E-06	0.0001843	4.114594624
MYO1G	0.908675331	8.230273582	4.785973858	3.75E-06	0.00018568	4.106845215
ATP8B1	0.727442456	7.375291423	4.785479144	3.75E-06	0.000185808	4.104827898
ASCC3	0.532473999	10.82485827	4.785428504	3.76E-06	0.000185808	4.104621411
TMEM115	0.436521337	11.245185	4.784338613	3.77E-06	0.000186433	4.100177709
AGPS	0.412082577	10.94102176	4.78427273	3.77E-06	0.000186433	4.099909114
GPR89A	0.388377862	8.051407889	4.784049363	3.78E-06	0.000186458	4.098998505
CDC37	0.44526703	12.53088267	4.783719853	3.78E-06	0.000186489	4.097655237
LHX4-AS1	0.403101789	10.75777027	4.783624453	3.78E-06	0.000186489	4.097266345
SEMA7A	0.804958258	10.18038919	4.781723057	3.82E-06	0.000187845	4.08951665
CAMK1	0.56166552	9.394295257	4.781581512	3.82E-06	0.000187845	4.088939834
RP11-923I11.6	0.854586826	5.120594983	4.780291732	3.84E-06	0.000188748	4.083684388
RP1-292L20.3	0.585742667	4.65404601	4.780076397	3.84E-06	0.000188766	4.082807073
OPN1SW	0.646946989	6.869036752	4.779709233	3.85E-06	0.000188866	4.081311241
ANO1	0.934760932	6.861784432	4.779571332	3.85E-06	0.000188866	4.080749449
MYO5A	0.633385014	11.3438674	4.778980741	3.86E-06	0.000189195	4.078343604
EVA1B	0.626657407	9.096568777	4.778640828	3.87E-06	0.000189317	4.076959029
YWHAZP2	0.48247478	5.081190766	4.777723294	3.88E-06	0.000189792	4.073221983
MAPK11	0.6657074	9.844826019	4.777684365	3.88E-06	0.000189792	4.07306344
RP11-84A19.3	1.31854936	6.37878779	4.775590537	3.92E-06	0.000191313	4.064537499
CHST11	0.655591415	11.69182826	4.775473934	3.92E-06	0.000191313	4.064062783
NRF1	0.474309917	9.969056005	4.774977094	3.93E-06	0.000191457	4.062040128
RNF4	0.476148328	11.64144654	4.774918241	3.93E-06	0.000191457	4.061800547
COX19	0.51032505	9.127556132	4.774636187	3.94E-06	0.000191534	4.060652377
RNF214	0.461373349	9.453266543	4.774087514	3.95E-06	0.0001917	4.058419011
ACTR3	0.408713907	13.09306155	4.773994951	3.95E-06	0.0001917	4.058042252
HSP90AB3P	0.466362452	7.666197965	4.773844021	3.95E-06	0.0001917	4.057427937
CTGF	0.839269732	12.098467	4.773673972	3.95E-06	0.0001917	4.05673582
HUS1	0.466768053	9.641780487	4.77348454	3.96E-06	0.0001917	4.055964834
PLEKHB2	0.445188362	12.76365904	4.772633272	3.97E-06	0.000192254	4.052500472
RP11-815J4.7	0.481492447	4.707546808	4.772323684	3.98E-06	0.000192255	4.051240671
DNMT3A	0.584999922	10.75236304	4.77225308	3.98E-06	0.000192255	4.050953373
SH3KBP1	0.528604544	11.25114183	4.770453986	4.01E-06	0.00019361	4.043633644
ARMCX5	0.429015267	8.556003917	4.770176726	4.01E-06	0.000193684	4.042505779
AC112721.2	1.078203589	0.992468793	4.768736829	4.04E-06	0.000194703	4.036649216
AC011294.3	1.069159857	2.862210359	4.768595814	4.04E-06	0.000194703	4.036075731
SOST	1.277180675	2.13883624	4.767802351	4.06E-06	0.000195217	4.032849077
PPFIA4	0.865357805	9.407125793	4.767273987	4.07E-06	0.000195506	4.030700684
GGCT	0.513811365	10.15074212	4.766936333	4.07E-06	0.000195633	4.029327837
MMP14	0.855932986	13.11435633	4.765964519	4.09E-06	0.000196266	4.025376999
ADCY3	0.544269953	10.56325615	4.765818891	4.09E-06	0.000196266	4.02478501
SH2B3	0.62405248	10.92209146	4.765278309	4.10E-06	0.000196567	4.022587625
SNTB2	0.55058816	9.993283735	4.764553786	4.11E-06	0.000196874	4.019642841
ZNF408	0.478921851	9.453899961	4.764279152	4.12E-06	0.000196874	4.018526693
CTD-2267D19.1	0.729901578	4.352544742	4.764156901	4.12E-06	0.000196874	4.018029868
FOXK2	0.492288797	11.11390068	4.764059319	4.12E-06	0.000196874	4.017633301
RP3-439F8.1	1.207884037	4.145934769	4.76398149	4.12E-06	0.000196874	4.017317014
CARS2	0.421635609	10.65176271	4.763592937	4.13E-06	0.000197046	4.015738041
MAK16	0.42208024	9.920971345	4.762699558	4.15E-06	0.000197653	4.012107966
NFE2L3	0.833800597	8.915736002	4.761470422	4.17E-06	0.000198553	4.007114437
NDUFS2	0.424775645	12.20526409	4.760922747	4.18E-06	0.000198865	4.004889748
AP001062.7	0.717841178	6.893339656	4.759997938	4.20E-06	0.000199506	4.001133548
BLMH	0.420224389	10.96504903	4.759508018	4.20E-06	0.000199769	3.999143918
HEYL	0.724354034	9.638609024	4.759180708	4.21E-06	0.000199892	3.997814752
PODNL1	1.161498959	7.1703112	4.758507599	4.22E-06	0.000200066	3.995081556
HNRNPD	0.505750605	12.80651523	4.758472784	4.22E-06	0.000200066	3.994940195
KLF17	1.055931712	4.128496775	4.758253077	4.23E-06	0.000200066	3.994048129
AC017002.2	0.74405697	1.762209071	4.758234894	4.23E-06	0.000200066	3.993974302
LGALS3	1.051830069	12.68724222	4.758039837	4.23E-06	0.000200074	3.993182352
HNRNPA2B1	0.534526373	14.92923022	4.757706936	4.24E-06	0.000200202	3.991830797
EIF3F	0.376858291	12.65345015	4.757331432	4.25E-06	0.000200368	3.990306358
LASP1	0.523282764	12.90153106	4.755851661	4.27E-06	0.000201247	3.984299801
KLHL36	0.545902375	10.40104289	4.755830475	4.27E-06	0.000201247	3.984213815
FNDC8	0.670559879	2.854095902	4.75565069	4.28E-06	0.000201247	3.983484147
GTF2F2P1	0.561061852	1.12745484	4.755584859	4.28E-06	0.000201247	3.983216969
TSSC4	0.46231893	10.55686253	4.755234939	4.28E-06	0.000201392	3.98179687
CANX	0.473440364	15.28970215	4.754376317	4.30E-06	0.000201983	3.97831261
XPNPEP1	0.451607771	10.98980352	4.753119659	4.32E-06	0.000202928	3.973213984
ZSCAN22	0.494345588	8.343705577	4.752485988	4.34E-06	0.000203239	3.970643381
NBPF15	0.584013156	9.230666896	4.752398996	4.34E-06	0.000203239	3.970290501
PLEKHG2	0.663108705	11.18448353	4.750214484	4.38E-06	0.000205015	3.961430723
NOL10	0.452027906	10.17226698	4.749636855	4.39E-06	0.000205268	3.959088534
SNF8	0.421193035	11.34475824	4.749563147	4.39E-06	0.000205268	3.958789676
TUBB2A	0.610664533	12.1447458	4.74833199	4.41E-06	0.000206205	3.953798304
SIAE	0.642589551	10.77867355	4.748145004	4.42E-06	0.000206208	3.953040311
RALB	0.443082863	11.13405743	4.747047246	4.44E-06	0.000207029	3.948590718
CLTC	0.429201459	14.21274799	4.746607204	4.45E-06	0.000207166	3.946807295
RP11-539I5.1	0.996262796	5.811800649	4.746528537	4.45E-06	0.000207166	3.946488484
SIRT3	0.492236708	10.37945531	4.745929374	4.46E-06	0.00020754	3.944060396
CERS2	0.451351506	12.44989384	4.745453461	4.47E-06	0.000207805	3.94213194
CAPRIN1	0.421070378	13.51861252	4.743816464	4.50E-06	0.000209122	3.93549974
NSFL1C	0.425643806	11.97155898	4.74336392	4.51E-06	0.000209368	3.933666588
ZNRF1	0.511237724	10.08374834	4.742098914	4.54E-06	0.000210336	3.92854304
AC068580.5	0.832941616	3.060863192	4.741936483	4.54E-06	0.000210336	3.927885233
DIAPH1	0.514850072	11.71780096	4.74110198	4.56E-06	0.000210933	3.924505961
PHF13	0.550442338	10.31939624	4.739472098	4.59E-06	0.000211959	3.917907145
APP	0.546269987	15.84592092	4.739378459	4.59E-06	0.000211959	3.917528085
TESK1	0.513281246	10.57002532	4.73924192	4.59E-06	0.000211959	3.916975373
BCAR1	0.586782145	11.58546867	4.739103885	4.60E-06	0.000211959	3.916416614
PROS1	0.815666714	11.2676708	4.739073718	4.60E-06	0.000211959	3.916294502
DNAJC7	0.461298117	11.44311448	4.738640152	4.60E-06	0.000212191	3.914539544
UNC45A	0.479007746	11.58265384	4.738129943	4.61E-06	0.000212494	3.912474511
TRIP12	0.468057974	12.49643056	4.737522822	4.63E-06	0.000212887	3.910017455
CAV2	0.910303332	10.09107663	4.737140415	4.63E-06	0.000213073	3.908469949
P3H4	0.53274664	10.74009949	4.736842669	4.64E-06	0.000213181	3.907265111
RAB14	0.457768162	12.68658787	4.736208197	4.65E-06	0.000213601	3.904697892
CTDP1	0.508180155	9.864376877	4.73492971	4.68E-06	0.000214621	3.899525627
C16orf72	0.465122362	11.12153794	4.734683843	4.68E-06	0.000214682	3.898531064
P4HA3	0.901579562	5.502812172	4.734296809	4.69E-06	0.000214874	3.896965544
VPS9D1	0.560516947	10.45284791	4.73129738	4.75E-06	0.000217519	3.884836361
ARHGAP23	0.683033457	11.47174803	4.730818647	4.76E-06	0.0002178	3.88290098
CANT1	0.482502068	11.5520911	4.730347494	4.77E-06	0.000218075	3.88099639
CCT8	0.407411978	12.60403244	4.730006968	4.78E-06	0.000218227	3.879619935
SERPINB8	0.580847356	9.706618014	4.729525043	4.79E-06	0.000218273	3.877672052
LARP1	0.588833417	12.74841198	4.729434446	4.79E-06	0.000218273	3.877305888
GTF2E2	0.422808732	9.856156282	4.729312625	4.79E-06	0.000218273	3.876813532
GMDS	0.412131368	9.069350816	4.729238646	4.80E-06	0.000218273	3.876514539
SRD5A3	0.49642754	9.704799685	4.728914698	4.80E-06	0.000218409	3.875205325
DHX32	0.471083448	10.08356835	4.72858032	4.81E-06	0.000218425	3.873854028
DGKZ	0.604294245	11.85342358	4.728539635	4.81E-06	0.000218425	3.873689617
PCOLCE	1.032558351	10.92590483	4.728198998	4.82E-06	0.000218569	3.872313109
AMPD2	0.516420641	11.5348305	4.728028823	4.82E-06	0.000218569	3.871625465
SH3BGRL3	0.540915791	12.79521117	4.727786638	4.83E-06	0.000218629	3.87064687
TRAF3	0.58618791	10.34726797	4.727119535	4.84E-06	0.000219028	3.867951516
FKBP1C	0.453730033	6.860669879	4.726813441	4.85E-06	0.000219028	3.866714874
VKORC1L1	0.460458218	11.49565046	4.726759918	4.85E-06	0.000219028	3.866498641
TOR1AIP2	0.379443762	11.4179748	4.726565656	4.85E-06	0.000219028	3.865713845
CAPN10	0.52919149	9.805165369	4.726473123	4.85E-06	0.000219028	3.865340035
KDM5C	0.580624306	12.03795708	4.726213298	4.86E-06	0.000219043	3.864290423
GLRX2	0.446063489	8.310526986	4.726101768	4.86E-06	0.000219043	3.863839894
GUSB	0.540068409	11.78262916	4.725869977	4.87E-06	0.000219094	3.862903587
TUBGCP2	0.436714346	11.22507484	4.725398568	4.88E-06	0.000219325	3.860999464
ABCC3	1.20803076	10.85553763	4.72520404	4.88E-06	0.000219325	3.860213765
TNIP2	0.464465558	10.35222594	4.725061903	4.88E-06	0.000219325	3.859639686
LETM1	0.513889203	11.27952814	4.724848332	4.89E-06	0.000219325	3.85877712
AP5Z1	0.532709042	11.1332232	4.724739488	4.89E-06	0.000219325	3.858337535
TIMM17A	0.42031104	11.18267955	4.723838683	4.91E-06	0.000219986	3.85469977
HMGA1P3	0.600510494	2.316589198	4.723612938	4.91E-06	0.000219986	3.853788212
ARSB	0.457462732	10.09221818	4.723513842	4.92E-06	0.000219986	3.853388073
NUDT9	0.429440055	10.48609498	4.723334382	4.92E-06	0.000219989	3.852663455
RTCA	0.402679899	10.52602826	4.72285929	4.93E-06	0.000220218	3.850745231
LSM11	0.501254699	8.357533424	4.722740421	4.93E-06	0.000220218	3.85026531
CDC27	0.412162224	11.24867152	4.721995216	4.95E-06	0.000220762	3.847256832
B4GALT3	0.425831076	10.88525576	4.721471901	4.96E-06	0.000221015	3.845144367
AP2M1	0.424788353	14.26850946	4.72135516	4.96E-06	0.000221015	3.844673143
SNRPA1	0.40914697	10.26167148	4.721201902	4.97E-06	0.000221015	3.84405453
FOXL1	0.851479367	5.978122621	4.720866787	4.97E-06	0.000221049	3.842701922
GAPDHP32	0.56137499	2.788750943	4.720664836	4.98E-06	0.000221049	3.841886832
CHMP4B	0.438415146	12.65611309	4.720639387	4.98E-06	0.000221049	3.841784118
SEMA5A	0.814989643	12.09496569	4.720119308	4.99E-06	0.000221379	3.839685169
AKAP8	0.474179915	10.4809448	4.719645927	5.00E-06	0.000221665	3.837774835
NAGLU	0.477639891	10.90301806	4.718817888	5.02E-06	0.000222293	3.834433625
PALM2	1.048431381	4.723056436	4.718348363	5.03E-06	0.000222576	3.832539245
CLEC5A	1.10678078	9.021244086	4.717974729	5.04E-06	0.000222658	3.831031855
TNPO3	0.570135136	11.63410491	4.717914203	5.04E-06	0.000222658	3.830787676
VPS53	0.498669587	10.86285132	4.717417997	5.05E-06	0.000222968	3.828785945
PHC2	0.488562257	13.51703811	4.716881333	5.06E-06	0.000223318	3.826621178
EPT1	0.454035623	10.6351429	4.716694357	5.06E-06	0.00022333	3.825867007
TTC39C	0.513792237	9.129627656	4.715686199	5.09E-06	0.000224137	3.821800977
MICALCL	0.855150774	3.133896697	4.715371924	5.09E-06	0.000224141	3.8205336
H19	1.961135724	8.521732745	4.715125685	5.10E-06	0.000224141	3.819540638
RP11-395G23.3	0.713952961	8.3074584	4.715112176	5.10E-06	0.000224141	3.819486164
MLPH	1.122850932	5.270186728	4.714857582	5.10E-06	0.000224141	3.818459551
PRCC	0.396962452	11.81778631	4.714812461	5.11E-06	0.000224141	3.818277613
TTC17	0.495777694	11.21969554	4.714247568	5.12E-06	0.000224521	3.815999931
ISG20	0.65370192	8.635393661	4.713472678	5.14E-06	0.000225106	3.812875869
CPOX	0.422106167	9.661694303	4.713163671	5.14E-06	0.00022517	3.811630179
RASA3	0.614716944	11.32883697	4.713059745	5.14E-06	0.00022517	3.811211239
CCDC43	0.406608	9.998396077	4.712321994	5.16E-06	0.000225583	3.808237462
SLC45A4	0.598235146	8.796362624	4.712290655	5.16E-06	0.000225583	3.808111144
ZC3HAV1L	0.872888563	6.586448172	4.711925065	5.17E-06	0.000225771	3.806637637
PIK3CD-AS2	0.850099217	5.784461976	4.711392157	5.18E-06	0.000226123	3.80448991
KPNB1	0.512082713	13.38598466	4.710171944	5.21E-06	0.00022715	3.7995729
AC133528.2	0.500832822	7.360444557	4.708929571	5.24E-06	0.000228203	3.79456758
PMM2	0.485171863	8.338786552	4.708181679	5.25E-06	0.000228772	3.791554923
FAM120A	0.495262635	12.50978177	4.707131236	5.28E-06	0.000229642	3.787324146
ZNF316	0.727915771	11.06730142	4.706812618	5.29E-06	0.000229787	3.786041015
TPSG1	0.871929024	2.1082261	4.70639433	5.30E-06	0.000229929	3.784356597
XXyac-YX65C7_A.2	0.78948962	5.040767392	4.706325523	5.30E-06	0.000229929	3.784079528
SCFD2	0.508101812	10.15791489	4.706085159	5.30E-06	0.000229997	3.78311166
COPB2	0.427878559	12.62292131	4.703822466	5.35E-06	0.000231999	3.774002357
ZBTB7A	0.572898307	10.33142991	4.703736359	5.36E-06	0.000231999	3.773655768
TMEM185B	0.645299549	9.488673719	4.703192761	5.37E-06	0.000232372	3.771467838
LIMS1	0.515662549	11.58569033	4.702990084	5.37E-06	0.000232404	3.770652132
RAB43	0.657540305	5.671052943	4.701978967	5.40E-06	0.000232886	3.766583123
PORCN	0.448547506	9.551491097	4.70197075	5.40E-06	0.000232886	3.766550059
LMLN	0.609380287	9.053999844	4.701922337	5.40E-06	0.000232886	3.766355251
VASP	0.498110913	11.15899924	4.701756126	5.40E-06	0.000232886	3.765686442
IDS	0.628544207	9.01868333	4.701654618	5.40E-06	0.000232886	3.765277995
DIS3L2	0.457318711	9.702489295	4.701481822	5.41E-06	0.000232888	3.764582722
ATF6	0.42937174	11.39506499	4.701234494	5.41E-06	0.000232965	3.763587586
LIF	1.311999019	9.114381789	4.700724254	5.43E-06	0.000233288	3.761534742
UBE2G1	0.397954269	11.08320634	4.70057325	5.43E-06	0.000233288	3.760927238
AC018804.7	0.57102296	4.520773928	4.700137759	5.44E-06	0.000233459	3.759175305
PIGT	0.482654618	12.67408676	4.699950873	5.44E-06	0.000233459	3.758423523
LYPLA2	0.440139997	10.78278512	4.699892694	5.45E-06	0.000233459	3.758189491
SPSB1	0.674898477	10.41472381	4.699306139	5.46E-06	0.00023388	3.755830129
CTNND1	0.534064129	13.0787106	4.698961828	5.47E-06	0.000234056	3.754445277
PSMD12	0.399819632	11.39128057	4.698400227	5.48E-06	0.000234452	3.752186626
ARF6	0.470867418	11.56444145	4.698084453	5.49E-06	0.00023453	3.75091673
TBC1D9B	0.539991729	12.81119224	4.697984386	5.49E-06	0.00023453	3.750514322
ODF2	0.540770717	10.98160772	4.697433033	5.50E-06	0.000234917	3.748297234
VDAC1P2	0.476874747	4.038975608	4.695000309	5.56E-06	0.000237224	3.73851717
FXR2	0.509880162	11.12425717	4.694780666	5.57E-06	0.000237275	3.737634348
RPTOR	0.573462166	10.95705741	4.693974035	5.59E-06	0.000237929	3.73439248
ELK3	0.5620998	10.98542491	4.693558988	5.60E-06	0.000238082	3.732724561
RP11-118K6.3	0.767572224	4.082179683	4.693487104	5.60E-06	0.000238082	3.732435699
FAM50A	0.421980271	11.53553432	4.693251784	5.60E-06	0.00023815	3.731490097
EIF4G1	0.577949752	13.51161803	4.692366594	5.63E-06	0.000238888	3.727933397
UBQLN1	0.456760332	12.51127738	4.691677399	5.64E-06	0.000239425	3.725164559
ZSWIM4	0.591654476	9.670681294	4.690929846	5.66E-06	0.000240024	3.722161618
TBX2	0.72513299	10.20710259	4.690702795	5.67E-06	0.000240035	3.721249621
PAPD7	0.552379948	10.23578297	4.690572891	5.67E-06	0.000240035	3.720727849
SEPT7P2	0.524508269	9.201200413	4.690414026	5.67E-06	0.000240035	3.720089766
GAR1	0.428227397	9.465525937	4.690124986	5.68E-06	0.00024005	3.718928878
ZNF746	0.501132382	10.62564148	4.690031659	5.68E-06	0.00024005	3.718554058
UMPS	0.406673187	10.38995562	4.689896616	5.69E-06	0.00024005	3.718011701
MEIS3P2	0.784598196	5.232280313	4.68969949	5.69E-06	0.00024008	3.717220032
NES	0.831523249	14.75846268	4.688468861	5.72E-06	0.000241131	3.712278332
URGCP	0.519176714	11.19536247	4.688301317	5.73E-06	0.000241131	3.711605621
NARF	0.441293476	11.33451168	4.688116107	5.73E-06	0.000241131	3.710861997
CDR2L	0.556187008	10.07597141	4.688017197	5.73E-06	0.000241131	3.710464884
BCKDK	0.474296635	11.44059458	4.687708415	5.74E-06	0.000241171	3.709225186
SH3BP4	0.613032599	11.22013148	4.687508014	5.74E-06	0.000241171	3.708420647
EXOC8	0.445275429	9.192948646	4.687477997	5.75E-06	0.000241171	3.708300144
INTS4	0.435928386	10.03399249	4.686767984	5.76E-06	0.000241642	3.705449926
BHLHA15	0.860957259	2.726439583	4.686692628	5.77E-06	0.000241642	3.705147441
AVL9	0.534851312	11.12812958	4.684990145	5.81E-06	0.000243014	3.698314552
SWAP70	0.621899542	11.07099808	4.684893904	5.81E-06	0.000243014	3.697928345
ATP1B3	0.439179101	12.32452679	4.684879631	5.81E-06	0.000243014	3.697871069
TPI1P1	0.529450382	8.652632985	4.684676452	5.82E-06	0.000243053	3.697055754
EPAS1	0.643284483	13.03045104	4.684332031	5.82E-06	0.000243174	3.695673725
TBRG1	0.432240426	10.12179321	4.68422826	5.83E-06	0.000243174	3.695257346
TNFRSF25	0.814047955	7.721232794	4.683690115	5.84E-06	0.000243565	3.693098167
POM121	0.612768656	11.31180189	4.683042725	5.86E-06	0.000244071	3.690500913
FAM98A	0.419623755	10.85466763	4.682855951	5.86E-06	0.000244093	3.689751652
EFNB2	0.685931454	11.03671625	4.682367992	5.87E-06	0.000244397	3.687794255
SH3BP5	0.777454099	7.90659347	4.682235997	5.88E-06	0.000244397	3.687264801
CSPG4	0.842224891	12.35064511	4.681709971	5.89E-06	0.000244777	3.685154924
LPGAT1	0.515881298	10.57410327	4.681435459	5.90E-06	0.000244822	3.684053934
GATAD2A	0.530111892	11.82518031	4.681200811	5.90E-06	0.000244822	3.683112868
PFN1	0.432585958	14.32108655	4.681171826	5.90E-06	0.000244822	3.682996624
ZNF618	0.72240251	8.760354515	4.680825256	5.91E-06	0.000245014	3.681606759
OLFML2A	0.727519792	9.969471195	4.680254303	5.93E-06	0.000245204	3.679317212
BAG6	0.46105293	13.14815575	4.680106746	5.93E-06	0.000245204	3.678725534
PLK2	0.7531317	9.987656222	4.680036669	5.93E-06	0.000245204	3.678444546
PSMC1P1	0.447340112	6.742573112	4.679986883	5.93E-06	0.000245204	3.678244917
GALNT2	0.581889407	12.59771398	4.679332391	5.95E-06	0.000245722	3.675620753
DENR	0.397733927	11.54482811	4.679079588	5.96E-06	0.000245816	3.674607218
GPAA1	0.459554446	12.43363754	4.678549774	5.97E-06	0.000246204	3.672483236
RP11-218E20.5	0.683887505	2.64923146	4.678202868	5.98E-06	0.000246398	3.671092616
PURB	0.481594876	11.96557845	4.677633429	5.99E-06	0.000246828	3.66881011
DEGS1	0.399233693	12.23948922	4.677468148	6.00E-06	0.00024683	3.668147645
MAPKAPK2	0.472488419	12.19786417	4.67599729	6.04E-06	0.000248056	3.662253078
AC090804.1	0.495271484	3.707058314	4.67598979	6.04E-06	0.000248056	3.662223023
SSH1	0.585334199	10.86731244	4.674840093	6.07E-06	0.000249111	3.657616519
PLXNB2	0.66359054	12.9281229	4.674625554	6.07E-06	0.000249166	3.656757015
EID2	0.440495084	9.718417288	4.672879044	6.12E-06	0.000250869	3.649761137
NID2	0.858097695	9.212738185	4.67255572	6.13E-06	0.000251041	3.648466239
CEP55	0.675811839	8.448254468	4.672350144	6.13E-06	0.000251087	3.647642947
FAM20B	0.443645726	10.900083	4.671724637	6.15E-06	0.000251587	3.645138097
UBE2H	0.59176492	13.14658624	4.671288156	6.16E-06	0.000251746	3.643390351
NEDD9	0.687653659	11.20112804	4.671252325	6.16E-06	0.000251746	3.643246882
API5	0.451450504	11.98601543	4.671012608	6.17E-06	0.00025183	3.642287072
EIF4E2	0.350137391	11.30799886	4.67062098	6.18E-06	0.000252078	3.640719103
CHST2	0.683063917	11.38009021	4.670380206	6.18E-06	0.000252163	3.63975516
EXOC3L2	0.916644729	6.448896661	4.66990589	6.20E-06	0.000252317	3.637856337
Sep-11	0.550001626	12.73570678	4.66975399	6.20E-06	0.000252317	3.637248269
AGRN	0.724138196	13.35079523	4.669751491	6.20E-06	0.000252317	3.637238264
IGF2BP2	1.235179757	8.867830459	4.668644281	6.23E-06	0.000253344	3.632806468
TMEM184C	0.458969807	10.97358999	4.668424181	6.24E-06	0.000253407	3.631925572
LONP1	0.559028261	12.18481846	4.667740831	6.26E-06	0.000253976	3.629190847
DDB2	0.583221976	10.22068815	4.666839312	6.28E-06	0.000254729	3.625583481
RP11-350N15.4	1.036873019	3.996241192	4.666728475	6.28E-06	0.000254729	3.625140012
RP11-248J18.2	0.582778925	4.240725018	4.666453462	6.29E-06	0.000254854	3.62403969
MIR4435-1HG	0.774988051	10.3523353	4.665176711	6.32E-06	0.000256078	3.618932089
PRR16	0.860706431	6.376292362	4.664763552	6.34E-06	0.000256355	3.617279488
TRPV4	0.74630241	6.132168404	4.663278543	6.38E-06	0.000257667	3.611340488
MIR22HG	0.652267798	9.370467877	4.663107605	6.38E-06	0.000257667	3.610656949
EPN1	0.471434343	12.72108968	4.663092431	6.38E-06	0.000257667	3.610596274
GAPDHP69	0.576426019	5.491363256	4.662564005	6.40E-06	0.000257883	3.608483351
RP11-230F18.5	0.828644336	4.647100965	4.662429456	6.40E-06	0.000257883	3.60794538
RP11-209M4.1	0.594632939	1.973001502	4.662275173	6.40E-06	0.000257883	3.607328526
RP1-191J18.66	0.531181762	4.81131667	4.662253873	6.40E-06	0.000257883	3.607243363
DAZAP1	0.490653153	11.15181701	4.661972999	6.41E-06	0.000258016	3.606120415
PPP6R1	0.52667147	11.74604139	4.661799889	6.42E-06	0.00025803	3.605428335
PRKACA	0.443346171	12.3123051	4.661052438	6.44E-06	0.000258682	3.602440319
WDR5	0.527563321	11.04325601	4.660538924	6.45E-06	0.000259075	3.600387701
TBC1D2	0.627645798	8.599668079	4.660066207	6.46E-06	0.00025936	3.598498309
PLOD2	0.720088809	11.97946574	4.659951853	6.47E-06	0.00025936	3.598041272
MROH1	0.566176546	10.15370292	4.65980201	6.47E-06	0.00025936	3.597442408
PRKCI	0.45429909	10.27937145	4.659608892	6.48E-06	0.000259398	3.596670616
SNRNP35	0.41706616	9.469847189	4.659177625	6.49E-06	0.000259617	3.594947148
PRKAR1A	0.447346893	13.14545649	4.65909227	6.49E-06	0.000259617	3.594606059
SAP30	0.468890797	10.30840858	4.658821514	6.50E-06	0.000259741	3.593524118
ACTR2	0.443644588	13.26024439	4.658407688	6.51E-06	0.000259768	3.591870561
ADAM15	0.522610933	11.72311443	4.658359316	6.51E-06	0.000259768	3.591677285
PLEKHH2	0.882987694	8.643238312	4.658319612	6.51E-06	0.000259768	3.591518645
CTSA	0.535086536	12.7092529	4.658120215	6.52E-06	0.000259813	3.590721948
LSS	0.566862528	11.72766117	4.656809215	6.56E-06	0.000261009	3.585484469
ATP6AP1	0.445980384	13.32728133	4.656732103	6.56E-06	0.000261009	3.585176439
AP2A2	0.49043031	12.21394442	4.656338147	6.57E-06	0.000261273	3.583602813
LOX	1.142286415	10.52524003	4.655777125	6.58E-06	0.000261704	3.58136203
CDKN1A	0.823799243	12.47451221	4.655560474	6.59E-06	0.000261704	3.580496756
AAK1	0.585471221	10.63523483	4.655410906	6.60E-06	0.000261704	3.579899421
TGFBI	0.930871857	12.90584761	4.655182537	6.60E-06	0.000261704	3.578987405
SND1	0.450726759	12.90196698	4.655161173	6.60E-06	0.000261704	3.578902085
ATXN1	0.522960005	11.14184617	4.65415918	6.63E-06	0.000262653	3.574900927
ITGB1P1	0.604603541	5.807894371	4.653487869	6.65E-06	0.000263232	3.572220618
GGT5	0.706994608	10.88994492	4.652755559	6.67E-06	0.000263707	3.569297091
TRMT44	0.451759117	8.492354219	4.652752002	6.67E-06	0.000263707	3.569282892
RP11-394D2.1	0.467310487	3.542347324	4.652192123	6.69E-06	0.00026414	3.567047983
KLHDC10	0.543132072	11.64908958	4.652053409	6.69E-06	0.00026414	3.566494302
DARS2	0.43009881	9.808305681	4.651539739	6.71E-06	0.000264544	3.564444075
PDLIM2	0.473359955	9.924404351	4.651021924	6.72E-06	0.000264953	3.562377478
FLNB	0.682660636	11.09995982	4.650386584	6.74E-06	0.000265497	3.559842082
EAF1	0.476493018	10.79108802	4.649745937	6.76E-06	0.000266036	3.557285772
NAA25	0.491514445	9.900211147	4.649598801	6.76E-06	0.000266036	3.556698704
TREH	0.91096338	3.452462764	4.64811738	6.80E-06	0.000267084	3.550788709
COL5A2	0.87338986	12.06837483	4.64799833	6.81E-06	0.000267084	3.550313829
HOOK3	0.435847606	10.93630609	4.64793496	6.81E-06	0.000267084	3.550061058
RP11-415J8.3	0.734979292	7.05460856	4.647908363	6.81E-06	0.000267084	3.549954969
PSMD4	0.37946831	12.61120183	4.647896825	6.81E-06	0.000267084	3.549908945
MTCL1	0.766882322	9.103858493	4.64746054	6.82E-06	0.000267404	3.548168762
CILP2	1.033216768	4.547714848	4.647070383	6.84E-06	0.000267672	3.54661267
NUTM2B-AS1	0.492938139	7.93629961	4.646078734	6.86E-06	0.000268631	3.542658054
TRADD	0.537119192	9.089364542	4.645857246	6.87E-06	0.000268706	3.541774866
SNHG4	0.697200248	5.819084851	4.644567844	6.91E-06	0.000270014	3.536633979
Sep-05	0.662075338	11.49149277	4.643998946	6.93E-06	0.000270492	3.534366113
MYO1B	0.716054754	10.75601792	4.643428483	6.94E-06	0.000270972	3.532092217
NOP14-AS1	0.485649728	9.588826586	4.64232408	6.98E-06	0.000271825	3.527690615
RAB38	0.848770631	5.617468093	4.64218142	6.98E-06	0.000271825	3.527122101
C4orf3	0.481777275	12.66823059	4.642161492	6.98E-06	0.000271825	3.527042689
POFUT1	0.52922373	12.07164624	4.642071449	6.98E-06	0.000271825	3.526683866
EMILIN1	0.827781948	11.56444868	4.641816087	6.99E-06	0.000271941	3.525666277
GPR161	0.674370182	10.09158731	4.641002392	7.02E-06	0.000272708	3.522424073
CHFR	0.458839862	10.45355733	4.640741186	7.02E-06	0.000272832	3.521383378
ISY1	0.414733206	9.373350941	4.640270018	7.04E-06	0.000273201	3.519506266
DYNC1LI1	0.401146392	10.74671083	4.639601133	7.06E-06	0.000273802	3.516841709
GTPBP2	0.484766621	10.99671633	4.638763408	7.08E-06	0.000274603	3.513504978
POPDC2	0.520058694	7.17545214	4.635800512	7.17E-06	0.000277922	3.501707185
CAMKK2	0.466503562	10.95684338	4.63523918	7.19E-06	0.000278406	3.499472694
NIPA2	0.443698183	10.80046751	4.634651683	7.21E-06	0.000278921	3.49713427
ZNF398	0.487905259	9.946627742	4.633687893	7.24E-06	0.000279888	3.493298575
RP5-907D15.4	1.069689506	4.555133818	4.633518654	7.24E-06	0.000279905	3.492625099
CNOT3	0.517086415	11.02826201	4.633041582	7.26E-06	0.000280276	3.49072672
FBXL6	0.56417696	9.234773963	4.632899462	7.26E-06	0.000280276	3.490161222
G6PD	0.513078476	11.28003535	4.632618273	7.27E-06	0.000280428	3.489042405
CAPN5	0.705257385	12.19416246	4.632445594	7.28E-06	0.00028045	3.488355359
PPP1R9B	0.544381348	11.98628799	4.63142956	7.31E-06	0.000281404	3.484313227
RBMS1	0.555905409	10.83067586	4.63134304	7.31E-06	0.000281404	3.483969049
AP001476.4	0.475181815	0.361542825	4.630658212	7.33E-06	0.000281988	3.481244989
LRRC4C	0.851222874	9.342336153	4.630273045	7.34E-06	0.000281988	3.479713032
SLC35A4	0.427142848	12.21624272	4.630224838	7.35E-06	0.000281988	3.479521299
WIPF1	0.50495587	11.45018813	4.630113445	7.35E-06	0.000281988	3.479078268
RP11-817I4.1	0.641017479	6.200131079	4.630088347	7.35E-06	0.000281988	3.478978449
EIF4A1P7	0.382146882	4.17406494	4.62949196	7.37E-06	0.000282522	3.476606656
SLC38A10	0.522447767	11.69347602	4.62922032	7.38E-06	0.000282664	3.475526438
GRSF1	0.41095367	12.21922038	4.628694476	7.39E-06	0.000283115	3.473435476
ZBTB43	0.622136165	9.424343174	4.628468738	7.40E-06	0.000283202	3.472537908
CCDC92	0.485305497	11.20239755	4.628117356	7.41E-06	0.000283308	3.471140825
CDV3	0.530827424	12.31068455	4.628074597	7.41E-06	0.000283308	3.470970826
LGI2	0.81686885	8.14606302	4.627855051	7.42E-06	0.000283318	3.470097965
GRWD1	0.467975964	10.65115345	4.627656306	7.43E-06	0.000283318	3.469307834
ZNF579	0.537301018	9.354818943	4.62758213	7.43E-06	0.000283318	3.469012945
PRELID2	0.771166717	5.75155361	4.627454981	7.43E-06	0.000283318	3.468507473
IL17RE	0.565306772	6.648912196	4.626900877	7.45E-06	0.000283804	3.466304782
RANBP9	0.469320719	11.69675671	4.626521819	7.46E-06	0.000284079	3.464798056
CAST	0.555806041	12.19836932	4.62543689	7.50E-06	0.000285212	3.460486067
PDXDC1	0.470307254	11.25431063	4.624664432	7.52E-06	0.000285922	3.457416448
ALKBH8	0.507461359	8.653070838	4.624550039	7.53E-06	0.000285922	3.456961902
RAB1A	0.372531161	12.88969131	4.624182201	7.54E-06	0.000286185	3.455500341
ARID3A	0.605908325	8.277585471	4.623518072	7.56E-06	0.000286812	3.452861726
FLOT1	0.453397991	13.57497195	4.622864032	7.58E-06	0.000287427	3.450263478
CSDE1	0.434691294	14.06617599	4.621882248	7.61E-06	0.000288447	3.446363756
STK39	0.480435896	10.98818265	4.619960697	7.68E-06	0.000290602	3.438733039
GCC1	0.561799608	10.30971046	4.619834593	7.68E-06	0.000290602	3.438232349
TMEM181	0.552046727	11.14517256	4.619475082	7.69E-06	0.00029086	3.436804985
RP13-516M14.1	0.703542888	7.473450234	4.619082467	7.70E-06	0.000291159	3.435246284
ZNF354C	0.64643753	8.909459223	4.618270892	7.73E-06	0.00029198	3.432024616
ENO2	0.722981742	13.1529453	4.618033308	7.74E-06	0.000292087	3.43108157
CELSR1	1.200488491	8.678193302	4.61768425	7.75E-06	0.000292334	3.429696118
KRT80	1.108933866	4.353140969	4.6175075	7.76E-06	0.000292365	3.428994608
SLC29A4P1	0.610943144	1.143665728	4.616655176	7.78E-06	0.000293241	3.425612074
MRPS5	0.409076869	10.79482804	4.61649361	7.79E-06	0.000293254	3.424970936
RFX8	1.101325536	4.151967967	4.615635761	7.82E-06	0.000294071	3.421567045
POM121L9P	1.026005916	6.88134104	4.615539039	7.82E-06	0.000294071	3.421183287
DERL1	0.388158274	11.54727719	4.61519525	7.83E-06	0.000294313	3.419819314
WWP1	0.490344422	10.12588277	4.614790422	7.85E-06	0.000294632	3.418213266
PGAM4	0.536807796	4.093741118	4.614256572	7.86E-06	0.000294983	3.416095524
TERT	1.343553019	4.602731	4.61411579	7.87E-06	0.000294983	3.415537084
PGAP3	0.437941222	10.17530162	4.614059629	7.87E-06	0.000294983	3.415314313
DAPK3	0.584571517	11.37584223	4.612752549	7.92E-06	0.000296441	3.410130186
KIAA0232	0.502145178	11.220264	4.611744669	7.95E-06	0.000297526	3.406133509
FAM214B	0.525743891	10.60294521	4.610817053	7.98E-06	0.000298514	3.402455703
MTRF1L	0.470962153	9.112646747	4.610629879	7.99E-06	0.000298561	3.401713663
GREB1	0.787387796	8.814601807	4.610169921	8.00E-06	0.000298955	3.39989029
PLK3	0.584875939	9.896016213	4.609261731	8.03E-06	0.0002997	3.396290439
SPOCD1	1.254725571	11.18913866	4.609149839	8.04E-06	0.0002997	3.395846965
FLOT2	0.488642414	12.74387897	4.609135709	8.04E-06	0.0002997	3.395790963
PRKCA	0.577969726	12.0872532	4.608754286	8.05E-06	0.000299996	3.394279285
BICD1	0.598903161	10.96484437	4.607848648	8.08E-06	0.000300692	3.390690387
PIP5K1C	0.571929386	11.7971228	4.607839198	8.08E-06	0.000300692	3.390652943
CCDC137	0.480185034	10.27213628	4.607761882	8.09E-06	0.000300692	3.390346576
QTRTD1	0.506608054	9.488000182	4.607391959	8.10E-06	0.000300974	3.388880812
RP11-363E7.4	0.521076921	6.801772344	4.606983224	8.11E-06	0.000301307	3.387261362
TRAF3IP1	0.526430978	9.305269982	4.606165198	8.14E-06	0.000302166	3.384020586
UBXN2A	0.421324848	10.31016931	4.605718485	8.16E-06	0.000302549	3.382251029
KLF7	0.602260462	10.46466853	4.605541555	8.16E-06	0.000302585	3.381550198
TMEM43	0.462860002	12.07290687	4.604026846	8.22E-06	0.00030435	3.375551159
BRD4	0.554686179	12.07323473	4.603123516	8.25E-06	0.000305002	3.37197422
AC005481.5	0.922290983	3.19044365	4.603094348	8.25E-06	0.000305002	3.37185873
FAM132B	0.969819777	6.957325689	4.603077158	8.25E-06	0.000305002	3.371790671
ADCY6	0.584178565	10.91954213	4.602899081	8.25E-06	0.00030504	3.371085603
SEC16A	0.552709327	11.95891739	4.602129765	8.28E-06	0.000305705	3.368039859
MICAL2	0.83753395	9.690304922	4.602090875	8.28E-06	0.000305705	3.367885901
TAMM41	0.427634802	8.539684292	4.601008656	8.32E-06	0.00030678	3.363602055
SYTL5	1.094892658	6.669728108	4.600969158	8.32E-06	0.00030678	3.36344572
MYOF	0.786261489	10.86451478	4.600525612	8.34E-06	0.000307165	3.361690227
NCKAP5L	0.547672184	10.6540814	4.600093411	8.35E-06	0.000307537	3.359979758
USP36	0.581459479	10.74928845	4.598407204	8.41E-06	0.000309555	3.353307641
FTSJ2	0.452329881	10.84579324	4.598259659	8.42E-06	0.000309555	3.35272391
CLCF1	0.974590219	8.212942289	4.597486098	8.45E-06	0.000309689	3.349663727
NOP58	0.450813287	10.79200148	4.59742813	8.45E-06	0.000309689	3.349434424
XPA	0.427726141	9.097007819	4.597414379	8.45E-06	0.000309689	3.349380028
IL10RB-AS1	0.53937794	5.87514425	4.597359955	8.45E-06	0.000309689	3.349164747
MSC	1.050329697	6.461096787	4.597197993	8.46E-06	0.000309689	3.348524092
GPR107	0.484878425	12.39822738	4.597157601	8.46E-06	0.000309689	3.348364321
PAK2	0.425639712	12.27691581	4.597003786	8.46E-06	0.000309689	3.347755913
TBL2	0.44772026	11.33695063	4.596963826	8.47E-06	0.000309689	3.347597856
RP5-901A4.1	0.776227518	3.559612394	4.596829346	8.47E-06	0.000309689	3.347065942
MOB2	0.43869258	9.987997227	4.596357984	8.49E-06	0.000310116	3.345201645
FAM46A	0.675844979	10.30381819	4.595859863	8.51E-06	0.00031058	3.34323167
HS3ST3A1	1.31715418	5.591665356	4.595691884	8.51E-06	0.000310607	3.342567383
MALL	0.859220634	3.517371023	4.595452027	8.52E-06	0.00031073	3.341618881
SLC9B1	0.491930262	5.900254383	4.595096926	8.53E-06	0.000311005	3.340214719
PTBP3	0.482785965	10.64158247	4.594909589	8.54E-06	0.000311059	3.339473974
SLC19A1	0.506048146	9.751188744	4.594402665	8.56E-06	0.000311536	3.337469669
RP11-2B6.3	0.668468373	3.961999466	4.593627717	8.59E-06	0.000312369	3.334405967
PHAX	0.448104943	10.90648823	4.593290706	8.60E-06	0.000312622	3.333073741
SNHG17	0.630020733	9.736970665	4.592542019	8.63E-06	0.000313423	3.330114402
C17orf70	0.507313751	11.03899471	4.591731496	8.66E-06	0.000314309	3.326911063
TLK2	0.44729714	10.50048155	4.590668155	8.70E-06	0.000315523	3.322709192
MAP1S	0.518681563	11.11245074	4.590532237	8.70E-06	0.000315523	3.322172156
FAM189B	0.450397262	10.00215027	4.589913714	8.72E-06	0.000316156	3.319728416
CWC25	0.433479746	9.799906072	4.587957403	8.80E-06	0.000318424	3.312000828
AIDA	0.454672919	10.53713957	4.587884069	8.80E-06	0.000318424	3.311711204
MAPK1IP1L	0.462566261	12.00387054	4.587753909	8.80E-06	0.000318424	3.311197157
SNX27	0.476973133	11.51382071	4.587647511	8.81E-06	0.000318424	3.310776963
EHBP1L1	0.684840349	10.24966299	4.587116623	8.83E-06	0.000318767	3.308680458
RPL7L1	0.402744754	12.41095152	4.58710269	8.83E-06	0.000318767	3.308625437
ITPKC	0.617314004	10.70234488	4.58667897	8.84E-06	0.000319103	3.306952281
PCNX	0.585661611	10.82665505	4.586469624	8.85E-06	0.000319103	3.306125674
MBOAT7	0.515531585	11.92837569	4.586392235	8.85E-06	0.000319103	3.305820108
RNPEPL1	0.46248267	11.53008275	4.586272706	8.86E-06	0.000319103	3.305348166
LGALS8-AS1	0.59773775	1.273020028	4.585572792	8.89E-06	0.000319599	3.302584839
STK25	0.43034109	12.27191352	4.58549364	8.89E-06	0.000319599	3.302272362
KIAA1919	0.462880344	7.156756878	4.585471653	8.89E-06	0.000319599	3.302185562
WWC3	0.582399904	10.4005287	4.584733953	8.92E-06	0.000320404	3.299273451
RP11-864J10.4	0.604958951	3.327348359	4.584400894	8.93E-06	0.00032066	3.297958804
MEDAG	1.403448916	5.811640271	4.583942175	8.95E-06	0.000321005	3.29614827
KIF13A	0.564010307	10.62284682	4.583858142	8.95E-06	0.000321005	3.295816613
FADS3	0.546298695	11.05979045	4.583565476	8.96E-06	0.00032101	3.294661566
GALNT7	0.52584079	9.895220982	4.583564986	8.96E-06	0.00032101	3.294659634
ENTPD6	0.484254485	11.66847761	4.582876039	8.99E-06	0.000321753	3.291940835
LMO7	0.628268818	8.881699023	4.582056081	9.02E-06	0.000322676	3.288705437
DPAGT1	0.389634343	10.65866981	4.58175228	9.03E-06	0.000322821	3.28750681
DNAJC5	0.524793171	12.39268579	4.581593832	9.04E-06	0.000322821	3.286881687
MUC12	1.132516085	6.008202858	4.581466048	9.04E-06	0.000322821	3.286377553
RP11-147L13.13	0.688671123	7.671044433	4.58126652	9.05E-06	0.000322821	3.285590401
GMPPA	0.427122726	10.72330984	4.581229197	9.05E-06	0.000322821	3.28544316
PGK1P2	0.498144003	5.69446452	4.580985057	9.06E-06	0.000322959	3.28448005
MRPL35	0.403279691	10.85011215	4.580718472	9.07E-06	0.000323104	3.283428439
LDLRAD2	0.772387581	5.553053682	4.580460249	9.08E-06	0.000323104	3.282409863
RP11-373D23.2	0.928858592	1.987637189	4.580447799	9.08E-06	0.000323104	3.282360755
MEIS3P1	0.766410354	6.827506935	4.579848085	9.10E-06	0.00032373	3.279995313
IDUA	0.638810775	9.493881474	4.579514413	9.12E-06	0.000323991	3.278679322
CAMK2D	0.61771851	12.50521879	4.578312395	9.16E-06	0.000325449	3.273939208
POLR3D	0.512225086	10.36581613	4.57787652	9.18E-06	0.000325726	3.272220586
C11orf91	0.702086437	2.647115959	4.577825058	9.18E-06	0.000325726	3.272017685
GRK6	0.429575921	10.44068982	4.577232826	9.21E-06	0.000326347	3.269682783
ATL3	0.478831824	11.69801373	4.576666928	9.23E-06	0.000326932	3.267451919
NQO2	0.451019254	10.43621542	4.575627869	9.27E-06	0.000328177	3.263356331
AARS2	0.523537005	9.669533981	4.574626244	9.31E-06	0.000329373	3.259408967
PPP2R2A	0.411449461	11.44727903	4.574471477	9.31E-06	0.00032939	3.258799094
NOL7	0.387461755	10.96826455	4.574292704	9.32E-06	0.00032944	3.258094644
SAAL1	0.45020143	9.25297351	4.574089147	9.33E-06	0.000329501	3.257292562
RP4-756H11.5	0.468112763	8.206155917	4.573963241	9.33E-06	0.000329501	3.256796461
COL1A1	1.377078052	13.10885009	4.573703046	9.34E-06	0.000329517	3.255771265
SDK1	1.087636855	8.885466439	4.573666899	9.35E-06	0.000329517	3.255628847
CSNK1G2	0.49387848	11.31189428	4.573437031	9.36E-06	0.00032952	3.254723188
ITFG3	0.492504504	11.3853219	4.57334083	9.36E-06	0.00032952	3.254344173
NFKBIZ	0.941407595	9.068862162	4.573157569	9.37E-06	0.00032952	3.253622176
POLR2A	0.554509098	12.94469283	4.573095556	9.37E-06	0.00032952	3.253377866
DLK2	0.77945945	5.915000815	4.572221299	9.40E-06	0.000330544	3.249933882
TACSTD2	1.063518382	4.511051216	4.571791057	9.42E-06	0.000330907	3.248239204
FKRP	0.529769884	9.79130692	4.571678185	9.43E-06	0.000330907	3.247794636
IKBKAP	0.505226855	10.94530628	4.571160159	9.45E-06	0.000331434	3.245754387
PSMC1	0.440881224	10.02635852	4.57078869	9.46E-06	0.000331757	3.244291462
CFLAR	0.485146031	11.37348595	4.569721086	9.50E-06	0.000333061	3.240087519
PUS1	0.4572462	9.215460275	4.569397766	9.52E-06	0.000333299	3.23881452
NATD1	0.539497731	9.50300412	4.569269228	9.52E-06	0.000333299	3.238308449
ARPIN	0.526802153	10.85618673	4.5683669	9.56E-06	0.000334374	3.234756176
NACC2	0.701437803	12.28194789	4.567729803	9.58E-06	0.000335077	3.232248386
CENPE	0.764239555	8.574908948	4.567450484	9.60E-06	0.000335272	3.231148996
PNLIPRP3	0.96011892	1.712869864	4.566747527	9.62E-06	0.000336071	3.228382405
SMCO2	0.776070639	3.41847604	4.566152152	9.65E-06	0.000336598	3.226039475
PATL1	0.540048075	11.15312739	4.56609451	9.65E-06	0.000336598	3.225812652
LPCAT4	0.482567281	9.734967974	4.565478929	9.68E-06	0.000337275	3.22339048
SLC51A	0.50641995	6.709238886	4.564729988	9.71E-06	0.000338075	3.220443901
WWTR1	0.763012295	12.55182727	4.56463757	9.71E-06	0.000338075	3.220080324
PRKCDBP	0.841750106	7.997320755	4.564348712	9.72E-06	0.000338286	3.218943977
SAMD4B	0.525728022	12.38010401	4.563926691	9.74E-06	0.000338689	3.217283879
ECE1	0.662508861	12.69482701	4.563046779	9.78E-06	0.000339728	3.213822963
PNPLA2	0.544408074	11.30925932	4.562805274	9.79E-06	0.000339728	3.212873151
PABPC4	0.447295103	12.17934148	4.562780985	9.79E-06	0.000339728	3.21277763
FAM222B	0.496030272	10.34877529	4.562413532	9.80E-06	0.000339766	3.211332558
METTL15	0.441835108	8.673781537	4.562411042	9.80E-06	0.000339766	3.211322767
DNAJC14	0.4793813	9.632394698	4.562333758	9.81E-06	0.000339766	3.211018845
SOCS5	0.429035818	9.949899107	4.562063822	9.82E-06	0.000339898	3.209957348
IGFBP5	0.860774193	15.29357385	4.56196126	9.82E-06	0.000339898	3.209554049
NUP98	0.440216216	11.52855419	4.561758174	9.83E-06	0.000339989	3.208755475
ARSJ	1.089962182	8.919623501	4.561481573	9.84E-06	0.000340185	3.207667876
ZNF786	0.562767554	8.79675178	4.561314668	9.85E-06	0.000340224	3.207011627
PAPSS1	0.391853171	12.11512831	4.560804951	9.87E-06	0.000340757	3.205007602
TSHZ2	1.083046227	8.192383149	4.560262848	9.89E-06	0.000341337	3.202876434
PDCD6IP	0.432134992	12.08701245	4.560011869	9.90E-06	0.000341442	3.201889824
PTGES	1.071945888	7.143636038	4.559789379	9.91E-06	0.000341442	3.201015245
PTDSS1	0.397748126	11.98393969	4.559771478	9.91E-06	0.000341442	3.200944879
ARHGAP29	0.608911951	10.25446429	4.559163861	9.94E-06	0.000342118	3.198556586
NOP14	0.43519513	10.54093892	4.558660504	9.96E-06	0.000342645	3.196578281
SORBS3	0.480932888	12.27264404	4.558389388	9.97E-06	0.000342824	3.195512806
TYSND1	0.447292521	8.99279159	4.558258479	9.98E-06	0.000342824	3.194998354
RP11-321C24.4	0.522649131	3.97225357	4.557924285	9.99E-06	0.000342927	3.19368508
PTRH2	0.379836779	9.737043552	4.557836563	9.99E-06	0.000342927	3.19334037
NUFIP2	0.494219806	11.80232657	4.557770417	1.00E-05	0.000342927	3.193080451
FRS3	0.484552041	8.5685325	4.557044129	1.00E-05	0.000343672	3.190226703
RP11-295K3.1	0.669927315	4.250530736	4.556978967	1.00E-05	0.000343672	3.189970686
CTD-2589M5.5	0.782981442	1.598900782	4.556699997	1.00E-05	0.000343876	3.188874652
ATP6AP1L	0.536910725	7.887493623	4.556062733	1.01E-05	0.000344476	3.186371133
C6orf47	0.508288731	9.699197918	4.555901287	1.01E-05	0.000344476	3.185736927
RP11-351I24.1	0.768286831	2.262300782	4.555759147	1.01E-05	0.000344476	3.185178575
RSU1	0.459180402	11.52334301	4.555733337	1.01E-05	0.000344476	3.185077194
GET4	0.510758372	7.690182838	4.555097031	1.01E-05	0.000344969	3.182577844
LINC00702	0.794661193	4.966971001	4.555014237	1.01E-05	0.000344969	3.182252658
TPM1	0.532551443	11.71347004	4.554979452	1.01E-05	0.000344969	3.182116036
AP3S1	0.410299969	10.87558058	4.554536592	1.01E-05	0.000345414	3.180376716
FAM46B	1.073238587	7.234929422	4.552988693	1.02E-05	0.000347477	3.174298415
RP11-1109F11.3	0.731170838	4.600031306	4.552445178	1.02E-05	0.000347987	3.172164516
CCT5	0.407800786	12.64263268	4.552365755	1.02E-05	0.000347987	3.171852707
RASA1	0.539572352	10.43270907	4.551141714	1.03E-05	0.000349587	3.167047769
FAM177A1	0.415613151	10.73812466	4.550695904	1.03E-05	0.000349937	3.165298
ZC3H3	0.508992131	10.03534956	4.55062887	1.03E-05	0.000349937	3.165034907
MYD88	0.50882225	11.07202572	4.550188748	1.03E-05	0.00035029	3.163307614
QRFP	0.739347751	3.804175903	4.550115091	1.03E-05	0.00035029	3.163018556
MIR3125	0.839190379	2.080253987	4.549368365	1.04E-05	0.000351192	3.1600883
WDR4	0.462292561	8.69160817	4.548730061	1.04E-05	0.000351935	3.157583799
HOMER2	0.625200233	8.955318528	4.548276283	1.04E-05	0.000352406	3.155803486
ZNF7	0.425186243	9.794638717	4.546873543	1.05E-05	0.000354293	3.150300963
ZNF696	0.557497091	8.494901093	4.546670979	1.05E-05	0.000354391	3.149506473
PLIN3	0.566367471	12.0972593	4.546298555	1.05E-05	0.000354743	3.148045832
PIGO	0.47861983	10.64806648	4.545727135	1.05E-05	0.000355393	3.145804917
COPB1	0.407822902	12.41949845	4.545524808	1.05E-05	0.000355491	3.145011515
TBC1D31	0.495048505	8.299638154	4.545220552	1.05E-05	0.000355554	3.143818454
GDF15	1.104625666	8.769032563	4.545156832	1.05E-05	0.000355554	3.143568602
CTD-2619J13.14	0.645620454	8.410285993	4.545072318	1.05E-05	0.000355554	3.143237217
LINC00205	0.653162046	8.030434859	4.544117393	1.06E-05	0.000356697	3.139493224
POLM	0.523011096	9.792848583	4.543920694	1.06E-05	0.000356697	3.138722099
PGM2	0.419734566	10.47507668	4.543900918	1.06E-05	0.000356697	3.13864457
MPZL3	0.536276595	6.541431801	4.543032855	1.06E-05	0.000357569	3.135241791
TCFL5	0.535035948	9.65870351	4.542915901	1.06E-05	0.000357569	3.134783376
IGFBP6	1.019822501	8.463202088	4.542878795	1.06E-05	0.000357569	3.134637933
ACTL10	0.686895058	4.744676535	4.542633999	1.07E-05	0.000357569	3.133678457
RP1-313L4.3	0.659395945	1.894132427	4.542558281	1.07E-05	0.000357569	3.133381688
ZNF777	0.535301741	10.17643617	4.542503865	1.07E-05	0.000357569	3.133168413
MLH3	0.514177089	9.599770472	4.542020726	1.07E-05	0.000357934	3.131274913
SDE2	0.418955788	10.31664755	4.541989856	1.07E-05	0.000357934	3.131153933
TNFAIP1	0.438768716	12.03076001	4.541451606	1.07E-05	0.000358542	3.129044636
PPP1R26-AS1	0.738379781	4.737942754	4.541261851	1.07E-05	0.000358623	3.128301066
TNFAIP8L1	0.529674253	9.623265028	4.541060238	1.07E-05	0.000358723	3.12751106
RIPK1	0.469651201	10.78063072	4.54063398	1.07E-05	0.000359162	3.125840885
GPR89B	0.371882229	7.462691558	4.540131069	1.08E-05	0.000359719	3.12387052
BRI3BP	0.470468513	9.849284558	4.539980427	1.08E-05	0.000359742	3.12328035
SLC9A7	0.609587534	10.06922561	4.539719405	1.08E-05	0.000359932	3.122257782
DSG2	1.606054675	6.40072822	4.539153945	1.08E-05	0.000360585	3.120042712
RAB6A	0.425034672	12.91195304	4.53852939	1.08E-05	0.000361329	3.117596398
TIRAP	0.44313123	7.889597523	4.538204878	1.09E-05	0.000361617	3.11632542
LINC00152	0.821094134	9.498296257	4.537930856	1.09E-05	0.000361741	3.115252248
ATF6B	0.442526082	11.91238712	4.537853303	1.09E-05	0.000361741	3.114948532
RP11-395L14.18	0.500595794	6.134604988	4.537504617	1.09E-05	0.000361952	3.113583036
AP5B1	0.553568262	8.995197106	4.537444488	1.09E-05	0.000361952	3.113347572
PTMAP2	0.436014976	7.390632609	4.536007856	1.10E-05	0.000363943	3.10772246
PXDC1	0.567551893	11.31448936	4.535777415	1.10E-05	0.000364089	3.1068203
AC012314.8	0.578619094	5.604776256	4.53546186	1.10E-05	0.000364367	3.105584984
SRP19	0.378328478	9.641816017	4.534695166	1.10E-05	0.000365338	3.102583846
GPATCH2	0.42448158	9.376705442	4.534551317	1.10E-05	0.000365352	3.102020807
TMEM184A	0.878789411	2.743339039	4.534218312	1.10E-05	0.000365657	3.100717451
RP11-186B7.4	0.479088878	7.099661809	4.533292381	1.11E-05	0.000366756	3.097093814
USP12	0.510399266	10.06344931	4.533237006	1.11E-05	0.000366756	3.096877122
SLC25A13	0.475725474	10.54928295	4.53272751	1.11E-05	0.000367336	3.094883469
DIEXF	0.454852983	9.831769356	4.532146437	1.11E-05	0.000367932	3.092609947
RRP1	0.444059083	10.39137439	4.531968346	1.11E-05	0.000367932	3.091913187
CARD10	0.699333446	7.622421202	4.531939455	1.11E-05	0.000367932	3.091800154
MKL1	0.561847078	11.1480096	4.531648836	1.12E-05	0.000367984	3.090663197
ANO1-AS2	0.697678653	0.70597798	4.531637002	1.12E-05	0.000367984	3.090616901
AGK	0.450249859	10.91203861	4.531017548	1.12E-05	0.000368737	3.088193665
SHC1	0.677346375	11.80862751	4.530213234	1.12E-05	0.000369779	3.085047661
TPM3	0.41800946	13.46425583	4.528649235	1.13E-05	0.000371931	3.078931442
HS6ST1P1	0.781197818	4.188093471	4.528567215	1.13E-05	0.000371931	3.07861074
RP11-4K3__A.5	0.393951351	5.49595597	4.526965579	1.14E-05	0.000374235	3.072349116
AC083899.3	0.432546389	5.834056161	4.526583394	1.14E-05	0.000374627	3.07085521
PQLC3	0.622737887	9.471184945	4.52634254	1.14E-05	0.000374796	3.069913796
MDH2	0.431841838	13.39401129	4.525756298	1.14E-05	0.000375304	3.067622544
PAICS	0.531964836	12.97444699	4.525752765	1.14E-05	0.000375304	3.067608737
B3GAT3P1	0.440129034	3.521955671	4.52535628	1.15E-05	0.00037572	3.066059259
RDH14	0.397157077	8.939262392	4.524919153	1.15E-05	0.0003762	3.064351068
PPP1R14B	0.515425883	11.74642952	4.524433488	1.15E-05	0.000376666	3.062453353
LAMA5	0.777213097	11.64740502	4.524358184	1.15E-05	0.000376666	3.062159121
WDFY1	0.437494074	10.81053946	4.523978539	1.15E-05	0.000377057	3.060675804
NAIF1	0.380041791	8.728014592	4.523831598	1.15E-05	0.000377079	3.060101715
MAN1A2	0.452670189	11.03358344	4.523428135	1.16E-05	0.000377508	3.058525481
ERI1	0.526956218	10.29604786	4.52302635	1.16E-05	0.000377662	3.056955911
EIF1AD	0.390584177	10.00894866	4.523007604	1.16E-05	0.000377662	3.056882683
ETFDH	0.454932145	9.53551326	4.522931903	1.16E-05	0.000377662	3.05658697
LSM8	0.411022819	9.893796828	4.522617442	1.16E-05	0.000377853	3.055358627
COL19A1	1.176281395	3.491378111	4.522546022	1.16E-05	0.000377853	3.055079655
GAFA3	0.722675012	2.474377146	4.52232638	1.16E-05	0.000377991	3.054221741
HPS6	0.421928401	9.412998689	4.521774464	1.16E-05	0.000378658	3.052066124
ADARB1	0.61492067	9.15781631	4.521349068	1.17E-05	0.000379125	3.050404789
CBX4	0.514676523	10.372474	4.520913009	1.17E-05	0.000379609	3.048701938
CRACR2B	0.767308798	6.792036613	4.5206915	1.17E-05	0.000379751	3.047836976
GGT7	0.502421771	11.0440028	4.520410097	1.17E-05	0.00037978	3.046738181
ANKRD50	0.548594835	9.861012199	4.520408973	1.17E-05	0.00037978	3.046733791
RELA	0.424767016	12.10021293	4.519987983	1.17E-05	0.000380241	3.045090046
SLC25A25	0.672014926	10.7389266	4.519807583	1.17E-05	0.000380318	3.044385716
ZBTB2	0.469515225	9.346569375	4.519392316	1.18E-05	0.000380587	3.042764488
DGKZP1	0.551390641	6.919644812	4.51937541	1.18E-05	0.000380587	3.042698487
SLC26A11	0.463913317	10.18857318	4.519193988	1.18E-05	0.000380666	3.041990241
MTCH2	0.406453549	12.08033737	4.518781062	1.18E-05	0.000381116	3.040378318
PQLC2	0.448151213	9.997057074	4.518338837	1.18E-05	0.000381614	3.038652148
ZDHHC12	0.551497548	9.565887967	4.517890447	1.18E-05	0.000381955	3.036902046
RAB24	0.461674122	8.553300191	4.517862872	1.18E-05	0.000381955	3.036794422
ENO4	1.00612398	4.671103413	4.517120065	1.19E-05	0.000382848	3.033895497
CRTC3	0.478933896	11.31487608	4.517043529	1.19E-05	0.000382848	3.033596827
MFI2	0.728719971	8.720622131	4.516351229	1.19E-05	0.000383543	3.030895382
SCAF4	0.544009216	10.63180151	4.516349198	1.19E-05	0.000383543	3.030887454
IER2	0.633987157	11.23972021	4.515693801	1.19E-05	0.000384388	3.028330307
CCDC9	0.563586435	9.303919685	4.514669298	1.20E-05	0.000385735	3.024333597
ANP32B	0.46380498	12.27687134	4.514490554	1.20E-05	0.000385735	3.023636365
LRRC73	0.703704422	6.718326453	4.514389423	1.20E-05	0.000385735	3.023241893
AC007016.3	0.55353483	3.175378747	4.514326182	1.20E-05	0.000385735	3.022995219
HGS	0.49865958	11.6615683	4.514178135	1.20E-05	0.000385735	3.022417758
RP11-57B24.1	0.850422564	2.208825564	4.513941254	1.20E-05	0.000385735	3.021493836
POGLUT1	0.408667367	10.08919124	4.513908571	1.20E-05	0.000385735	3.021366365
CXorf38	0.431600222	9.942720284	4.513812637	1.20E-05	0.000385735	3.020992197
KLHL8	0.419222678	9.951152951	4.513600399	1.20E-05	0.000385867	3.020164442
CTC-463A16.1	0.497307144	6.631221259	4.513463149	1.20E-05	0.000385878	3.019629165
DHDDS	0.420507214	10.87998203	4.513058686	1.21E-05	0.000386322	3.018051826
SUGCT	0.67231649	7.329520759	4.512552599	1.21E-05	0.000386931	3.016078321
PDGFA	0.827300292	11.40310092	4.511905058	1.21E-05	0.000387772	3.013553463
CTD-3138B18.5	0.458938176	7.921552419	4.511180585	1.22E-05	0.00038874	3.010728972
PMS2CL	0.542076844	8.860100753	4.51071246	1.22E-05	0.000389292	3.008904083
EID3	0.783033763	6.147546962	4.510536731	1.22E-05	0.000389366	3.008219077
SCARF2	0.680072514	9.30096199	4.509995781	1.22E-05	0.000390038	3.006110544
RNF216P1	0.457773852	10.14399214	4.50969682	1.22E-05	0.000390314	3.004945328
RFT1	0.399210214	10.24937578	4.50910187	1.23E-05	0.000391076	3.002626655
NKIRAS2	0.456810627	11.291672	4.508509814	1.23E-05	0.000391439	3.000319497
RP4-614O4.13	0.559763541	6.475310225	4.508429511	1.23E-05	0.000391439	3.000006585
BSG	0.493027026	14.80835462	4.50841664	1.23E-05	0.000391439	2.999956432
ALG12	0.487556107	8.941594375	4.508360862	1.23E-05	0.000391439	2.99973909
MAP2K1	0.428393065	11.57428869	4.507445483	1.24E-05	0.000392642	2.99617254
SH3GLB1	0.447263082	12.7694671	4.507369882	1.24E-05	0.000392642	2.995878002
TOR1A	0.425188811	11.21674845	4.506835176	1.24E-05	0.00039331	2.99379494
TMEM185A	0.4184774	9.216377985	4.506397623	1.24E-05	0.000393818	2.992090496
CCDC127	0.398920456	10.25355525	4.506235513	1.24E-05	0.000393872	2.991459047
PACSIN2	0.547824431	11.54817794	4.504698669	1.25E-05	0.000396204	2.985473614
RBM19	0.49607779	10.20321342	4.504448481	1.25E-05	0.000396391	2.984499375
CTD-2587H24.14	0.603241373	5.786428978	4.504281804	1.25E-05	0.000396391	2.983850356
ACAD10	0.487125869	10.11993349	4.504197826	1.25E-05	0.000396391	2.983523362
GPR155	0.536605069	10.23473931	4.503943916	1.25E-05	0.000396401	2.982534714
GNS	0.563760989	13.02958741	4.503933383	1.25E-05	0.000396401	2.982493702
RP11-803D5.1	0.686602233	2.280400885	4.5036799	1.26E-05	0.000396608	2.981506764
GYS1	0.558135075	11.60063154	4.502900376	1.26E-05	0.000397691	2.978471943
UTP20	0.476240146	10.18535847	4.502427741	1.26E-05	0.000398052	2.976632094
CFL1P5	0.450585265	3.896788609	4.502297955	1.26E-05	0.000398052	2.976126898
RPIA	0.405360098	9.348196064	4.502261622	1.26E-05	0.000398052	2.975985469
BTBD9	0.572036554	9.851711972	4.502168223	1.26E-05	0.000398052	2.975621918
GAPDHP37	0.558686862	2.082069741	4.502000474	1.26E-05	0.000398117	2.974968981
DNAJC2	0.499199733	10.21216153	4.50179731	1.27E-05	0.000398242	2.974178217
TXN	0.50707028	11.96126529	4.501376686	1.27E-05	0.000398729	2.972541138
HAS2	0.704243601	9.46187172	4.500652701	1.27E-05	0.000399725	2.969723644
HNRNPA3P5	0.534271411	5.375268058	4.5003752	1.27E-05	0.000399975	2.968643801
ASXL1	0.501988013	11.61284682	4.500190915	1.27E-05	0.000400069	2.967926719
EIF2S2	0.418109091	11.89414835	4.499579308	1.28E-05	0.00040088	2.965547022
RP11-602M11.3	0.541834043	3.115327411	4.498978887	1.28E-05	0.000401674	2.963211097
KALRN	0.644598577	10.10270456	4.498769887	1.28E-05	0.000401749	2.96239804
PPP2R1B	0.397165399	10.01850154	4.498677491	1.28E-05	0.000401749	2.96203861
PHF21A	0.512413338	11.15240552	4.498411804	1.28E-05	0.000401981	2.961005092
ALDH1B1	0.495791509	10.04317115	4.498194319	1.28E-05	0.000402132	2.960159109
WIZ	0.558556643	11.60408232	4.49794259	1.29E-05	0.00040234	2.959179968
SGMS2	0.802032621	7.680852232	4.497480213	1.29E-05	0.000402904	2.957381584
PITPNM2	0.645372609	9.95301328	4.4970843	1.29E-05	0.000403334	2.955841818
PRICKLE3	0.604570489	7.765021885	4.496969852	1.29E-05	0.000403334	2.955396734
OGFR	0.522225178	11.08564501	4.496464571	1.29E-05	0.000403873	2.953431814
KIF3C	0.610503925	11.5127616	4.496395494	1.29E-05	0.000403873	2.953163201
CLK3	0.438162924	10.71054675	4.495107254	1.30E-05	0.000405841	2.948154369
DCAF6	0.449682299	10.87171523	4.494847601	1.30E-05	0.000406066	2.947144943
GAPDHP47	0.494158816	0.981490627	4.494481332	1.30E-05	0.000406472	2.945721113
RAC1P2	0.424540409	7.821990815	4.494242334	1.31E-05	0.000406662	2.944792081
CMTM8	0.699015632	6.618238294	4.493743111	1.31E-05	0.000407295	2.942851632
WBSCR22	0.411482034	11.97416305	4.49346701	1.31E-05	0.000407483	2.941778514
RFX1	0.538920323	9.62443257	4.49337865	1.31E-05	0.000407483	2.941435098
LMF2	0.524681572	11.61923844	4.493153151	1.31E-05	0.00040765	2.940558707
RNF26	0.448632479	10.76625106	4.492753596	1.31E-05	0.000408081	2.939005939
RAB31	0.522040474	14.06500461	4.492646716	1.31E-05	0.000408081	2.938590594
ABHD17AP6	0.706291642	3.641862327	4.491173006	1.32E-05	0.000410135	2.932864428
IBTK	0.461346212	10.63903856	4.491120512	1.32E-05	0.000410135	2.932660485
RP11-50C13.1	0.54178838	4.893762126	4.491066153	1.32E-05	0.000410135	2.932449303
ZNF830	0.421929545	9.510874268	4.490881671	1.32E-05	0.000410234	2.931732605
KCNH6	0.777808005	2.954788969	4.490574622	1.33E-05	0.000410543	2.930539796
NSRP1	0.528877682	10.42822216	4.490032153	1.33E-05	0.000411258	2.928432592
SUN1	0.499499863	12.29247342	4.489226198	1.33E-05	0.000412186	2.925302251
RCCD1	0.476317995	9.005302203	4.489126156	1.33E-05	0.000412186	2.924913715
PIAS3	0.467441506	10.5470293	4.48911396	1.33E-05	0.000412186	2.924866351
PGM2L1	0.727434998	10.87860334	4.488755664	1.34E-05	0.000412586	2.923474889
RAD51C	0.408116886	9.78230086	4.488609946	1.34E-05	0.000412619	2.922909012
LIMA1	0.674808627	12.50282619	4.488252509	1.34E-05	0.000413018	2.921521007
BCL10	0.402151972	9.312223513	4.487853756	1.34E-05	0.000413489	2.919972665
BOLA3-AS1	0.459954259	8.271210705	4.487002095	1.35E-05	0.000414745	2.916666058
MAML1	0.522049963	10.79828531	4.486330898	1.35E-05	0.0004156	2.914060452
ZNF516	0.528707077	10.16310563	4.486257426	1.35E-05	0.0004156	2.913775252
PAK4	0.486172501	10.80432372	4.485865811	1.35E-05	0.000416062	2.912255152
CFAP45	1.08131145	5.46615643	4.485695372	1.35E-05	0.000416139	2.911593601
WIPI1	0.537988728	9.654416148	4.485505809	1.35E-05	0.00041625	2.910857849
UBE2MP1	0.435638773	5.888290064	4.485362048	1.36E-05	0.000416281	2.910299883
MC1R	0.722519389	7.437562222	4.485103521	1.36E-05	0.00041647	2.909296524
TAF10	0.43581832	11.52357637	4.485001713	1.36E-05	0.00041647	2.908901412
ANKS6	0.54171283	10.04117574	4.484732823	1.36E-05	0.000416615	2.907857898
RP5-1198O20.4	0.657310238	6.970923408	4.484667171	1.36E-05	0.000416615	2.907603123
UFSP2	0.433960963	10.24928905	4.484322632	1.36E-05	0.000416997	2.906266114
IL1RL2	0.921272159	3.067608503	4.482955587	1.37E-05	0.000419166	2.900961987
ITGB5	0.668512896	11.87636468	4.48276524	1.37E-05	0.000419178	2.900223541
CSTF3	0.422590961	10.44665714	4.482570955	1.37E-05	0.000419178	2.899469843
CD93	0.753133224	11.43513353	4.482538807	1.37E-05	0.000419178	2.899345131
ZCCHC6	0.55440423	9.559273608	4.482447297	1.37E-05	0.000419178	2.898990143
CFL1	0.393491434	15.46209225	4.481714598	1.38E-05	0.000420244	2.896148039
KLK13	0.673063505	0.784349661	4.48090326	1.38E-05	0.00042145	2.893001322
GPR153	0.99633543	9.031774826	4.480681165	1.38E-05	0.000421621	2.892140021
ADCK5	0.467473463	8.179752827	4.480221265	1.38E-05	0.000422211	2.890356594
TMEM86B	0.569942984	6.574593195	4.479905639	1.39E-05	0.000422338	2.889132725
PCBP1	0.403028496	12.5483577	4.479899389	1.39E-05	0.000422338	2.889108491
SPNS1	0.577317602	7.59318814	4.479091611	1.39E-05	0.000423544	2.885976565
PBDC1	0.427747091	9.720341411	4.478942838	1.39E-05	0.000423587	2.885399788
FLII	0.502605434	12.26045569	4.478289303	1.40E-05	0.000424523	2.882866279
SLC35E2B	0.549829144	11.34332199	4.477791317	1.40E-05	0.000424986	2.88093597
TPD52L2	0.401542273	12.44611869	4.477779175	1.40E-05	0.000424986	2.880888907
ARRDC3	0.559438119	11.96292072	4.476717626	1.41E-05	0.000426652	2.876774655
CITF22-1A6.3	0.562495331	4.539317242	4.476467748	1.41E-05	0.000426875	2.875806315
TIGD6	0.444230213	8.666558825	4.476120833	1.41E-05	0.000427272	2.874461998
CD97	0.741443211	11.1183072	4.475301496	1.41E-05	0.000428513	2.871287337
EXT1	0.479007575	10.20443807	4.474769288	1.42E-05	0.000429174	2.869225449
GADD45A	0.733840948	11.76921129	4.474638297	1.42E-05	0.000429174	2.86871799
TM9SF4	0.510255047	12.19969846	4.474493971	1.42E-05	0.000429174	2.868158887
DMBX1	1.292659584	4.153025252	4.474435052	1.42E-05	0.000429174	2.867930647
G3BP2	0.401445825	12.4313267	4.473917347	1.42E-05	0.000429879	2.865925243
CYTH2	0.490996003	11.67356065	4.473519076	1.42E-05	0.000430317	2.864382608
KIAA0368	0.556628508	11.53105732	4.473311369	1.43E-05	0.000430317	2.863578132
BIN3	0.416661719	9.159389776	4.473252635	1.43E-05	0.000430317	2.863350654
LIX1L	0.426774327	11.23341503	4.473177346	1.43E-05	0.000430317	2.86305906
MIS18A	0.4533213	8.889509509	4.472644676	1.43E-05	0.000431052	2.860996144
ALDH3B1	0.69842375	9.440359679	4.472264022	1.43E-05	0.000431514	2.85952207
RP11-51F16.1	0.673489847	6.762298669	4.47081436	1.44E-05	0.000433908	2.853909178
CFL1P3	0.458627551	2.863454812	4.470011521	1.45E-05	0.000435139	2.850801304
MIR210	0.85143261	1.667144642	4.469799663	1.45E-05	0.000435299	2.849981249
EDEM3	0.493668146	10.82772989	4.468947216	1.45E-05	0.000436624	2.846681934
SUPT6H	0.506026259	12.32955987	4.468215734	1.46E-05	0.000437732	2.843851194
RP1-228H13.5	0.644758544	7.28469083	4.467732264	1.46E-05	0.00043798	2.841980423
PIPSL	0.37908491	6.4245066	4.467711237	1.46E-05	0.00043798	2.841899065
PDF	0.524199421	6.153254144	4.467709425	1.46E-05	0.00043798	2.841892052
UBOX5	0.444190666	9.443657415	4.467406996	1.46E-05	0.000438308	2.840721898
SLC35E1	0.466988499	11.52870142	4.466397042	1.47E-05	0.000439931	2.836814649
LRRC41	0.417744967	12.13894201	4.465912787	1.47E-05	0.000440593	2.834941432
PPP1R7	0.399431485	11.16014491	4.465227226	1.47E-05	0.000441627	2.832289789
SUMF1	0.534569217	10.35383677	4.464718874	1.48E-05	0.000442337	2.830323766
ABCB8	0.518529322	11.25698291	4.464137753	1.48E-05	0.000443079	2.828076528
HERC3	0.491599639	9.628433691	4.464070392	1.48E-05	0.000443079	2.827816053
UBA5	0.414321119	10.80213284	4.463567164	1.48E-05	0.000443571	2.825870239
TXLNA	0.481702951	12.01517141	4.463440993	1.49E-05	0.000443571	2.825382403
FAM126A	0.560095089	11.06646738	4.463379262	1.49E-05	0.000443571	2.825143727
COL1A2	1.162617882	13.49674413	4.463312879	1.49E-05	0.000443571	2.824887068
LINC00657	0.474287611	13.89417378	4.462745237	1.49E-05	0.000444228	2.822692489
LSM12	0.390504094	9.09905052	4.462602699	1.49E-05	0.000444228	2.822141451
PHTF1	0.457209312	9.86061491	4.462589546	1.49E-05	0.000444228	2.822090603
IGSF8	0.505943411	11.60970785	4.46237647	1.49E-05	0.000444396	2.821266904
KLC1	0.551847155	10.98289042	4.461783718	1.50E-05	0.000445267	2.818975622
BMP8A	0.822543629	5.240321905	4.461063439	1.50E-05	0.000446377	2.816191709
PSMC5	0.38327927	12.49296134	4.460833737	1.50E-05	0.000446577	2.815303971
GRK4	0.471221079	8.745881996	4.460566398	1.50E-05	0.000446847	2.814270822
FHOD1	0.508894819	9.943103501	4.460378851	1.50E-05	0.000446968	2.813546063
PBX4	0.705536798	6.150711853	4.460105293	1.51E-05	0.00044725	2.812488965
ZFPM1	0.52599927	8.258261731	4.459926512	1.51E-05	0.000447355	2.811798139
YKT6	0.499681545	13.02466025	4.459670667	1.51E-05	0.000447605	2.810809561
CTSD	0.560743983	14.37699732	4.459472662	1.51E-05	0.000447746	2.810044509
MET	1.294934358	8.655991962	4.459134673	1.51E-05	0.000448149	2.808738647
HLCS	0.523850618	10.04698815	4.458994213	1.51E-05	0.000448184	2.808195985
SEC61B	0.373025613	11.49220717	4.458629241	1.52E-05	0.000448638	2.806785992
PAQR7	0.433782933	9.564664681	4.458467244	1.52E-05	0.000448713	2.80616018
PJA2	0.494236277	13.44045308	4.457789771	1.52E-05	0.000449752	2.803543218
DOK1	0.458354555	10.16225558	4.457288659	1.52E-05	0.000450463	2.801607704
ZNF143	0.393799344	9.4724532	4.456983662	1.53E-05	0.000450807	2.800429759
PPRC1	0.54887134	10.1516016	4.456749719	1.53E-05	0.000451018	2.799526274
RP5-884M6.1	1.126993217	1.472220657	4.456568622	1.53E-05	0.00045113	2.798826907
SYVN1	0.445133739	11.44887144	4.456048128	1.53E-05	0.000451879	2.796816967
MPZL2	0.753932792	7.77463521	4.455807108	1.53E-05	0.000452104	2.795886304
RPN1	0.375374656	13.68994116	4.455374269	1.54E-05	0.000452691	2.79421506
LRCH3	0.475121074	10.74880567	4.454516174	1.54E-05	0.000454081	2.790902226
OPA3	0.472808079	10.19646512	4.454376137	1.54E-05	0.000454116	2.790361637
TTPAL	0.489491488	10.26901515	4.453839996	1.55E-05	0.000454901	2.788292068
CKAP5	0.549429835	12.59526425	4.45368468	1.55E-05	0.000454965	2.787692565
NUP50	0.490013809	10.81759594	4.453193185	1.55E-05	0.00045552	2.785795559
PLIN2	0.83241321	11.29143775	4.453149665	1.55E-05	0.00045552	2.785627594
BNIP3L	0.437367918	13.00232995	4.453023266	1.55E-05	0.00045553	2.785139766
OTUD4	0.460418685	10.63921423	4.452173615	1.56E-05	0.000456913	2.781860878
PRMT2	0.424812999	12.69070266	4.451724901	1.56E-05	0.000457536	2.780129442
RP11-106M3.3	0.493840465	6.190026289	4.451457687	1.56E-05	0.000457815	2.77909842
GNPAT	0.366033633	11.40460323	4.450209354	1.57E-05	0.000459966	2.774282462
MMS19	0.447110156	10.90316385	4.450054882	1.57E-05	0.000460031	2.7736866
GNA11	0.556924573	11.93215204	4.449198545	1.58E-05	0.00046144	2.770383625
ANO10	0.393361518	10.36978011	4.448934347	1.58E-05	0.000461716	2.769364691
VGLL3	0.946224729	5.384305808	4.4486541	1.58E-05	0.000462022	2.768283908
TRPM8	1.062125032	7.309238254	4.448309492	1.58E-05	0.000462453	2.766954988
MRPS18A	0.486704067	9.915228109	4.447708822	1.59E-05	0.000463377	2.764638803
[truncated: 56,389 more rows]
