# Supplementary material for: Prognosis and immunoinfiltration analysis of angiogene-related genes in grade 4 diffuse gliomas
Source: Aging (Albany NY). 2023 Sep 21;15(18):9842–57. doi: 10.18632/aging.205054 (PMC10564429; doi:10.18632/aging.205054)
Supplement: Supplementary Table 4 [file aging-15-205054-s004.xls]

## Sheet: Sheet1
Supplementary Table 4. Angiogenesis-related genes from GeneCards database.
VEGFA
KDR
HIF1A
FGF2
FLT1
ADGRB1
ANGPT1
TEK
THBS1
ANGPT2
ENG
VEGFC
ADGRB3
ADGRB2
PLG
MMP9
MMP2
AKT1
CXCL8
NOS3
PTGS2
TYMP
NRP1
HGF
PGF
SERPINF1
FLT4
IL6
COL18A1
CTNNB1
TGFB1
EPO
VASH1
ISM1
VEGFD
ITGAV
TNF
DLL4
PDGFRB
HPSE
EGFR
PECAM1
STAT3
FGF1
TP53
BAIAP2
CDH5
MAPK1
GDF2
SRC
ANG
ETS1
NOTCH1
ITGB1
TIMP1
CCL2
ACVRL1
FGFR2
VEGFB
IL1B
CCN1
FGFR1
PDGFB
ITGB3
CXCL12
TGFB2
NDP
ACE
TIMP2
PTK2
MMP14
TIE1
ANPEP
FN1
EPHB4
PIK3CG
BMP6
JAK2
BAIAP3
EPHA2
VWF
CD36
SMAD4
SETD2
F3
EFNB2
PDGFRA
VASH2
PLAU
ARNT
ITGA5
NOS2
SERPINE1
ERBB2
ANGPT4
TIMP3
MET
EGF
ADM
THBS2
PTEN
ECM1
CEACAM1
TGFA
ID1
SPP1
SOD2
PIK3CA
ROBO4
HRG
COL4A2
CD34
VTN
HMOX1
JUN
LRP5
LEP
TGFBR1
MAPK14
KIT
PRKCA
COL4A3
FZD4
MMRN2
NRP2
TNC
MTOR
TNMD
JAG1
RHOJ
PF4
PROK1
RECK
WARS1
CCN2
AGTR1
RHOA
ADAMTS1
EPHA1
CXCR4
EGLN1
EPAS1
AIMP1
BSG
AKT3
ANGPTL3
IL1RN
AGGF1
PTGS1
MAPK3
VHL
PTN
MMP1
PRKD1
ANGPTL4
PRKD2
CALR
BIRC5
TNFSF12
CNMD
PPARG
S1PR1
CIB1
EFNA1
RAC1
PRSS23
F2R
IFNG
ZC3H12A
ADAMTSL1
PDGFC
FGFR3
IFNA1
IGF1
EPHB2
BCL2
PDGFA
COL4A1
UNC5B
SP1
MYC
SERPINB5
TGFBR2
BAIAP2L2
VCAM1
EGFL7
ECSCR
NFKB1
MMP7
RAF1
CXCL10
CXCR3
HDAC9
DCN
MMP3
XBP1
ITGB1BP1
SEMA4A
IL10
CCND1
IL1A
CASP3
ADGRA2
KRIT1
SEMA3E
TNFSF15
BMP4
MINAR1
PLAUR
PCNA
BDNF
JAM3
RPS6KB1
IGF1R
KLK3
APLN
ESM1
JMJD8
CAV1
HSPG2
APLNR
ICAM1
AAMP
PTK2B
TMIGD2
SRPX2
EDN1
CSF1
EDIL3
MDK
HFE
FLT3
MCAM
HSP90AA1
STAB1
COL15A1
F2RL1
PDCD10
CRP
PIK3CB
MIF
CA9
EPHB1
AKT2
IL17A
AMOTL2
METAP2
YJEFN3
SDC1
MPL
VAV3
RTN4
IL17F
MEOX2
HIPK2
PDE3B
SMAD1
CD248
GREM1
PON1
PLCG1
SIRT1
EMC10
F2
IGFBP3
SHC1
NCBP2AS2
BAIAP2L1
ROCK1
CHRDL1
FASLG
MKI67
MMP13
ADIPOQ
S100A4
ING4
CSF1R
FGFBP1
SMOC2
NINJ1
PLXND1
RNF213
CXCL1
IL18
IL2
OTULIN
CASP8
CD44
CSF3
CX3CR1
PTPN11
EMP2
MYDGF
EPOR
PDGFD
SPARC
BCL2L1
GIT1
FGFR4
ESR1
EP300
BRAF
HBEGF
MAPK8
NDRG1
TWIST1
SEMA5A
TNFRSF12A
NTN4
HMGB1
CHI3L1
PPP1R16B
SARS1
PXN
SHB
ANXA2
SCG3
CXCR2
BCAS3
AGT
ANGPTL6
CXCL5
PTX3
CLEC14A
LOXL2
FAP
FUT1
PDCD6
IL6R
PLXDC1
NFE2L2
ITGB5
ADGRG1
NRARP
KRAS
CCL5
TET2
HLA-G
E2F7
LMO2
ID3
ROBO1
RRAS
BMX
HSPB6
E2F8
PRKCB
BMP2
CCN3
IL32
PGR
SEMA3A
AQP1
PROX1
MMP19
SST
ITGA6
RAPGEF3
TGM2
MTDH
CYP2C9
NAXE
ENPP2
EDNRA
DAB2IP
ILK
PKM
CSF2
ACKR3
AGER
SH2B3
INSL6
CXCL17
SLC2A1
NTRK1
SLIT2
RUNX2
NOTCH4
RELA
SHH
PRL
TNFSF10
EGR1
TNFRSF11B
CYBB
DLL1
THBD
CD160
IFNA2
SELE
POSTN
CD47
CDKN2A
CDC42
PF4V1
ARHGAP24
NAMPT
EZH2
CXCL11
S1PR3
CD40
CREBBP
VCAN
TGFB3
CDH1
ADGRL4
SELP
HDAC5
CTSB
TBXA2R
PDPN
HIF1AN
GATA2
HTRA1
ALOX5
SPHK1
FMNL3
PROKR1
IGF2
CDKN1B
SYNJ2BP
INS
CDKN1A
NUS1
STAB2
MAGI1
VCL
KLF4
CDK2
RUNX1
CBL
MAP2K5
SH2D2A
RARRES2
WNT5A
PIK3R1
CDH13
MGAT5
IL4
TGIF1
LGALS1
THSD7A
NR4A1
KLF2
PIGF
SERPINA4
LEPR
RSPO3
MFGE8
BMP10
SOX18
UQCRB
NEO1
MMP12
LGALS9
HDAC7
TNN
IL13
CFH
MED28
HIF3A
PROKR2
STAT1
MTA1
NOTCH3
PPARD
PTPRB
AMOT
RCAN1
ERG
NTN1
CDK5
CX3CL1
YAP1
REN
ADAMTS9
NR2F2
NOTCH2
PIK3C2A
CD40LG
IRS1
TDGF1
ALB
AHR
SEMA6A
FOS
SEMA4D
BAX
F11R
ABL1
FZD5
VAV2
PGK1
TERT
CALCRL
TLN1
CPQ
CREB1
IFNB1
BMPER
IL24
SOX17
HIPK1
MDM2
CYP1B1
SRF
EPHB3
RAMP2
CDKN3
SCUBE2
KLHL20
PLXNB1
TNFRSF1B
MST1R
NGF
APELA
NES
SCUBE3
PTTG1
FGF4
HTATIP2
AGTR2
EFEMP1
THBS4
PTK7
KNG1
MXRA8
STAT5A
HYAL1
CAPN6
SOCS3
IL15
SYK
SIRT2
AZU1
NOX4
COL5A1
ALOX12
PPARA
HRAS
ITGA2
ANXA5
ELAVL1
LGALS3
DNMT1
ANGPTL7
CYLD
CLIC4
BMPR2
FOXO3
EIF4E
NF1
TJP1
WT1
PARVA
SEMA3F
LOX
AKR1B1
RCAN2
IGFBP1
CCNA2
FGF7
PLPP3
COL8A1
TNFSF11
FOXO1
MACC1
HMGA2
PROK2
GRP
PARP1
AFP
MGMT
ID4
PIK3R6
MAPK7
ACTB
PTPN14
COL1A1
AR
GHRL
LRG1
PRKX
VIM
ID2
COL4A6
FOXP1
RNF31
CXCL9
SPRY1
AXL
FGF6
DDAH1
FOXM1
CYP2C19
YARS1
RET
CCR3
BCAR1
PAK1
ALK
NME1
NFKBIA
EDN2
EFNB1
TNFAIP2
BRCC3
PFKFB3
OSM
IL5
TXNIP
MAPK10
RHO
CSPG4
STAT5B
CRBN
ZNF304
CEMIP2
MAGI2
MCL1
BCL2L11
PPARGC1A
EREG
SP100
JUP
IL12A
HOXA5
TFCP2
PIK3CD
MPO
BMPR1A
MAP2K1
JAK1
NCL
LAMA4
PTAFR
LAMB2
NOX1
ZEB1
RHOB
TP73
HSPA5
PDE4A
NRXN3
APOLD1
TKT
AGO2
TNNI2
UBC
SMAD2
STK11
NCKIPSD
MCTS1
NFATC2
KITLG
CAMP
NDRG4
HSPB1
CXCL6
FAS
CTSD
WNT7A
HAND2
ARHGAP22
RASIP1
LEF1
CCL21
COX5A
IFI27
PLXNC1
DKK1
YY1
WNT7B
RBCK1
CCL3
ITGB2
FOXC2
RAP1A
EIF4EBP1
PDPK1
MIA3
STS
SEMA3C
IL20
CGA
IL2RA
CTSL
E2F1
PPIG
PLAT
GNA13
SCG2
GAB1
LYVE1
PDCL3
PTGIS
CCL11
TLR4
CDK4
ESR2
ITGA3
TRAF6
ANGPTL1
NRXN1
C1GALT1
NOX5
TUG1
SUCNR1
TGFBI
SERPINC1
GRN
FGF18
SFRP2
ATF2
TSPAN12
LTA
EDNRB
ROCK2
ADAMTS8
TGFBR3
SPON1
HDAC1
GTF2I
IL1RAPL2
ITGB8
MAPK9
RHOD
RHOC
B2M
PKNOX1
CCDC134
FOXJ2
ADTRP
TLR2
GLI1
ANXA1
BTG1
FKBPL
ATP2B4
SDC2
EPHA3
MMP8
BMP7
ADAM17
HEY1
DPP4
BACH1
CHUK
APP
UGT1A1
GJA1
SEMA3B
KRT18
ELANE
YBX1
DICER1
STIM1
ATP7A
WARS2
CDK6
FBLN1
SULF1
GPNMB
EFNA3
SFRP1
CREB3L1
NR3C1
KLF5
NGFR
SPRY2
PRKAA2
AMOTL1
SRPK1
FBLN5
APOH
GSK3B
ACE2
TTR
HMGCR
STUB1
TLR3
HHEX
MMP10
NTRK2
CXCR1
PROCR
GLUL
TLR9
CD24
TAC1
ACTC1
FSTL1
OPTC
CASP9
APEX1
PTPN6
PML
IQGAP1
GPR4
SMAD3
BECN1
NUDT6
ADAM15
CXCL2
TXN
CCBE1
FBXW7
HK2
TEAD4
LAMB1
COL7A1
LIF
NRG1
ADAM12
IL37
TRAF2
FIBP
PLXDC2
SPRED1
CCR1
PRKAA1
MAP3K5
LCN2
RUNX3
ADORA2B
IL33
ELN
S100A1
LAMA2
RACK1
EPHA4
TFAP2A
CDH2
PIM1
THPO
ADAM9
CRIM1
FILIP1L
LAMA5
CAPN2
ING1
CCL24
TBXAS1
TSHR
ADORA3
MUC1
ETS2
RNH1
ERAP1
NCAM1
NRCAM
CLDN5
BDKRB2
HPSE2
FGF9
ADM2
GATA6
HOXB13
RLN2
SLC2A3
CASP7
SDC4
PTGER2
CD38
S100A13
NOL7
PKD2
SHARPIN
IL3
XIAP
TFPI2
IL12B
EIF2AK3
CCN6
MERTK
CD163
MELTF
RAPGEF2
IDH1
CCNB1
GATA4
EGR3
PROM1
F10
PSEN1
METAP1
PITRM1
PTGER4
BIRC3
BIRC2
EFNB3
SSTR2
ETV6
FLNA
TMSB4X
ESRRA
F8
HMMR
NR1H2
CHGA
APOA1
SERPINH1
FABP4
CHRDL2
ALKBH8
GDF15
SPHK2
PLA2G3
RETN
CD82
NDRG3
CHRNA7
VLDLR
ITGA1
CRYAA
IGFBP2
CYBA
RB1
HOXD3
PROS1
TF
CCR4
ADAMTSL4
ADGRA3
NPY
DNMT3A
RGCC
SGK1
JAM2
ARHGEF4
KLK14
INSR
PIK3R2
NDRG2
CTNND1
RBPJ
ATP5IF1
WNT2
SLC17A5
NRAS
AGR2
ETV1
ADAMTS10
STC1
CP
CTTN
LTB4R2
ELK3
SELL
RBX1
GATA1
IL6ST
CCL4
ERN1
SDCBP
TNNI1
SPATA13
LAMC2
PTPRM
PANK2
SOX2
CCR5
CCR6
NPTX1
ATF4
HRH1
CDK1
GAB2
CEBPB
HECW2
SIK2
KISS1
HDGF
SLC16A1
DUSP1
CD276
CYCS
COL1A2
EMILIN2
VEZF1
PTP4A3
HGS
LAMC1
RARA
MSN
MEN1
HMGA1
ARMS2
RNASE1
NODAL
IL11
BDKRB1
OS9
SHROOM2
CCR10
FKBP5
IGFBP7
RAP1B
COL4A4
COL4A5
SPON2
CSNK2A1
TARS1
PRKCD
F5
TRPC6
PLXNA1
ILF3
ADORA2A
APOE
VDR
BGLAP
TNFRSF1A
CITED4
ITGA2B
FGF10
ADAM8
SOD1
SOCS6
HDAC6
PTPN3
RNGTT
CTNNA1
CCL20
PSMD4
IL7
ERBB3
PAX2
FOXA1
RRM2
PRCP
POFUT1
CARD10
PLEKHG5
RAB13
SH3BP1
REM1
CCR7
TACR1
CCDC88A
PI4KA
PLN
PI4KB
CNR2
LDHA
TOP1
IKBKG
ADAM10
CD151
CXCL16
ATM
WIF1
COL8A2
H4-16
MYH9
ENPEP
AGO1
PTGES
C3
S1PR2
PENK
RASA1
EGFL6
PRNP
SOAT1
RASGRP1
PDK1
DDB1
MYCN
NPR1
ITGAX
HADHA
GH1
LAMTOR5
CCL23
ROBO3
USP20
GFAP
ITGB4
IKBKB
PKD1
ALOX15
LPAR1
IGFBP5
ARL6IP5
FCGR3A
TBK1
TSPO
AGK
HOXB9
H2AX
FPR1
HSPA4
FOLH1
GJA5
SAT1
GADD45A
NOS1
ITGA4
MMP15
GAS6
GAL
KDM5A
BMP1
ANTXR1
IGFBP4
TP63
TRAF3
CPB2
INHBA
CMKLR1
ABCG2
C5
ADAMTS13
ATF3
HAS2
ADGRE5
NECTIN4
TSGA10
COL13A1
ITFG1
GHSR
MEIS1
OR10J5
CDC25C
FGF3
IL9
HTN1
BPI
CCL19
MAP3K7
FASN
CCL28
HAS1
ETV7
COL22A1
UNC13D
CYP3A4
